# Supplementary material for: Significance of climate and hydrochemistry on shape variation – a case study on Neotropical cytheroidean Ostracoda
Source: Copernicus journal article supplement (doi:10.5194/bg-15-5489-2018), 2018-09-14
Supplement: Supplementary file 1 [file bg-15-5489-2018-supplement.zip]

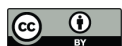

## *Supplement of*

# **Significance of climate and hydrochemistry on shape variation – a case study on Neotropical cytheroidean Ostracoda**

**Claudia Wrozyna et al.**

*Correspondence to:* Claudia Wrozyna ([claudia.wrozyna@uni-leipzig.de](mailto:claudia.wrozyna@uni-leipzig.de))

- [bg-15-5489-2018-supplement-title-page.pdf](#)
- [Supplementary Figure 1.docx](#)
- [Supplementary\\_Table\\_1.xlsx](#)
- [Supplementary\\_Table\\_2.xlsx](#)
- [Supplementary\\_Table\\_3.xlsx](#)
- [Supplementary\\_Table\\_4.xlsx](#)

The copyright of individual parts of the supplement might differ from the CC BY 4.0 License.
