# Supplementary material for: Significance of climate and hydrochemistry on shape variation – a case study on Neotropical cytheroidean Ostracoda
Source: Copernicus journal article supplement (doi:10.5194/bg-15-5489-2018), 2018-09-14
Supplement: Supplementary file 1 [file Supplementary Figure 1.docx]

Supplementary Figure 1. Q-Q-plots for multiple regression datasets where the Shapiro-Wilk tests were not significant. In all four cases, the majority of data points match the expected distribution.
