# Supplementary material for: Significance of climate and hydrochemistry on shape variation – a case study on Neotropical cytheroidean Ostracoda
Source: Copernicus journal article supplement (doi:10.5194/bg-15-5489-2018), 2018-09-14
Supplement: Supplementary file 2 [file Supplementary_Table_1.xlsx]

## Sheet: Localities+Ecodata
Supplementary Table 1. List of localities the studied ostracods derive from, including information on geographic position and habitat type, as well as the variables measured in the field and obtained from WorldClim.
Sample	Locality	Date	Country	N	W	Habitat	EC [µS/cm]	pH	Temp. [°C]	Na [mg/l]	K [mg/l]	Mg [mg/l]	Ca [mg/l]	Cl [mg/l]	SO4 [mg/l]	HCO3 [mval/l]	BIO1 [°C]	BIO2 [°C]	BIO4 [SD*100]	BIO12 [mm]	BIO15 [coeff. var.]
BR CU 1 15	Custódia Lagoon	2015-09-04	Brazil	−30°02'15.2"	50°10'20.2"	lagoon	161.5	6.5	19.1	21.6198	1.42701	2.49927	3.21601	33.7336	7.84033	0.29	18.8	7.6	320.7	1491	9
BR EM 3 15	Emboaba Lagoon	2015-09-03	Brazil	−29°57'52.8"	50°13'27.4"	lagoon with temporary conection to the ocean	49.3	6.8	20.2	3.77756	0.885434	0.85975	1.72632	5.23672	2.54951	0.15	18.8	7.1	280.7	1416	11
BR ITA 4 15	Lagoa Itapeva	2015-09-06	Brazil	−29°22'32.6"	49°47'39.2"	lagoon, next to inflow	61.5	6.3	20.4	6.90963	0.637474	1.16491	1.50171	9.2725	2.18627	0.17	18.8	7.1	280.7	1416	11
BR PL 1 15	Passos da Lagoa	2015-09-03	Brazil	−29°51'16.1"	50°06'57.9"	littoral of a lake, dense macrophytes	69.8	7.2	22.2	7.57192	0.893148	1.59303	2.65856	10.6676	0.895069	0.29	18.9	7.3	309.8	1492	9
BR PTO 4 15	Laguna Passos de Torres	2015-09-07	Brazil	−29°18'39.6"	49°42'32.8"	lagoon, floating plants	279	6.8	19.6	43.5443	2.50246	5.34558	5.97852	73.8988	11.0391	0.43	18.8	7.3	278.5	1396	12
FL BiC 1 13	Big Cypris National Reserve	2013-11-29	Florida, US	25°53'29.53"	81°16'14.52"	swamp	586	7.6	20.8	32.7754	1.554	6.19942	87.2612	56.8777	4.75	4.5	23.3	10.8	353.4	1341	68
FL CAL 14 1	Caloosahatchee River	2014-08-06	Florida, US	26°43'37.9"	80°42'10.5"	littoral with cobbles and sand lenses	444	8.6	31	32.7773	5.91976	9.43153	42.3072	57.8393	30.0622	2.16	22.7	12	392.4	1185	56
FL CAL 14 3	Caloosahatchee River	2014-08-06	Florida, US	26°50'22.4"	81°04'51.8"	artifical littoral with large stones and sand lenses	238	6.7	34	51.9694	8.88466	13.1298	71.8717	88.1063	52.445	3.25	22.7	11.9	392.3	1182	56
FL CAL 14 4	Caloosahatchee River	2014-08-06	Florida, US	26°50'09.8"	81°05'14.4"	littoral, parts cased	724	7.5	35.5	52.253	8.31225	13.1178	77.9317	90.4887	57.43	3.34	22.7	12	392.4	1185	56
FL CAL 14 5	Caloosahatchee River	2014-08-06	Florida, US	26°47'21.7"	81°18'33.6"	stillwater area with floating macrophytes	550	7.4	34.7	25.8369	6.21116	7.00007	74.7814	45.348	30.7692	3.35	22.7	12.7	398	1256	60
FL EG 3a/b 14	Everglades	2014-08-02	Florida, US	25°26'2.0"	80°45'12.3"	marsh	189	8.1	33.1	5.20335	0.247484	0.654814	33.2984	7.19905	0.1	1.74	23.6	10.3	327.7	1370	63
FL LX 1 14	Loxahatchee River	2014-07-31	Florida, US	26°56'03.0"	80°10'36.4"	root zone littoral of a river	363	7.3	30.6	22.8178	1.38172	2.64499	50.0881	35.8363	6.63826	2.47	23.3	10.4	353.9	1430	42
FL LX 2 14	Loxahatchee River	2014-07-31	Florida, US	26°56'32.5"	80°10'19.2"	littoral of a river	375	7.2	30.5	22.9564	1.35633	2.61639	51.7261	36.2562	7.35767	2.53	23.3	10.4	350.3	1428	41
FL LX 3 14	Loxahatchee River	2014-07-31	Florida, US	26°56'40.28"	80°10'15.94"	littoral of a river	375	7.1	31.7	23.1125	1.36282	2.63318	52.1272	36.0848	7.31995	2.51	23.3	10.4	350.3	1428	41
FL LX 4 15	Loxahatchee River	2014-07-31	Florida, US	26°56'46.91"	80°10'15.42"	root zone littoral of a river	375	7.1	30.5	22.9456	1.37743	2.56857	51.8121	36.1101	7.3262	2.52	23.3	10.4	350.3	1428	41
FL LX 5 15	Loxahatchee River	2014-07-31	Florida, US	26°26'49.8"	80°10'12.4"	littoral of a river	375	7.1	30.4	22.7787	1.39204	2.50397	51.4969	36.1354	7.33246	2.53	23.3	10.4	350.3	1428	41
FL LX 6 15	Loxahatchee River	2014-07-31	Florida, US	26°56'52.5"	80°10'11.1"	stillwater area, littoral zone	375	7	30.5	22.7787	1.39204	2.50397	51.4969	36.1354	7.33246	2.53	23.3	10.4	350.3	1428	41
FL PG 3 13	Shell Creek, Peace River	2013-11-28	Florida, US	26°58'26.99"	81°53'21.8"	littoral of an artifical slack water, with dense terrestrial macrophytes	938	7.9	20.3	71.8837	5.10822	13.3496	103.133	144.985	59.8317	4.22	22.7	12.2	403.8	1275	61
FL PR 15a/b 14	Shell Creek, Peace River	2014-08-08	Florida, US	26°58'26.99"	81°53'21.81"	littoral of an artifical slack water, with dense terrestrial macrophytes	297	7.1	31.2	105.251	5.34837	14.3113	40.992	193.773	34.7427	1.57	22.7	12.2	403.8	1275	61
MX BC 1 14	Laguna Bacalar	2014-08-11	Mexico	18°39'5.8"	88°24'33.07"	littoral of a lake, slight artificially	2360	7.5	31.2	73.16	4.92	99.16	377.884	101.97	1142	3.6	25.7	9.5	160.6	1125	50
MX CA 1 14	Cenote Azúl	2014-08-12	Mexico	18°48'43.3"	90°38'48.1"	hardground littoral of a cenote	575	8	31	9.05229	1.48449	33.42	68.0259	14.7089	15.2276	5.6	26.1	13	217.9	1359	78
MX CG 1 14	Cenote Galeana	2014-08-11	Mexico	19°27'45.6"	88°01'46.3"	littoral, cenote	1300	7.8	31.8	109.963	5.47324	50.92	98.9474	171.1	279.523	3.25	26	11.2	176	1276	52
MX LG 1 14	Lake "Las Garantias"	2014-08-13	Mexico	18°27'11.7"	89°00'42.0"	steep littoral, hard ground	527	7.8	31.4	69.2227	9.92627	7.07763	32.6284	50.0814	5.86632	3.85	25	10.8	192.5	1266	58
MX Pul 1 14	Punta Laguna	2014-08-13	Mexico	20°38'49.4"	87°38'04.1"	littoral, karstified blocks proximate to thick layer of leaf litter and reed belt	1250	8.1	32.1	141.573	3.93	40.04	52.9022	261.12	35.2176	4.05	25.4	11.5	180	1222	52
MX Sil 1 14	Lake Silvituc	2014-08-12	Mexico	18°38'29.8"	90°16'28.1"	littoral of a lake	205	7.8	32.5	10.859	3.67718	2.63541	28.4122	6.76546	4.02108	1.92	26	12.7	220.5	1162	71
MX SiNo 1a 14	Siiji No-Ha Cenote	2014-08-11	Mexico	19°28'33.5"	88°03'15.6"	littoral, cenote	1351	8	32.2	115.951	5.87034	53	92.2955	174.3	293	2.83	25.9	11.3	173	1277	53
