# Supplementary material for: Significance of climate and hydrochemistry on shape variation – a case study on Neotropical cytheroidean Ostracoda
Source: Copernicus journal article supplement (doi:10.5194/bg-15-5489-2018), 2018-09-14
Supplement: Supplementary file 3 [file Supplementary_Table_2.xlsx]

## Sheet: RWs_Females_LV
Specimens	rw1	rw2	rw3	rw4	rw5	rw6	rw7	rw8	rw9	rw10	rw11	rw12	rw13	rw14	rw15	rw16	rw17	rw18	rw19	rw20	rw21	rw22	rw23	rw24	rw25	rw26	rw27	rw28	rw29	rw30	rw31	rw32	rw33	rw34	rw35	rw36	rw37	rw38	rw39	rw40	rw41	rw42	rw43	rw44	rw45	rw46	rw47	rw48	rw49
BR-PTO-4-15-f-LV-#353	0.00787895	-0.00688924	0.00389084	-0.00566714	0.00361962	-0.00191052	0.0011676	-0.00684737	0.00239949	-0.00208193	0.00187229	-0.0067317	0.00049465	-0.00251453	0.000599688	-0.0032448	0.00111284	-0.00182104	0.00194905	-0.00150644	0.00107458	-0.00128958	0.000467298	-5.00829e-05	0.000973041	-0.000617833	0.000479448	-0.000715102	0.000292059	-5.84499e-05	2.12905e-05	-0.000636236	0.000219257	-4.53943e-05	0.000427207	-0.000152486	0.000617315	-5.37971e-05	0.000142124	-0.000202497	7.81747e-05	-0.000338725	1.42881e-05	-0.00056243	0.00051589	-0.00035788	0.000367516	-0.000215283	0.000112661
BR-PTO-15-f_LV-#33-#355	0.0147398	-0.00957789	-0.0115335	0.00417696	0.00386848	0.0113411	0.00664502	-0.00743389	-0.00687668	-0.00025826	-0.00146142	-0.00430761	-0.0011159	0.00133582	-0.00251463	4.50871e-05	7.47121e-05	-3.37501e-05	0.000103889	0.0014531	0.000239531	0.000206362	-0.00098491	-0.000776972	0.000416573	0.000391902	-0.00055677	-0.00158758	0.000197305	0.000245873	-4.66363e-05	-0.00052947	-0.000224569	-0.000422265	0.000315193	0.000517523	-0.000317304	0.000293151	-5.15152e-06	-0.00018602	-0.000386367	0.000134398	0.000278956	0.000223849	-0.000139268	-0.000319688	-7.65814e-06	-0.000234759	-0.000175779
BR-PTO-4-15-f-LV-#35-#359	0.0129803	-0.00409911	0.00184957	-0.00332104	-0.00221043	-0.00393039	0.00365853	-0.00339848	-0.00417404	-0.000486457	-0.000677367	-0.00244541	-0.00171052	0.000347523	-0.000739641	0.0018108	-0.00106389	0.000286707	8.98733e-05	0.000425372	0.000225009	0.000477346	0.00037853	0.0027239	-0.000342847	-0.000153892	8.40915e-05	-0.000412343	0.00052101	0.00023367	0.000407499	0.000834077	-0.000177432	-0.000406075	-0.00055945	0.000792889	0.000143325	-0.000243664	-0.000163821	0.000527264	-0.000573267	0.000111101	-0.000766082	7.80611e-05	0.000409278	-0.000215743	0.000135218	-5.8678e-05	-0.000123942
BR-PTO-4-15-f-LV-#34-#356	0.0100594	-0.00611087	0.0187642	-0.00350016	-0.00999712	0.0107529	-0.0042127	-0.00472115	-0.00316142	0.00163014	0.000543278	-0.000345808	0.00243608	-0.000509814	-0.00144363	-0.00218961	0.00336034	-4.03655e-05	-0.00120386	-0.00112405	-0.00157531	0.000137343	-0.000709284	0.00119453	0.000675204	0.000893823	0.000161798	-5.58432e-05	0.000310561	-0.00081513	-0.000882731	0.000145642	0.000289653	-0.00091686	0.000178727	-6.11006e-05	0.000296861	-6.36122e-05	-0.000920935	0.000101767	-0.000112877	-0.000177647	-7.73731e-05	8.46951e-05	2.44313e-05	-1.08467e-05	-0.000679828	4.63934e-05	-1.27537e-05
BR-PTO-4-15-f-LV-#360	0.0104502	0.00730052	0.00549982	0.00452741	-0.00154868	0.00393401	0.00326823	-0.00520019	-0.00537961	0.00171493	0.00129864	0.0033855	0.00505443	0.00445164	0.000501913	0.000802932	0.000844215	-8.64006e-05	0.00186315	-0.00067263	0.000203776	0.00169724	-0.00146416	-9.03674e-05	-0.00124711	-7.63531e-05	-0.00247736	-0.00111032	-0.000661117	0.000265804	-0.000354028	-0.000361014	0.000123247	0.000140541	-0.000452062	-0.000251906	-8.19702e-05	0.000972051	0.000551743	0.000348319	1.99164e-05	0.000138663	4.02497e-05	-0.000566941	7.16957e-05	6.79197e-05	-0.000185739	6.08199e-05	-9.61373e-05
MX-SiNo-1a-14-f-LV-#206	-0.0155256	-0.0373111	-0.00702719	0.00423613	0.00421705	-0.0063133	0.0127255	0.0100523	0.00236191	0.00439187	-0.00169846	0.000576165	-0.00409109	-0.00217018	0.000493336	0.000155812	-0.00152956	-0.00134565	0.00158104	-0.000720558	-6.00992e-05	0.000137653	0.00270843	-0.000372736	-0.0010049	0.000923836	0.000480554	-0.000929748	-0.000539295	0.00045192	-0.000723061	0.000495891	0.000167726	0.000727826	-0.00012121	0.000532876	0.000128892	0.000450161	-0.000171276	-1.0754e-06	0.000338962	6.81282e-05	0.000227731	-0.000125877	3.24875e-05	-2.69132e-05	5.46583e-05	-0.000281206	-7.95833e-05
MX-SiNo-1a-14-f-LV-#205	-0.038468	-0.0136228	-0.00248185	0.0259748	0.00846042	-0.00431201	-0.00894474	0.00136684	0.000132117	0.000198384	-0.000372084	0.00140156	0.00209629	0.000720245	-0.00227093	-0.00157256	0.000255373	-0.00309167	0.00130299	-0.00113148	0.00038435	0.000229254	-0.00117818	0.000647304	0.000706345	-0.000421824	0.000693281	0.00052152	-2.52316e-05	0.000299759	0.000682653	-0.000466202	0.000517509	0.000125079	0.00102737	-0.000261057	-0.000755943	0.00011671	0.000279132	-0.000240595	0.000233787	0.000385509	-0.000206795	-0.000558694	-0.000168844	-0.000135115	-6.93602e-05	-1.9303e-05	-0.000261836
MX-SiNo-1_#12_f_LV	-0.0365989	0.0104579	0.00339467	0.00403481	0.0053934	-0.00362887	-0.000371132	0.00372391	-0.00405421	0.000134176	0.00368066	0.00201318	-0.000867141	0.000365073	0.000493227	-0.000423542	3.2831e-05	-0.00175017	-0.000291583	-0.00159917	0.00179641	-0.00156681	-0.000271229	0.000925324	0.00141666	0.000814991	-0.00078291	-0.000233457	-0.000672561	-0.000256048	-0.000562921	0.000527485	-0.000639952	3.55882e-05	-0.00010548	-0.000159987	-0.00048947	-4.70378e-05	-0.000316928	-0.000162323	0.000718715	0.000261996	0.000164056	-0.000340042	-0.000130791	-6.99193e-05	-0.000170057	-0.000404796	0.00034465
MX-Sil-1-14-f-LV-#275	-0.0149929	-0.00630608	-0.00735072	-0.00520396	-0.0114364	0.00654484	0.00140531	0.00121046	-0.00425347	-0.00154996	0.00423155	-0.00511212	-0.00122282	-0.000144371	0.00465639	-0.00129731	-0.00368976	-0.00214408	-0.000865379	-0.000326484	-0.000454553	-0.000616819	0.000559521	0.000697301	0.00129975	-0.000473637	-0.000810992	0.000544587	0.000103882	-0.000268087	0.000120983	0.000465235	-0.000371876	-0.00106644	0.000171522	-3.19353e-05	0.000213514	0.000123177	-9.7528e-05	-0.00108524	-3.46967e-05	0.000395954	-4.70748e-05	0.000192965	0.000487723	0.000234648	-1.62651e-05	0.000235042	1.39841e-05
MX-PuL-1-14-f-LV-#170	0.00528604	0.0241233	-0.0184125	0.00481527	-0.000803565	0.00496558	0.00569661	0.00242814	-0.000839126	0.000208614	0.00197812	0.000638834	-0.00315732	0.000348175	-0.00121041	-0.00246199	-0.00154402	0.000569453	-0.00182729	-0.000605956	-0.00117957	0.000267591	-0.000722685	-3.59995e-05	-0.000522062	-0.000444883	0.000759305	-0.000696757	-0.000170615	-0.000752997	0.000246572	-0.000188126	-0.000104308	6.98593e-05	9.96418e-05	-0.000522873	-2.98629e-06	-0.000959849	0.000665435	0.000626271	-0.000110272	8.5024e-05	5.16111e-05	-7.30854e-05	-0.000574597	0.00014092	-0.000272161	-0.000354633	9.87757e-05
MX-PuL-1-14-f-LV-#169	-0.0403827	-0.00382346	-0.00804418	0.00790571	0.00395571	-0.00189056	0.00714659	-0.00644033	0.00832404	-0.00450966	0.00547436	-0.00284322	0.00332147	0.000612461	-0.00271229	0.00038131	-0.00339276	-0.000582333	-0.00138737	-0.000819047	-0.00177128	7.66455e-05	-7.17752e-05	-0.0017552	-0.000477243	0.000711323	-0.000824276	0.000912897	0.000786392	0.000947075	0.000807769	0.000618226	-0.000110584	-0.000434929	-0.000214784	0.000252913	0.000181082	9.79253e-05	-0.000248295	0.000280158	0.000542235	-0.000223756	-0.000131105	-1.43156e-05	0.000184133	-0.00011952	-0.000483906	9.98838e-05	0.00024556
MX-PuL-1-14-f-LV-#140	0.019088	0.0153926	0.00143014	0.0141218	-0.000335454	-0.000231253	0.00506082	-0.00355853	0.00706685	0.000567264	-0.00371758	0.00442161	-0.0056569	0.00177789	0.000235242	0.00300954	-0.000465209	-0.000420241	0.0006217	0.000408946	-0.000272084	-0.000307838	-0.00216969	-0.000180502	-0.000321343	0.000191107	0.000840172	0.000148105	0.000256009	-0.00106813	-0.000367681	-0.00037843	-0.000372788	0.000395741	-0.000577318	-0.000478758	-0.000171675	0.00070709	-0.000525127	-0.000136484	-0.00044511	-7.00314e-05	0.000425584	-0.000468342	-9.37261e-05	-0.000207245	-0.000418766	0.000304814	0.000207969
MX-PuL-1-14-f-LV-#134	0.0134233	0.0203605	-0.00345363	0.00648263	-0.00416301	-0.00186419	0.00410291	0.00131453	-0.00130339	-0.00133448	-0.00180693	-0.00122529	-0.00346527	0.000497942	0.00216843	-0.00113148	-0.000543321	-0.00256525	0.00232164	-0.00153528	-0.0018422	-0.000100978	-0.000834037	-0.000938582	-0.00187348	0.000589874	-0.00018027	0.000536591	0.000252944	-0.000886974	-0.000442055	-0.000152213	-0.000321297	0.000372614	-0.000208864	0.000194475	0.000454258	0.000413818	0.000624087	-0.000368915	0.000521073	-9.79308e-05	0.000136843	0.000415217	3.92188e-05	0.000632626	0.000270167	-9.46553e-05	0.000167535
MX-PuL-1-14-f-LV-#133	0.00846039	0.0247399	-0.00736813	0.0020304	0.014425	-0.00690858	-0.00196579	0.00147436	0.00438833	0.00390346	0.00236774	-0.000949522	-0.00433494	0.000158871	0.000876084	-0.00406734	0.00157382	0.00262275	2.95055e-05	0.00257429	0.000295359	0.00114431	0.00126879	-0.000549727	0.00115254	0.000420678	-0.00126041	-5.93016e-05	-0.000458999	-0.000516061	7.73008e-05	0.000346815	0.000887775	-0.000263907	-0.000393041	-0.000476085	-0.000331076	3.29283e-05	-0.00028868	-1.94537e-05	-0.00090702	-1.78398e-05	4.58989e-05	0.000266871	0.000289756	-8.95181e-06	0.000126781	5.08375e-06	0.000193255
MX-PuL-1-14-f-LV-#132	-0.00467458	-0.0117119	-0.00378123	0.0143967	-0.00371198	0.000409139	-0.00462513	0.00182256	0.00484831	0.00219328	0.00497181	0.000312715	0.001637	0.00140949	0.00101072	0.000999704	0.00319559	0.00192867	1.47271e-05	0.00262116	-0.000864817	-0.000360852	-0.000513226	-0.00090734	-9.71983e-05	-0.000371266	0.000980194	0.000571975	-0.000568687	-0.00058886	-0.00072645	0.000789825	0.000459684	-0.000307192	-0.000351293	-7.12125e-05	-0.000554922	-0.000635573	-0.000385959	0.000157584	0.000182042	-0.000218589	-4.47048e-05	8.35222e-05	0.000470026	-7.78336e-05	0.000265318	0.000274174	-0.000209306
MX-PuL-1-14-f-LV-#131	-0.00813449	0.0331246	0.00155502	-0.000148301	-0.00237793	0.00613542	-0.00630188	0.00431036	0.00280625	-0.00392208	-0.000228898	0.00165442	-0.000209875	-0.00341797	-0.00244915	0.000227081	-0.00203933	0.00292322	-0.00274543	0.00144543	0.00223258	0.000311212	-0.000668457	6.99112e-05	0.000651234	0.000438282	-0.000204942	-0.000742547	0.00119403	-5.18161e-05	0.000279476	-9.56665e-05	0.000938105	0.000618413	-0.000582295	-0.000317117	0.00078458	-0.000355058	0.000323868	-0.000295675	0.0001364	0.000309932	-3.1116e-05	-0.000447693	8.90579e-05	4.34587e-05	0.000118381	3.19892e-05	0.000343389
MX-PuL-1-14-f-LV-#129	0.011136	0.0180048	-0.0149792	-0.00325569	0.00941022	0.000128444	-0.00314296	0.00628445	0.00382593	0.00236123	-0.00271342	0.00351352	0.00510621	-0.000820024	-0.00383757	-0.00160478	7.01701e-05	-5.80951e-05	0.000468103	0.00140056	-0.00145669	0.000401001	3.90235e-06	-0.000988493	6.26704e-05	-0.000990741	0.000766504	-0.000503274	0.000263786	0.000526833	-0.00111402	-0.000142578	0.000370769	0.000224685	-0.000207564	0.00115307	0.000816828	-5.85369e-05	-0.000435254	-0.000751458	9.27775e-05	0.000361972	-0.000537431	-0.000535039	-0.00029854	-0.000363265	4.32549e-06	8.95696e-05	4.23056e-05
MX-PuL-1-14-f-LV-#128	0.00573137	0.0221359	-0.00955335	0.00558041	-0.00633352	0.00767208	0.00314156	-0.00110607	0.00107971	2.81621e-05	-0.00306185	0.00106962	-0.00114794	-5.45902e-05	0.00175992	4.23149e-05	-0.00103993	0.00331784	0.000295988	-0.000459788	-6.68621e-05	0.000308778	0.000669689	0.00114907	0.000439555	-0.00013658	0.000702595	0.000504558	-5.87584e-05	-0.000483289	0.000806336	-0.000539821	0.000972645	0.000107786	0.000144623	0.000601916	3.72827e-05	0.000581316	-0.000262783	0.00016741	0.000725727	-0.000406595	-0.000227243	0.000359848	-0.000222999	-0.00020899	2.79214e-05	-0.000549258	-0.000353564
MX-PuL-1_#12_f_LV	0.00780678	0.0236959	-0.0117398	-0.000719486	0.00580495	0.000631474	0.00842567	0.00454922	-0.00647596	-0.000129295	0.000409495	0.000275814	-0.00177904	-0.00175812	0.000858409	-0.0017494	-0.000976468	-0.00215179	0.00090725	-0.00139331	-0.000851758	0.00125762	2.26624e-05	-0.000181295	0.000843858	0.000926888	-0.000154449	0.00135669	0.000115706	0.00119292	-0.00116056	-0.000589279	4.29592e-05	0.000289554	0.000524783	-0.000753882	-0.000642544	4.59142e-05	-0.000354823	8.73381e-05	-0.00028865	-4.75039e-05	-0.000270188	-0.000261636	0.000343005	3.30052e-05	-8.9745e-06	-7.59885e-05	-0.000538924
MX-LG-1-14-f-LV-263	-0.0101908	-0.00211299	-0.00959885	0.00371464	0.00733409	0.00103539	-0.00559501	-0.00494313	0.00145315	0.000730235	0.00436801	-0.00184822	0.00270714	-0.00317423	0.00123294	-0.00301989	0.00231781	-0.000380433	-0.000754178	-0.000987096	0.000924636	0.000193053	-0.000580289	-0.00127874	0.000273113	0.000949713	-0.00142905	0.000478145	-1.85309e-05	-0.000956943	2.58987e-05	0.000626118	1.18209e-05	-9.99197e-05	-0.000736159	0.000216983	-0.000676722	0.000180378	0.000683558	-8.66097e-05	-0.000289507	-0.000681846	0.000719544	0.000196663	-0.000381669	-0.000256712	1.21194e-05	-0.000164581	-0.000260932
MX-LG-1-14-f-LV-#266	-0.00759432	-0.00694782	-0.0138548	-0.0107069	0.000727109	0.00432003	-0.00704497	-0.00484592	0.00561989	-0.000920883	-0.000375666	-0.00306583	0.00156216	-0.00617773	-0.000736599	0.00194129	0.00121144	9.49563e-05	0.00179705	0.00105954	0.00152182	-0.00179043	1.48899e-05	-0.00149567	-0.000881944	0.00160222	0.000757877	-0.000201217	0.000151449	0.000389254	-0.000339885	-0.000727491	-0.00077322	-0.000224266	-9.50163e-05	-5.13049e-05	0.000210011	-7.92446e-05	-5.55183e-05	-0.000101904	-0.000340075	0.000185513	9.8637e-05	-0.000102291	-0.000208814	0.000341307	-8.51764e-05	-0.000230514	-0.000125772
MX-LG-1-14-f-LV-#264	-0.00784255	-0.0117775	-0.0136474	-0.00652426	0.00118413	0.00708648	-0.00163695	-0.00306025	0.00420566	-0.00244319	0.00365618	-0.00343414	-0.0020983	0.00026276	-0.00242383	0.00149666	0.000360064	0.000126847	0.00161269	0.00254095	-0.000504724	0.000404875	0.000443009	0.00343554	-0.00188144	0.00237846	-0.000280033	2.62855e-06	0.000136868	8.73547e-05	-0.00114275	0.000550136	0.000872877	-0.000449682	0.000810599	-5.1302e-05	0.000236076	-0.000105413	0.000248323	3.37356e-06	0.000164382	-0.00011763	7.66458e-05	-0.00027842	-0.000481539	-2.89405e-05	0.000122222	0.000164871	0.000368253
MX-LG-1_#12_f_LV	-0.00840418	-0.000857736	-0.00180253	-0.00946948	-0.00125412	0.00828326	-0.00179328	0.00569661	-0.00450836	0.00155267	0.00381589	-0.00107333	0.00159413	0.000922865	0.00128246	0.00189468	-0.00081144	-0.000898919	0.00270194	0.00157195	-2.48667e-05	0.00232376	0.00051538	0.000851347	0.000192271	0.00033097	0.000806438	0.00024657	0.000124904	5.52612e-05	-0.001013	-0.000248385	-0.000667423	0.000198587	-0.000355997	0.000123559	-0.000549458	-2.22257e-05	-7.61765e-05	-7.96741e-05	-0.000172396	-0.000213248	0.00043597	4.35748e-05	-0.000156981	-0.000225633	0.000259353	-0.000267021	0.000340725
MX-CT-1-14-f-LV-#273	-0.0391982	0.0119723	-0.00605328	-0.00900107	0.015368	0.00353796	0.00327687	-0.00132441	0.000310212	0.00431664	0.00156727	-0.00722258	-0.00278614	0.000574994	-0.000216886	0.00530429	-0.000468968	0.000318102	-0.0010489	0.000248009	-0.000635322	4.10601e-05	-0.00113435	-0.000505448	-0.000852414	-0.000786636	-0.000175198	0.000120295	-0.00095543	-0.000508099	0.000470406	-0.000804397	0.000622087	-0.000282255	0.000435303	0.000191138	0.000357575	0.000174337	-0.000612176	0.000630296	0.000307222	0.000146646	-9.14621e-05	3.69814e-05	-0.000113606	0.000463194	0.000172733	0.000498367	-0.000282258
MX-CA-1-14-f-LV-#246	-0.0183351	-0.0131056	-0.00130281	0.0100787	0.00954924	0.00472818	-0.000638232	0.00297511	0.00383351	-0.00137666	-0.000246977	0.0038853	-0.000852679	0.00224354	-0.00165576	-0.000369647	-0.00178449	0.00252227	0.00291987	0.000225202	0.000503758	-0.000451055	-0.0012843	0.000284125	0.00108873	0.000718605	-0.00111994	-0.00016631	0.00069357	-0.000219107	0.00120548	0.000396982	-0.00073053	-1.44574e-05	-0.000353027	-0.00010377	-9.34385e-05	-0.000661584	-6.55932e-05	0.000299747	-0.000186621	-0.000495115	-0.000471302	0.000177736	0.000252996	0.000118699	0.000254867	6.2723e-05	2.58105e-05
MX-CA-1-14-f-LV-#245	-0.0109654	-0.00221794	0.00603895	0.00618341	-0.00818957	0.00381751	0.00756943	-0.0029379	-0.0037398	0.00393684	-0.00453588	-0.00465244	-7.40047e-05	0.000871712	0.000467042	-0.00020005	0.00304854	-0.0019635	0.0019458	0.00155501	-0.00122505	0.00134844	1.70701e-05	-0.0011815	-4.99265e-05	0.000544909	6.69824e-05	-0.000416355	-0.000462369	0.00075943	7.80989e-05	0.0003637	0.000695091	0.000272947	-0.00108686	-0.000354217	-0.0004021	-0.00109945	0.000107779	0.000101649	0.000206206	-5.16761e-05	-0.000333419	-2.28097e-05	-0.000216714	4.58573e-05	0.000232201	-3.71656e-05	3.76355e-05
MX-CA-1-14-f-LV-#244	-0.00658462	-0.0127558	0.013259	0.0025653	-0.0047358	-0.00660472	0.000223039	0.00310964	0.000295401	-0.00160944	-0.000140794	-0.00292839	0.000479758	-0.00239177	-0.00113192	0.000768405	-0.00232539	-0.000851666	0.000759518	0.00126887	0.00119669	-0.000420659	-0.00190835	-5.42573e-05	0.000360524	-0.000265375	-0.000128508	0.000466962	-0.00100263	-0.000886402	-0.000115831	-0.000404321	0.000260532	0.00102952	0.000737106	0.000453099	0.000137934	-0.000785714	0.00106536	0.000257484	-0.000538434	0.000458376	4.4685e-06	0.000193981	0.000481641	-1.82477e-05	-0.000460893	-0.00012306	0.000116534
MX-CA-1-14-f-LV-#238	-0.0138509	-0.0217062	0.00197453	0.000781862	-0.00310223	-0.00460364	-0.000660308	-5.19598e-05	0.00252028	0.000919099	-0.00383235	0.00317548	-0.000688206	0.00328218	0.00234166	-0.000527713	-0.00337152	-0.000596597	-0.00104974	0.000842004	0.00071043	0.00181244	-0.000713119	-1.59486e-05	0.000117915	0.00123208	-0.00034239	5.85057e-05	-1.39632e-05	-0.000676748	0.000202299	-0.000491577	0.000763341	-0.000363284	-0.000455827	-0.000470239	0.00052585	0.000378492	-2.48932e-06	0.000226761	-0.000370349	0.000402233	-0.000172049	-0.000449927	7.28229e-05	-0.000292412	0.000659331	-0.000200697	-0.00026601
MX-CA-1-14-f-LV-#236	-0.0237736	-0.00732622	-0.00760694	0.0125835	-0.00737562	0.000149833	-0.0026988	-0.00306645	-0.00177632	-0.000581478	-0.000675271	0.00266916	0.00144088	-0.00358449	0.00371784	-9.82144e-05	0.00143999	0.000810254	0.000294063	0.000225804	-0.00218048	-0.00180638	-0.000848817	-0.000638608	-0.00046788	-0.000315712	0.000422511	-0.000623969	-0.000365864	-6.35684e-05	-0.000227284	0.00113071	-6.84215e-05	0.000350265	-0.000330798	-0.000693973	0.000572887	0.000443626	0.000275765	0.000469791	-0.000485878	0.000755985	-0.000474716	0.000443953	-7.89143e-05	-6.0126e-05	0.000169765	-0.000150469	-0.000174478
MX-CA-1-14-f-LV-#235	-0.0135443	-0.0136945	0.00852609	0.0065969	-0.012958	0.00236358	0.00280478	-0.000145364	-0.000567321	-3.24853e-05	-0.00577138	-0.000586603	-0.00228586	-0.00230968	0.00363063	0.000979592	-0.000206272	0.00220219	-0.00265352	0.00199842	0.00156591	0.00113929	0.00087788	-0.00108491	0.000328364	0.000639883	-0.00132599	0.000310227	0.000306839	-0.000730153	-0.000662971	7.22498e-05	3.49955e-05	0.000805507	0.000533631	0.000389599	-9.27585e-06	1.50667e-05	0.000118633	-0.000145773	0.000510776	-0.000199831	-0.000590263	5.28924e-05	-0.000369226	-0.000175607	-0.000571308	0.000270302	-7.66831e-05
MX-CA-1-14-f-LV-#234	-0.00146058	-0.0132285	0.00296855	-0.00533098	-0.00935802	-0.00451474	0.0043527	-0.000391219	0.000884897	0.00458687	-0.0033665	-0.000511179	-0.000232016	-0.00105264	0.00209398	-0.00137385	0.00173194	0.00209994	-0.00316817	0.0024737	-0.00244571	0.000488134	-0.00200181	0.000479408	-1.29157e-05	-0.00053681	-2.71434e-05	0.000205821	-0.000750236	-0.000117101	0.00101052	0.000132003	-0.000599373	-0.000451157	0.000661963	-0.000103034	-0.00033899	0.000109133	7.49799e-05	-0.000740223	0.000144238	-6.67254e-05	-5.6508e-06	-0.00085076	-0.000313645	-0.000159257	0.000345337	0.000279275	0.000279298
MX-CA-1-14-f-LV-#231	-0.0226803	-0.0192803	0.00142683	-0.000464448	-0.00172241	-0.00101735	-0.00537375	0.00354324	-0.00180054	-0.00373598	-0.00292133	-0.00124137	-0.00151809	-0.00269151	-0.00200422	-0.000340799	-0.00234372	-0.000479105	-0.00331973	0.000941622	-0.00158618	0.000500877	-5.73199e-05	-0.000224569	-0.000319666	-0.00111618	0.000645938	-0.00156164	9.9686e-05	-0.000523894	-0.000953119	-0.000823369	-0.000518797	0.000250346	0.000132482	-0.000921235	-0.000304688	0.000306644	-0.000382906	0.000585046	-0.000201474	-0.000658663	-0.000130879	0.000782245	-1.83879e-05	-0.000331891	-1.30085e-05	-0.000337503	0.000366393
MX-CA-1_#32_f_LV	-0.0236203	-9.37691e-05	-0.00647812	-0.00310133	0.00834567	-0.00944915	0.00236945	-0.00213706	-0.00242131	-0.00250671	0.0025171	0.0030197	0.00135545	0.000996701	0.00197131	0.00137172	-4.70906e-05	-0.00375787	-0.00100861	0.00173374	0.000287576	0.00193728	-0.0010632	0.000267853	0.000390813	-0.000474613	-7.45596e-06	0.000199268	0.000429009	-7.39742e-05	-0.000494742	-0.000298555	-0.000531752	0.000339389	-0.000197701	-0.000319134	0.000544916	-0.000537329	-0.00115901	-0.000323074	-0.000325789	-0.00040028	-0.000208394	-0.000207924	0.000346545	0.000662851	-6.92787e-05	-6.88489e-05	-4.66974e-05
MX-BC-1a-14-f-LV-#184	-0.02098	0.00254159	0.00919686	-0.0147196	-0.00364424	-0.00406766	0.00176356	-0.00324558	0.00769757	-0.00398573	-0.00259832	0.00140806	-0.00182417	0.000934343	0.00193952	0.00186908	0.00246166	-0.000975018	0.000383971	-0.00266357	-0.00248995	-0.00109582	-0.000878458	-0.000386688	0.00161781	-0.00116006	0.00117527	-0.000218774	0.0012409	-0.00032951	-0.00104817	-0.000160972	0.000546309	-0.000571824	8.08805e-05	0.00046372	-0.000422803	-2.01417e-05	0.000384644	0.000428606	2.84332e-05	3.87048e-05	0.000299983	-0.000364611	1.73551e-05	-0.000174065	0.000166594	-0.000143655	-0.000216254
MX-BC-1a-14-f-LV-#183	-0.0207376	0.00419916	-0.000111998	-0.0179112	0.0015843	-0.00527543	0.00329966	2.48022e-06	0.00107931	0.00263117	-0.0080929	0.00117272	0.0041871	-0.000606075	0.000456419	-0.000865202	0.000627885	0.00425243	0.00290439	-0.00234803	0.000785439	-3.34558e-05	-0.000198208	-0.000346631	-0.000103811	1.71486e-05	-0.00024773	0.00121461	0.000721524	-6.92848e-05	-0.000339073	-0.000122688	3.35766e-05	-0.000559867	-0.000707968	-1.78376e-05	-0.000711043	-0.000161539	-0.000375791	5.8275e-05	0.000371807	0.000624115	-0.000103775	0.000476965	-0.000448564	0.000365077	-0.000274372	8.13607e-05	0.000352942
MX-BC-1a-14-f-LV-#181	-0.0254997	0.00914953	0.01063	-0.00717411	-0.00190831	-0.00938244	0.00132618	0.000541122	-0.00263442	0.00508848	0.000867474	0.00123816	0.0012694	-0.00150449	-0.00238881	-0.00171661	-0.00115044	0.00132329	0.00073974	-0.000964409	-0.000393821	-0.000772265	0.000249534	0.0009057	-0.00103951	0.000599207	-0.000443127	0.000589896	-0.000846659	0.000350022	0.000672471	-0.000256852	-0.000500382	0.000315182	0.000160238	0.000726067	6.09332e-06	-0.000621506	-7.45121e-05	0.00042953	-4.85591e-05	-0.000117745	0.0001516	-0.00012029	-0.000241936	-0.000109646	-0.00015262	7.89046e-05	-0.000388021
MX-BC-1a-14-f-LV-#178	-0.0233593	0.00513881	0.00745614	-0.000181446	-0.00492305	-0.00822888	0.00252267	-0.00210884	0.00148762	0.00079192	0.00134196	0.00315447	-0.00220155	0.00256945	0.000736897	-0.000819541	0.00137389	0.00183036	-0.00139842	6.74359e-05	0.000863254	-0.00224583	0.000870484	0.00050799	-5.06036e-05	-0.000304962	-0.000865677	-0.00153919	0.000282707	0.000907974	-0.000497669	-0.000860804	7.08943e-05	-0.000479302	-0.000269924	-0.000185398	0.000369652	-0.00010636	0.000417275	-0.000495816	0.000240391	-0.000180664	2.73286e-05	0.00025395	-0.000109635	8.58327e-05	1.50315e-05	1.42778e-05	-3.10571e-05
MX-BC-1a-14-f-LV-#177	-0.0234986	0.00751279	-0.0011571	0.00795262	-0.0104646	-0.00300345	0.000489039	0.00480626	-0.00152418	-0.00279895	-0.00272581	0.000144001	0.00124532	0.00325285	-0.00264284	-0.000786576	0.00214789	0.0020265	0.00203062	0.00151438	0.000863176	0.00133268	0.00145434	-0.00130177	0.000397642	0.000549614	0.00151386	6.59386e-06	0.0004469	0.000502836	0.000798628	0.000783941	-0.000303116	-0.000332127	0.000823659	0.000164219	0.00012632	0.00112927	-0.000133674	0.000151934	-0.000591518	5.44232e-05	0.000170705	1.77113e-05	0.000362011	0.000279079	-0.000463017	-0.000450254	0.000316633
MX-BC-1a-14-f-LV-#175	-0.0228374	0.0035666	0.00878779	-0.00710911	-0.0118401	-0.00206321	0.00636127	0.00456988	-0.00764919	0.00168053	-0.00179609	-0.000519621	-0.000703911	-0.00142063	0.000647377	0.00197173	0.00186668	0.000105407	0.000755808	-0.000100265	0.00121663	-0.000536251	0.000260596	-0.000206404	0.000307613	-0.000107689	-0.000980505	-0.000359012	0.000117202	0.000386845	7.61427e-05	-0.000608063	0.000334942	-0.000684475	4.00434e-06	-0.000109201	0.000636761	-0.000299429	0.000469958	-0.000148437	-0.000595051	-0.000199248	1.72908e-05	-0.000312493	-6.66373e-05	-0.000250965	-0.000339283	8.35501e-05	0.00030892
MX-BC-1a-14-f-LV-#174	-0.0241574	0.000757537	0.0102152	0.00489763	-0.00815496	0.000111077	-0.00479759	-0.00164053	-0.0047395	-0.00624791	-0.00449706	0.00460933	0.000498402	0.00195247	-0.00220402	-0.00167518	0.000466602	-0.000806133	-0.000844877	0.00186332	-4.86501e-05	-0.00127806	0.00167826	1.99769e-05	-0.000491701	-0.000567327	-0.000595852	-0.000780174	0.00100764	-0.00040895	0.000485596	-5.64394e-05	0.00045398	0.000164458	0.000185804	0.000306856	-0.000293552	-2.04475e-06	-0.000569261	-1.10367e-05	0.000319231	-1.33593e-06	0.000857901	0.000231389	-2.23592e-05	0.000190326	0.000538619	0.000119607	-0.00052239
MX BC-1_#12_f_LV	-0.0457703	0.0230079	-0.00573272	0.000189166	-0.000900347	0.00137748	-0.00380482	0.000243787	-0.00588608	0.00416804	0.00204552	-0.000747752	-0.000435888	0.0036688	0.000661401	0.00068294	0.00258528	0.000436811	-0.000314271	-0.00193436	0.000699838	0.000155377	0.000326608	0.000503214	-0.000255076	0.000421058	0.00177821	-0.00075316	6.04502e-06	-0.000609998	-0.000257739	0.0001205	0.000250605	6.48585e-05	0.000218505	0.000184809	0.000384587	-5.10229e-05	0.000553263	-0.000163058	-0.000511547	-0.000140812	0.000111221	0.000343236	-1.76497e-05	7.89609e-05	0.000283526	0.000431393	-0.000126974
FL-PR-15a-14-f-LV-#120	0.0180322	0.00914526	0.000152962	0.0111913	0.00723287	-0.00452939	-0.00547656	-0.000990797	-0.00186901	-0.00830835	-0.00547503	-0.00193128	-0.00258728	-0.000289987	0.000829688	0.00074072	-0.000321268	0.00102193	-0.000335156	-0.000342359	3.20688e-05	-0.00148408	0.00141444	-0.000775532	-0.00126817	-0.00130611	-0.00112198	0.000655842	-0.000210809	0.000245441	-0.000778995	0.000665822	-0.000369521	-0.000729273	0.00105477	0.000148267	-0.000661524	-5.39001e-05	0.000307982	9.57145e-05	-0.000348156	-0.000364552	-0.000553731	-0.000547572	-0.000467068	0.000618922	0.000612839	-7.09045e-05	0.000337004
FL-PG-3-13-f-LV-#18-#283	0.0149945	0.000193399	0.00688644	0.00329692	0.00452995	-0.010996	-0.00306244	-0.003572	-0.00112915	0.00080264	-0.00329524	-0.00311879	-0.00279575	-0.000575655	-0.00118022	-0.00100043	-0.000759496	-0.0027026	0.000179489	-0.00134923	0.00172986	0.00273876	-0.000314479	0.000665216	3.54216e-05	-0.00132484	0.000950535	-0.00129367	0.000135497	0.000185948	0.000698017	0.000859189	-0.000721176	-4.71465e-05	-0.000348172	-0.000356838	-0.000258738	-0.000245893	-0.000256456	-0.00027335	5.30525e-05	0.000292756	-9.29938e-05	0.000203101	-0.000842661	-0.000277647	-9.06328e-05	0.000295378	-3.15852e-05
FL-PG-3-13-f-LV-#16-#282	0.0201812	0.00961971	0.0127182	0.00596698	0.00440594	-0.0058382	-0.00699198	-0.00112725	-0.00416043	0.00339617	-0.00128094	-0.00298916	-0.00338891	-0.00117318	0.00172265	0.00030793	0.00353713	-0.00231974	-0.00175675	0.00181127	0.00173348	-0.000409391	-0.000608678	0.000164861	0.000285158	0.000443707	0.000627547	0.000720186	0.000873387	0.000171681	-0.000420638	-0.000297148	0.000265077	-0.000193994	-9.77364e-05	0.000743256	0.000129265	0.000126766	-0.000126686	0.000614361	0.000443838	-0.000409687	1.20902e-05	-0.000365823	0.00025257	0.000437831	-0.000434122	-0.000417264	-0.000148464
FL-LX-4-14-f-LV-#36	0.00284254	0.00894543	0.000263935	0.0156541	-0.00648375	-0.00320056	-0.000674285	0.000863529	-0.000257953	-0.00266841	0.00214221	-0.000915497	-0.00167638	0.00182289	0.000520341	0.000357062	0.000546335	0.00309738	0.000297728	-0.00216559	0.000732337	-0.000385556	-0.000222933	0.000679739	-0.00136287	0.000397561	0.000874326	0.00132713	-0.00098812	-0.000198135	-5.62895e-05	-0.000245288	-0.00159949	-0.000157065	-0.00037653	-2.01988e-06	0.000795661	-0.00048417	-0.000144627	-0.000219719	0.000289528	-0.000528442	0.000424688	-0.000163595	7.31398e-05	-0.00091758	0.000119864	-3.72339e-05	-0.000147158
FL-LX-4-14-f-LV-#33	-0.00323265	-0.0171826	-0.0102318	0.00115793	-0.00270487	0.0110681	-0.00683706	0.00588	-0.0014861	-0.00530324	0.0025912	0.00582608	-0.00483122	0.00197023	-0.000109609	0.000644904	0.000379418	0.00185129	-0.00168684	-0.000643929	0.00015646	0.000622888	0.000362393	-0.00136013	0.000381775	-0.00115611	-0.000309028	0.000713061	-0.000860836	0.00103965	-0.000461134	-0.00113541	-0.000391767	-0.000716357	-0.00074698	0.00046848	-0.000268668	-3.86522e-05	0.000189469	6.53984e-05	0.000233762	-0.000274616	-0.000510397	-0.000153551	0.000148709	-0.0001728	-0.000146614	5.97292e-05	0.000114705
FL-LX-4-14-f-LV-#30	0.00195966	-0.00381364	-0.00920265	-0.0214902	0.00287087	0.00117815	-0.00812583	-0.000891857	-0.00349469	0.0001439	-0.00415104	0.00498388	-0.00270024	-0.00271293	0.000731527	0.00376465	-0.0011338	-0.00297835	-0.000507184	-0.00140252	-0.00152963	-0.000161736	0.000641514	0.000591442	-0.000456851	-0.000308819	-0.00052466	0.000139416	0.000152556	-0.000503538	0.00113008	-0.000130455	0.000118481	-0.000363934	-0.0010231	0.000121489	-0.000234449	0.000122134	0.000300323	-0.000112065	0.000117946	0.000394013	0.000313938	4.93079e-05	0.000572296	-7.93036e-05	-0.00014283	-3.60097e-05	0.000256729
FL-LX-3-14-f-LV-#24	-0.00178744	-0.00108801	0.00976192	-0.0150552	0.00718621	-0.00179301	-0.00520245	0.00403599	-0.00178762	0.000579144	0.00531822	-0.000498345	-0.0035726	-0.00360621	0.000781193	-0.0017515	-0.00052432	0.000666014	0.000988551	0.00173032	-0.000101776	0.00255187	-0.000544207	-1.14791e-05	-0.00102654	-0.00238826	-0.000753249	0.00137575	0.000558261	0.000579717	0.000881902	0.000281469	0.000294664	-0.000178743	8.84119e-05	-0.000191003	0.000707393	0.000201399	-4.33873e-05	0.000511333	0.000264659	-5.10546e-05	0.000680625	0.000105801	-0.00046353	-0.000115133	-6.96435e-06	-0.000232158	-0.000106951
FL-LX-3_#38_f_LV	0.0171312	-0.0206729	-0.00823429	0.00606698	-0.00327848	0.00252672	-0.00311538	-0.00392861	0.00556532	0.00334059	0.000680743	0.00335672	-0.00734606	0.00363656	0.000874612	-0.00261867	0.000115471	-0.00181506	0.000412696	-0.0015318	0.00159338	-0.000800763	-0.000281914	0.000422279	0.00115717	-2.17491e-05	-0.00047722	0.000277931	-0.000135083	0.000598148	0.000130656	0.000395257	0.000181915	0.00020182	5.16012e-05	0.00162419	0.000207943	-3.10251e-05	-0.00025472	0.000473904	-0.000635282	0.000351037	0.000186097	0.000135913	-0.000356327	0.000201138	-0.000166315	0.000211169	0.000224385
FL-LX-1-14-f-LV-#6	0.0225538	-0.0174843	-0.00438921	-0.00980885	-0.0142006	-0.00492226	-0.00286651	0.00391588	0.000991676	0.00217935	0.00163559	0.00730684	0.000528155	-0.00443858	-0.0012426	0.00118858	0.00137987	-0.0007057	0.00233951	-0.00210079	0.000414444	0.000179832	-0.000829304	8.96264e-05	0.000763061	0.000468209	-0.00016691	0.000593096	0.000162981	0.0015543	-0.000359563	-0.000295721	0.000601635	0.000151893	0.000407692	-0.000692764	0.000281492	2.50799e-05	5.2343e-05	0.000284898	-0.00030463	-0.000811853	-0.000139665	0.000413906	-0.000282062	0.00014794	0.000263873	0.000596564	-9.9608e-05
FL-LX-1-14-f-LV-#14	-0.00217437	0.00404352	0.0222053	-0.0134652	0.0066967	0.0150685	-0.0078967	-0.0036911	0.00356446	0.00076791	-0.00165419	3.53822e-05	-0.0044087	0.00146475	-0.000265684	-0.00324466	-0.0013892	-0.00237813	0.00215873	0.00077059	0.00155875	0.000465324	0.00049621	-0.00185301	-0.00081979	0.000958336	0.00114784	0.000163803	-0.000707423	0.000149801	0.0010222	-0.00024438	-0.000349159	-0.00016101	0.0004151	-0.000737275	-0.000283484	-0.000113228	0.000262778	-5.81058e-05	0.000328503	0.000168308	-0.000453344	5.73076e-05	0.000280206	4.5493e-05	-0.000141177	0.000257244	-0.000142296
FL-LX-1-14-f-LV-#10	-0.000556732	-0.00417496	-2.54156e-05	-0.0155716	-0.00633268	0.00736903	0.00193979	-0.000849928	0.00130237	-0.000595371	0.00406723	0.00477371	-0.00067281	-0.0029694	0.00100278	-0.0040865	0.00110608	-0.000969688	0.00136702	-0.000198894	0.000163068	0.000602406	-0.000526814	-0.000260172	0.000299188	-0.000112142	-0.00042013	-0.000502155	-0.000278379	-0.00077267	0.000101117	0.000642644	0.000273408	0.000800878	0.000551441	0.000220837	-0.00011103	0.000325332	-0.00048341	-0.000133795	0.000685267	0.000188954	7.54885e-05	-0.000173176	5.92053e-05	-0.00021884	0.000359942	-0.000125197	0.00021222
FL-EG-3b-14-f-LV-#49	0.00427313	0.00518138	-0.00928869	0.0010816	-0.00566353	-0.000963234	0.000309541	0.00208296	0.0019052	0.00219715	0.00126699	0.00246898	0.00522801	-0.00097749	0.0018665	-0.000161958	-0.00104971	0.00105194	0.00320191	0.00238114	0.000910922	0.000946248	0.00108042	0.00141317	0.000118132	-0.000974042	-0.000304575	0.000237635	0.000912711	-0.00179104	0.000679416	-0.000828327	-0.00105235	4.8937e-05	0.000607599	0.000500179	-0.000146284	0.000459326	0.00030351	-0.000160257	-0.000218262	-0.000329627	-0.000393483	0.00013898	-2.60313e-05	0.000229954	-3.18936e-05	0.000234731	-0.000315662
FL-EG-3b-14-f-LV-#53	0.00122625	0.0106824	-0.0063915	-0.00374901	-0.00187648	-0.00329454	0.00198899	-0.0020033	0.00323225	-0.00104532	-0.00197643	-0.000720354	-0.0014207	-0.00194608	-5.61508e-05	-0.000830753	-0.000644521	-0.000396369	0.00217679	0.000421965	-0.00149328	-0.00174004	-0.00227786	0.00138284	-0.000697728	-0.000173423	-5.96329e-06	0.000556991	0.0014674	0.000515203	0.00049877	0.000909976	2.83696e-05	-2.43511e-06	8.9959e-05	-0.000438305	-0.000214818	0.000657437	0.000260391	-5.16047e-05	-0.000172543	-0.000299337	-0.000379917	5.20769e-05	0.000293069	-0.000409021	-0.00029592	-7.05562e-05	-5.00465e-05
FL-EG-3b-14-f-LV-#51	0.00543416	0.0114406	0.00615126	-0.00815963	-0.0188826	-0.00163772	0.00866605	0.00231234	0.00463672	-0.000722869	-0.000995163	-0.00236686	0.00131489	0.00226272	-0.00294192	-0.00337941	-0.00140658	-0.0010897	-0.00179974	0.0010832	-0.000355351	0.000221208	-0.0006894	-0.00125887	-0.000570979	-0.00129495	0.000146375	0.000454079	-0.000996638	0.0010266	7.5301e-05	0.000337632	0.000520777	8.93597e-06	0.000189149	0.000279675	-4.46683e-05	3.54796e-05	3.12276e-05	-0.000194161	-0.000321268	-0.000461301	0.000705091	0.000247823	0.000419066	0.000145458	1.61208e-05	0.000227623	0.000137843
FL-EG-3a-14-f-LV-#46	0.00357095	0.00503546	-0.00438208	-0.0072636	-0.00706435	3.49198e-05	-0.0112859	-0.00316625	0.0017222	0.00473661	-0.00288717	-0.00280463	0.000416292	0.00375051	0.00126288	0.000682753	-0.000149832	-0.000523952	0.000967594	0.000382832	0.000420722	0.000515422	-0.00104338	-0.00134927	0.000583511	-7.56167e-05	0.000121001	-1.79773e-05	-0.00036366	0.00103915	-0.00077937	0.000655954	-0.00115721	0.000289603	0.000199582	-1.57883e-05	0.00106992	0.000296836	0.000147946	-0.000341053	0.000384491	0.000183337	-0.000183122	0.000422096	-0.000103669	3.83218e-06	0.00013527	-1.00735e-05	-0.000167833
FL-CAL-14-5-f-LV-#115	0.0158555	0.00652659	0.0156605	-0.00963603	-0.000297917	-0.00552295	-0.00441876	0.0080459	0.00447142	-0.00350162	0.003146	-0.00526723	0.00312618	0.00268345	0.00123172	-0.00138849	0.00376034	-0.00248924	0.00021654	0.000977726	-0.00274983	0.000462376	0.00167563	-0.00016695	-0.000244109	0.000387196	-0.00079731	-0.000120534	7.66969e-05	-0.000582675	0.000163024	-0.000203403	-0.000391773	0.000366491	-0.00076716	0.000513738	-6.58093e-05	4.94166e-06	0.000367378	0.000497694	0.00011919	9.8974e-05	-0.000790949	-0.000116436	-3.24229e-05	-0.000247663	-4.4172e-05	-0.000109174	3.3437e-05
FL-CAL-14-5-f-LV-#114	0.00874405	0.00792076	0.00115415	0.0151514	-0.0130281	0.00424421	-0.00181732	-0.0036461	0.00182949	0.0101776	0.0013516	-0.000263581	-0.000644729	-0.00408205	-0.00181353	-0.000530664	0.00175277	0.00186433	-0.00344072	-0.000678853	-0.00211055	3.45197e-05	5.41559e-05	0.00118211	0.00069366	0.000588739	-0.000392362	7.5059e-05	0.000311141	0.00115824	0.000792379	-0.000670973	-0.00124642	0.000640178	0.00010527	0.000134907	-0.000227912	-0.000164893	-0.000258851	0.000292775	0.00013391	0.000569451	0.000118994	-3.19538e-05	0.000434256	0.000577794	0.00056533	-0.000329837	0.0002677
FL-CAL-14-4-f-LV-#105	0.0043529	0.0165477	-0.00207267	-0.0078469	0.00638445	-0.00299091	0.00511129	-5.01057e-05	-0.000596371	-0.00039704	0.00252689	0.00142525	-0.00085976	-9.2467e-05	-0.00436009	0.000671091	0.00371632	-0.00203908	-0.000787176	-0.000800919	0.00108376	-0.00226674	0.000263242	0.000492144	0.00100644	-0.000407857	-0.000973672	6.92578e-05	-0.00195224	-0.000922737	1.74011e-07	0.000276911	4.27685e-05	0.00035571	0.000311828	-0.000520214	9.6859e-05	0.000574385	-0.000479338	-0.000317348	0.000152118	-8.8991e-05	-0.000662127	0.000577284	-0.000238823	-0.000138464	-3.26273e-06	-2.97807e-05	0.000202436
FL-CAL-14-4-f-LV-#104	0.00390256	0.0113463	0.00550705	0.00302293	-0.00151788	0.00525063	0.00599353	-0.0027852	0.000755727	0.000268793	-0.0007801	0.00122745	0.00156537	0.000862804	-0.000263638	0.0026518	0.00202486	-0.00408803	-0.000498425	-0.000666591	0.00137023	-0.00054017	0.00180307	-0.000553535	-0.000641418	0.00069504	-1.07736e-05	0.000472123	0.00149188	0.000573126	0.00123221	-0.000715976	-5.70303e-05	0.000807713	0.00018582	-0.00013346	-0.000368614	-8.39549e-06	3.12942e-05	0.000199163	-8.03896e-05	-0.000226195	-0.00019014	0.000126154	8.45669e-05	-0.000542429	0.000484932	0.000356053	0.000419189
FL-CAL-14-4-f-LV-#103	0.0135087	0.00511569	-0.0101451	-0.00292051	-0.00717556	-0.00172127	-0.000827719	0.007862	-0.00209965	0.00308967	0.00170346	-0.0058701	0.00060633	0.00289288	-0.000439645	-0.000150373	-0.00225772	0.000197847	-0.000261003	0.00196214	0.00198161	-0.00245171	-0.00135332	0.000190077	-0.000278581	-0.000620267	-0.000164909	0.000752702	0.00129233	0.00100345	-0.000752828	-0.000433802	0.000259055	-0.000302996	-0.00022928	-0.000102982	-0.00115153	-0.000119945	-3.14162e-05	-0.000224127	4.7359e-05	0.000716631	4.77935e-05	0.000380636	-0.000110548	-0.000483947	0.000122342	-0.000111743	-0.000213797
FL-CAL-4_#22_f_LV	0.0211234	0.000814336	-0.0209236	0.00532161	0.00155817	-0.0016155	-0.00172214	0.00235434	-0.0020788	-0.00147212	-0.00808444	-0.00355977	0.00449725	-0.00292687	0.000188981	-0.000660113	-0.00190705	-0.00168661	-0.00183419	0.000956094	0.000219188	-0.00091444	-5.01972e-05	-2.778e-05	0.00172703	0.000756244	1.29607e-05	0.000177718	-0.00166565	-0.000596153	-9.32188e-05	-0.000386359	-4.88336e-05	-9.2725e-05	-0.000133342	0.000304307	-2.17435e-05	0.000315588	8.75423e-05	0.000869471	0.00030508	-2.43924e-05	0.000445623	-3.39701e-05	0.000207555	-0.000175478	3.04658e-05	0.000671591	2.99742e-05
FL-CAL-14-3-f-LV-#77	0.00218476	0.0064025	0.00653432	-0.000882526	0.00197646	0.00960183	0.00108129	0.00207278	0.00310305	-0.00253914	-0.000698256	-0.000705782	-0.00117104	-0.00108292	-0.00370065	0.0029499	-0.00211999	-0.00129362	0.00122311	-0.000694465	-0.00169875	-0.000174488	-0.000167894	0.000192899	0.00163707	-0.000836422	-0.000741712	-0.000821495	8.01607e-05	-0.000136975	-0.000283311	0.000858668	-0.000274406	0.000882986	-0.000493052	0.000624734	-6.01117e-05	-0.000479159	0.000389279	-0.000721653	-0.000254581	-0.000513739	9.91985e-05	-6.83547e-05	-0.000123961	0.000376876	-5.76482e-05	-7.61742e-05	-0.000601954
FL-CAL-14-3-f-LV-#76	0.0160735	0.00130653	-0.00390101	0.0159807	-0.00406956	-0.00623173	-0.00729483	0.00454935	0.00833523	-0.000161407	-0.00625401	-0.00656354	-0.000324133	0.000607116	-0.000380476	0.00189365	5.18136e-05	0.0012656	0.00262472	-0.00371492	-0.00102806	0.0024042	0.00181559	0.000690078	0.000995954	0.000521996	-0.00104454	-0.000279988	-8.4909e-05	-0.000394723	6.40709e-05	-0.000377737	0.000579501	-0.000495331	0.000261364	-0.000760478	0.000332942	-0.000452645	-0.000146899	-0.000363553	0.000300151	0.000102794	0.000470057	0.000177548	0.000351232	1.16941e-05	-0.000101169	2.38844e-05	4.93974e-05
FL-CAL-14-3-f-LV-#75	0.0178595	0.00911178	-0.00268834	-0.00914234	-0.00461097	-0.00787055	-0.00336139	0.0032952	0.00158315	0.0030325	0.00661912	0.00371285	0.000435386	-0.000927317	-0.001622	0.00673599	0.000452933	-0.00107033	-0.00254583	-0.000429232	-0.000913609	0.00102306	0.00116276	-0.00197571	0.000166041	0.0011125	-0.000155446	-0.000830374	-0.000404218	-0.000222698	0.00102484	0.000434716	-0.000329308	-0.00096368	0.000717594	0.000168153	-0.000428179	0.000166202	0.00018228	-0.000140341	-0.000384514	0.000298201	0.000194372	-0.000167362	-0.000219453	-0.000216129	-6.51028e-05	-0.000210181	-0.000243457
FL-CAL-14-3-f-LV-#73	0.0189636	-0.00391071	-0.0117991	-1.55479e-05	-0.00250669	-0.00571473	-0.00300323	0.00357015	-0.000482481	0.00151882	0.00204959	0.00136863	0.000178719	0.0020141	-0.00146141	-0.00269725	-0.000761875	-0.00181628	0.000514486	0.00275005	-0.000238731	-0.00196007	0.0012362	0.000940049	-0.000511782	-0.000115334	6.00213e-05	-0.00180424	0.000578586	0.000193191	-8.60469e-05	0.000119788	-0.00062655	-0.000271066	-0.000510529	-0.000780894	3.48303e-05	0.000130953	0.000220984	0.000579105	0.000792602	-9.37304e-05	0.000341091	-0.000325627	0.000124723	0.000391981	-0.000462885	0.000546624	-0.000129385
#447-FL-CAL-14-3-f-LV	0.0225713	0.0175206	0.029577	0.00626601	0.00425502	-0.00138495	-0.000663964	0.00440823	-0.00131649	-0.00199986	0.00703582	0.00035877	0.00168812	-0.00121914	0.00607018	0.00109706	-0.00614061	0.00258298	0.00152435	-0.000616041	-0.00123645	-0.000862361	-0.000986996	-0.000680485	0.00100925	0.00165576	0.000900901	-0.00207453	-8.41201e-05	0.00081624	8.71748e-05	0.000139465	0.000333327	-0.000258309	0.000482144	0.000355317	-0.000377945	7.91464e-05	-0.000421695	0.000244343	0.000181525	-0.000139099	-2.95052e-05	0.00015914	-0.000291365	4.02807e-05	4.27617e-05	0.000270989	0.000156898
FL-CAL-3_#57_f_LV	0.0155443	0.0108284	-0.00866201	0.00623358	0.00387595	0.00477577	0.00272201	-0.00106131	-0.00244479	0.00399341	-0.00104258	0.00709772	0.00262329	-0.000780841	0.000800009	0.00193945	0.00017922	-0.00101436	-0.00110916	-0.00106013	0.00199662	0.00132207	5.57056e-05	3.23252e-05	-0.00103012	-0.00133452	0.00039633	-0.000320139	-1.05585e-05	-0.000112834	-0.000709307	0.00159481	0.00034054	-0.000699262	0.000900903	6.08274e-05	-1.48554e-05	-0.00076203	0.0005336	0.000412761	0.000721099	4.23197e-05	-0.000103588	0.000216143	0.000836501	-0.000223703	-4.83758e-05	-4.91392e-05	0.000116544
FL-CAL-14-1-f-LV-#69	0.00115537	0.00757441	0.00190642	-0.00697825	-0.00249682	0.00140955	-0.00548633	-0.0047837	0.00109463	-0.00241175	-0.00478257	0.000195537	0.000528417	0.00178514	0.000429843	0.00160213	-0.00122502	-0.00142065	-0.0018858	0.000818755	-0.00166015	-0.000335573	0.00131626	0.00138034	-0.00038293	0.000325109	0.000272639	0.000553725	-0.000947676	0.000469467	0.00058717	0.000119897	0.000384586	0.000544185	0.000154154	-5.12425e-06	-0.000494416	-0.000216024	-0.000354979	-0.000444822	-0.000105518	-7.63471e-05	-0.000119541	0.000317638	-0.000143043	-0.000230459	-0.000341709	-8.50747e-05	-0.000108018
FL-CAL-14-1-f-LV-#66	0.00804454	0.0108386	0.00767174	0.0166716	-0.00143042	0.00146184	-0.000848941	-0.0039143	-0.00139812	-0.00342362	-0.000696677	0.00250725	0.00485175	-0.00181629	0.00299779	0.00143377	-0.00247746	-0.00343745	-0.00101197	0.00156979	0.0013866	-0.00150256	0.00131681	3.1186e-05	-0.000468766	0.000150838	0.00010067	0.00146154	-0.000649899	0.000568637	0.00013834	0.000537386	0.000497258	-0.000153476	-0.000696773	-0.00016255	0.000729675	-0.000105902	-0.000461331	-1.65112e-05	-0.000447973	8.14316e-05	0.000294823	-3.61643e-05	-0.000461377	-4.78132e-05	0.000118235	-0.000222839	1.83777e-05
BR-CU-1-15-f-LV-#2	0.0105628	-0.00971339	-0.010264	-0.0116926	0.00506883	0.000201656	-0.00739339	-0.00403631	-0.00880739	0.00534254	-0.00246617	0.0010474	0.00126491	0.00272812	0.00186823	-0.000601305	-0.0019415	0.00314496	0.00430553	-0.000471249	-0.00176479	-0.00275188	0.000837066	-0.00101492	-0.000848355	-0.000814278	-1.38717e-06	-0.000395201	-0.000876928	-0.00026275	0.000800335	-0.000121199	0.000554959	0.000723517	0.000276082	-0.000108492	-7.50593e-06	-0.000633314	-0.000587564	-0.000140224	-0.000367091	-0.000411978	0.000158841	-0.00054916	0.000261022	-9.64381e-05	-0.000273543	-0.000271704	0.000280501
BR-CU-1-15-f-LV-#1	0.019298	-0.0166811	0.00876474	-0.00782313	0.00575425	-0.00620942	0.00305043	-0.00776755	-0.00782077	0.00742727	0.00327225	-0.000658766	-0.0016817	0.00274346	-0.00483946	0.00161843	-0.00359896	0.00283064	-0.00129215	0.000785915	-0.000695354	-0.00110864	0.00187974	-0.0013381	0.00224543	0.00029381	0.000922752	0.00188302	0.00118013	-0.0011093	-0.000578709	0.000567449	9.11772e-05	0.000374614	-0.000217794	-0.000645081	0.000419545	0.000368457	0.000615635	3.59987e-05	0.000387472	-0.000100344	-0.000141344	-0.000163921	-0.000124602	-2.96133e-05	0.000238715	4.62676e-05	-6.34222e-06
BR-ITA-4-15-f-LV-#282a	0.0107666	-0.0164585	0.00111239	0.0160578	0.00238765	0.00335222	-0.00514212	0.0016336	-0.00957949	-0.00410439	0.00265596	0.000123888	0.00150608	0.00148096	-0.00165488	-0.000758736	0.000714548	0.000508515	-0.00118863	-0.00157096	-0.00274258	0.000854483	-3.28503e-05	0.000805828	0.00025387	0.00026459	0.000327828	0.000933024	-2.50821e-05	0.000746416	0.000392346	-0.000198847	0.000781256	0.000377894	-0.00011745	-0.000337772	0.000283744	0.000327572	0.000535055	-0.000378344	2.03587e-05	0.000167885	1.65766e-05	6.78026e-05	-0.000343921	0.000336648	-0.000282712	3.56056e-05	4.5715e-05
BR-ITA-4-15-f-LV-#2-#288a	0.0207733	-0.006171	0.0178709	-0.000329924	-0.00562467	-0.00213518	-3.91878e-05	0.00391493	0.00295055	-0.00499282	0.00510076	0.00234749	-0.0016103	0.00159472	-0.00319089	0.000491832	0.000499578	0.000689545	0.00113252	8.38685e-05	-0.000236456	-0.000940289	-0.000432853	5.67019e-05	-0.00179781	0.000351144	-0.000593497	0.000797765	-0.000547608	-0.00101912	-0.00081994	-0.000544993	0.000102992	0.000177036	0.000267022	-0.000155313	4.68936e-05	-6.36459e-05	-0.000380926	-6.02726e-05	-0.000163716	0.000960425	1.05181e-05	0.000245542	0.000284796	2.15377e-05	0.000126942	-4.79952e-05	-0.00019414
BR-ITA-4-15-f-LV-#4-293	0.00362407	-0.00613728	0.00395276	-0.00778973	0.0026489	0.00197136	0.0050079	0.0023508	0.00108393	-0.00713432	0.000645075	-0.00217559	0.00224906	0.00109561	-0.000531052	0.0028066	0.00192871	0.00137404	0.00231905	0.00124311	0.00157773	-0.000111718	-0.000942465	0.00153277	0.00196874	-0.000892356	0.00143413	0.000162397	-0.00181331	0.0006048	0.000945878	7.68051e-05	1.00626e-05	-4.79739e-05	-0.000725963	-1.04062e-05	-2.80875e-05	0.000610242	0.000368544	0.000329904	0.000350851	4.35239e-06	0.000126747	6.52575e-07	-6.21783e-05	0.000378724	0.000310097	-0.000152585	0.000246619
BR-ITA-4-15-f-LV-#5#295	0.0105558	-0.00474786	-0.00197839	0.000946594	0.000619503	0.00132556	0.0115235	-0.00307858	0.00380245	-0.00116714	0.00242547	0.00394768	0.000416665	-0.00254265	0.000682961	-0.00462904	-0.00051867	-0.000578684	-0.000797716	-0.000228784	-3.22264e-05	-0.000126726	0.00200749	0.000292272	-0.00011711	-6.45812e-05	0.00174082	1.41758e-05	-0.000647745	-0.000345653	0.000492204	-0.000824125	8.42911e-05	-0.00129781	-0.000454128	-0.000181904	0.000144297	-0.000286343	0.000381286	-0.000223776	-0.000235619	0.000217873	-0.000395741	-1.74046e-05	-0.000242053	0.000255594	-0.000191829	-3.85072e-05	-0.000327085
BR-ITA-4-15-f-LV-#6-#297	-0.00343515	0.00410688	0.00664981	-0.0152795	0.0123505	-0.000536084	0.00298081	-0.00615427	-0.000448121	-0.00774458	-0.00332202	0.00145534	-0.00121827	-0.00227808	0.000710167	-0.000227	0.00161049	0.0053736	-0.00152159	0.000405566	0.0004771	0.00118343	0.00117282	0.000905142	-0.000100711	0.000667492	0.000289195	6.30194e-05	-0.00054543	0.0011184	-0.000862377	0.000703038	-0.000686008	0.000815007	-8.9444e-05	-0.000285981	-0.00053388	0.000116566	0.000285533	-0.00014253	-0.000163162	0.000366762	0.000404279	-0.000298663	0.000513448	-1.21777e-05	-0.000137415	0.000338774	-0.000444631
BR-ITA-4-15-f-LV-#7-#299	0.0143464	-0.0124591	-0.00428628	0.00664577	0.0149308	-0.0143633	-0.00170609	-0.00913228	-0.000503121	-0.000137433	0.00417803	0.00143407	0.000183043	-0.000834921	0.00140079	0.000796898	0.00091667	0.00140346	-0.00105508	0.00116914	0.000145576	0.000804313	-0.00109518	0.000105938	-0.00108462	0.000310236	0.000667882	-0.000667929	-0.00011565	0.000620443	0.000249554	-0.000969742	0.000793778	0.000364681	-0.000196407	0.000696924	-0.000399643	0.000119491	0.00038519	-0.00103984	0.000386596	-0.000236352	-0.000153322	0.000722757	0.000423496	7.21537e-05	-9.09156e-05	-7.25693e-05	0.000216574
BR-ITA-4-15-f-LV-#8-#300	0.0234714	-0.0140343	-0.00988325	0.00219002	0.00156734	0.00365865	0.00796898	-0.00385731	0.00569456	-0.00328684	0.00370015	0.000254952	0.00170595	0.00284156	0.00426957	0.00329694	0.00311795	0.00063483	0.000605592	0.00152444	0.000154096	-0.00028011	0.00102293	-0.000276464	0.0010884	-0.00154472	-0.000424839	-6.22325e-06	0.000795768	0.000167469	0.000401903	-0.000332418	-0.000213533	0.000755601	0.000795242	-0.000860219	0.000210809	-0.000820261	-0.000125671	0.000135378	0.000191752	0.000463281	0.000480132	0.000129552	-0.000390779	3.19613e-05	-0.00037505	-0.000171137	-2.9828e-05
BR-ITA-4-15-f-LV-#12-#309	0.0319946	-0.021238	-0.0132443	-0.0151666	-0.00362429	-0.0016947	0.00296726	0.0108297	-0.00446489	-0.00577101	-0.00210413	-0.00300088	0.000974391	0.0019518	-3.25023e-06	-0.000221354	0.00228854	0.00143709	-0.00343636	-0.00266804	0.00216902	-0.000486237	-0.00229934	-0.000935089	-0.00106145	0.00167414	0.000367471	-0.00051752	0.000741514	-0.000645309	0.0014676	0.000703077	0.000269247	0.000178919	-6.30452e-05	-0.000181306	0.000115549	-0.00028428	-0.000513009	-0.000242113	0.000162304	-0.000235088	-0.000198393	-0.000180728	-1.10563e-05	0.000337964	0.000106815	-0.00020616	-0.000342757
BR-ITA-4-15-f-LV-#13-#310	0.00138168	-0.00986593	0.0116853	-0.00369999	0.0369196	0.00914178	0.00306119	0.0113755	0.00345408	0.00410926	-0.00537432	0.000802265	0.00307306	0.00287577	0.00294693	-0.0016999	0.00177506	-0.000172499	-0.00388221	-0.000710443	-0.00121665	-0.00127928	-0.000169864	0.000825217	-0.000158368	0.000315743	-0.000214035	0.00030235	0.000669118	0.000550046	4.08679e-05	-1.00099e-05	-0.000500196	5.0864e-05	0.000563622	1.11612e-05	0.000731436	0.00015805	0.000337593	1.60409e-05	-0.000428458	-7.53393e-09	0.00033696	0.000396896	2.41403e-05	-0.000191754	5.64295e-06	7.1446e-05	6.20918e-05
BR-ITA-4-15-f-LV-#14-#312	0.00178842	-0.00565852	-0.000850726	0.0107859	0.0040305	0.00159394	0.00217594	8.29196e-05	-0.00853599	-0.00542375	0.00476096	-0.00308753	-0.000219415	-0.00317585	-0.000457343	-0.00108722	0.00175302	0.00104818	0.000851611	-0.00218969	-0.000138514	0.000693815	0.000611664	-0.000986076	-0.000527613	-0.000877956	0.000816708	0.000157494	0.0011656	-0.000913657	2.27588e-05	-5.20807e-05	-0.000141905	0.000417016	-0.000273202	0.000654457	-7.85284e-05	1.0269e-05	-0.000411823	4.32863e-05	-0.000291119	0.000538932	0.000150186	-7.65477e-05	2.95188e-05	-9.23691e-05	4.59747e-05	0.000797787	0.000357991
BR-ITA-4-15-f-LV-#15-#315	0.0162502	-0.00460413	0.00869542	0.00689731	0.00899539	-0.000807367	0.00369943	-0.00699272	-0.00283861	-0.00214681	-0.00275922	-0.000360823	0.001742	-0.00153495	-0.00341915	-0.00045235	-0.000732287	0.00151237	0.00168208	-0.000574473	0.000195455	0.000816249	-0.00055933	-0.000648698	0.000120127	-0.000494518	-0.00126078	-0.000724081	-6.87952e-05	0.000260542	-0.000450368	-0.00040436	-0.000375109	-0.000973199	0.000257098	9.00384e-05	0.000637416	-7.84506e-06	-0.000361761	0.00028919	0.000181084	0.000206893	-3.46331e-05	0.000233066	0.000114623	-0.000240596	0.000276217	-0.000224468	-0.000157115
BR-ITA-4-15-f-LV-#17-#317	0.00579719	-0.0164466	0.0231815	0.0174222	0.00484667	0.0106967	0.00300337	0.00655334	0.00407385	0.00943132	-0.000930377	-0.00183757	0.00157187	-0.0036975	-0.00173439	0.00255939	-6.64818e-05	0.000241014	0.000332506	-0.000457021	0.00144495	-0.000936888	0.000218989	0.000327649	-0.00134924	-0.00152814	0.000215539	-7.06144e-06	-2.95553e-05	-0.00042725	-9.96335e-05	0.000339587	0.000219099	-0.000514383	-0.000630794	-0.000341295	-0.000449414	0.000454722	-0.000110838	-0.00060806	-0.00014505	-0.000283863	7.46473e-05	-0.000170355	0.000110955	0.000327038	-7.80169e-05	-8.7357e-05	-4.60984e-05
BR-ITA-4-15-f-LV-#16-#319	-0.00192973	-0.00309573	-0.00458252	-0.00842639	-0.00868402	0.00201751	-0.00484519	-0.00462435	0.00721831	0.00275287	0.00487619	-0.00546908	0.00374911	0.00230376	0.00143484	-0.000829161	-0.00283253	0.001537	-0.0036421	-0.00459901	0.00223349	0.000586693	0.00119438	0.000668559	-0.00104514	-0.00155709	-7.79897e-06	-0.000574812	-0.000163033	0.000256026	-0.000605456	-3.15177e-05	0.000322738	0.00104087	-0.000236218	-0.000305246	-0.000306408	0.000603248	-0.000152201	0.000393575	-0.000425245	-0.000118016	-0.000336875	-0.000398237	3.87228e-05	0.000174512	-7.33305e-05	-7.26391e-05	-4.90852e-05
BR-EM-3-15-f-LV-#23-#331	0.0070442	-0.00723458	0.00557055	-0.0121331	0.000663657	-0.00210051	0.00165951	-0.00530485	0.00237389	-5.08013e-05	-0.00243243	0.00415985	0.00507934	0.00305749	-0.00120586	-0.00144358	-0.00301422	-0.00134633	-0.00165936	-0.000528902	0.000401036	0.00132576	-0.000741212	0.000297758	-0.000103544	0.000921515	0.000579253	0.000537279	3.96524e-05	-0.000938161	-0.000926144	-0.000221849	-0.000343766	-0.000278259	0.000183049	0.000245103	-0.000370066	-0.000519124	0.000228162	3.00653e-05	-0.000108959	-0.000131236	0.000258463	0.000168788	-0.000215914	0.000415681	0.000240913	-0.000243067	0.000403089
[truncated: 36 more columns]

## Sheet: RWs_Females_RV
Specimens	rw1	rw2	rw3	rw4	rw5	rw6	rw7	rw8	rw9	rw10	rw11	rw12	rw13	rw14	rw15	rw16	rw17	rw18	rw19	rw20	rw21	rw22	rw23	rw24	rw25	rw26	rw27	rw28	rw29	rw30	rw31	rw32	rw33	rw34	rw35	rw36	rw37	rw38	rw39	rw40	rw41	rw42	rw43	rw44	rw45	rw46	rw47	rw48	rw49
FL-CAL-3_#57_f_RV	-0.00602181	0.0122663	-0.00398327	0.00897833	-0.00497295	0.00878088	-0.00687265	0.00212352	-0.00756518	0.00218722	-0.00385126	0.00101535	-0.000171353	0.000797302	-0.00234734	0.00506326	-0.000893905	2.22993e-05	-0.00123491	0.000219869	-0.000388611	0.00110427	-0.00141689	0.00275133	-0.00116713	1.55344e-05	0.00122418	0.000310322	-0.000430608	4.7297e-05	-0.000249376	0.000249581	-9.44449e-05	0.000538147	-0.000801886	6.57751e-05	-0.000561534	3.59405e-05	0.000576156	0.000337005	-0.000177044	1.53369e-05	-0.000496473	0.000480651	-1.65279e-05	0.000197563	-8.21695e-05	0.000235398	-0.000111171
FL-CAL-14-3-f-RV-#79	-0.0115415	0.0118316	-0.00454166	0.00193749	0.00820195	-0.00675516	0.00691297	0.00469301	0.000127545	0.0055896	-0.00754456	0.0011525	0.000639623	-0.00134983	0.0013526	-0.00289883	0.000357668	-0.00132987	0.00120962	0.00159835	0.00147039	-0.000350046	-0.00301842	0.00182811	0.00101582	-0.00167419	-8.03597e-05	-0.000263673	-0.00081359	0.000862845	-0.00025725	-0.000282772	0.0003645	0.000597853	0.000482152	0.000579465	-5.95607e-05	-0.000646179	-0.000187635	-0.000272536	0.000206987	0.000504281	-0.000441331	-0.000337363	0.000110947	3.64014e-05	0.000449299	-0.000146355	7.09519e-05
FL-CAL-14-3-f-RV-#78	-0.011243	0.00948163	0.0109614	0.00287454	0.0030154	0.00422694	-0.000453787	0.00231805	-0.00141839	0.0054215	0.00201893	-0.00435907	-0.000207795	0.00226113	0.000447113	-9.35499e-05	0.00256586	-0.00100993	0.000893463	0.00281844	0.000982416	-0.000514443	0.00177223	0.000285093	0.000242808	-0.000743016	-0.000634408	0.000819824	-0.00023022	0.000454798	0.00073646	-0.000333503	-0.00055687	-0.00115289	0.000396147	-0.000249743	7.19374e-05	0.000305483	-0.000253959	0.000123554	-1.1838e-05	-0.000350045	-0.000122504	-0.000122778	-7.90817e-05	-1.99708e-05	0.000323191	-0.000378878	0.000305151
FL-CAL-14-3-f-RV-#72	0.00550425	0.0132339	0.0033	0.00320668	0.00101273	0.00720677	0.00296585	0.00251083	-0.00408541	0.00065754	0.00365007	0.00227564	-0.00271103	0.00278817	-0.00209341	0.000971587	-0.00194481	8.13907e-05	0.00119765	0.00171651	-1.61563e-05	5.40058e-05	7.18704e-05	0.000854215	-0.00120594	-2.68537e-05	-0.00189629	-0.00130589	0.000552889	0.00142883	-0.000738554	0.00112467	0.000765644	-0.000801566	0.000190673	0.000282106	-7.23403e-05	0.000399074	0.000281809	0.000284307	-0.00023897	-0.00048925	0.000397342	-0.000136022	-0.000321996	0.000322101	0.000389156	1.38558e-05	-0.000417696
FL-CAL-14-3-f-RV-#71	-0.00111426	0.0107985	0.000644368	0.00143258	-0.000858415	0.00903287	0.000751871	0.00117672	-0.00116883	-0.000431886	0.000885906	-0.00229168	-0.000115034	0.00274694	-0.000600406	-0.0028902	-0.000887758	-0.000602311	-0.00154385	0.00130139	-5.62118e-05	0.000143001	-6.86947e-05	0.000558186	0.00169329	0.000464334	2.65134e-05	-0.000898884	-6.67308e-05	-0.000228863	-0.000688583	8.69536e-05	0.000628082	-0.000131229	-0.000823573	-0.000446674	-0.000175359	0.000663163	0.000220789	-0.000494807	0.000796389	-0.000272673	9.86679e-06	0.000113838	-0.00010234	0.000247118	0.000104207	-0.000696199	-3.91474e-05
FL-CAL-14-4-f-RV-#98	-0.0248941	0.00733368	0.00593989	-0.00193243	0.0096644	0.00404082	0.000127166	-0.000937094	0.000330779	0.00305925	0.00492105	-0.00118839	0.001706	0.00267419	0.00234659	-0.00262447	0.00097472	-0.0018486	-5.97993e-05	-0.001552	-0.00077877	-0.00065906	-0.000928754	-0.000453569	-0.00182994	0.00031731	0.000908698	0.00184146	-0.000837899	-0.000241702	-0.000918913	-0.000751505	8.00678e-05	-0.000888479	-0.000247936	0.0001706	-0.000331081	-0.000633652	0.000219106	-0.000427442	0.00025972	-0.00038241	-0.000271216	0.000246957	-0.000133169	0.000379785	-7.19763e-05	0.000144161	-5.97535e-05
FL-CAL-14-4-f-RV-#100	-0.00762749	0.00910526	0.00691324	-0.000775987	-0.00342549	-0.00518468	0.00306769	-0.00103025	-0.00579767	0.00406558	0.00467151	0.00197798	0.00491219	-0.00159904	-0.00311122	-0.000381691	-0.00200234	0.00111123	-0.00203553	-0.000283118	0.0023673	-0.00153298	0.000328331	0.000890782	0.000904805	-0.000714202	-0.000467124	0.000240691	-9.05042e-05	0.000185127	-0.000220706	0.000534778	0.000235824	-8.68846e-05	-0.000399536	-0.000450838	-0.000285826	-0.00030825	-0.000203657	-9.77999e-05	-0.000121424	-1.28992e-05	4.25432e-05	0.000593997	0.000227979	0.00014413	6.89555e-06	0.000194154	0.000390721
FL-CAL-14-4-f-RV-#99	-0.008187	0.0125486	0.00677418	0.00648103	-0.000835874	0.00143433	0.00135326	0.00468196	-0.00086382	0.00722751	-2.16822e-05	-0.00215424	0.00149611	-0.00311404	0.000760965	-0.00273185	0.000986352	-0.00160966	0.00221618	0.000822962	-0.00164379	0.000278896	-0.000901398	0.000796549	-0.00117181	0.00022362	-0.000385924	-0.000575253	-0.00030739	0.000137088	0.000707008	-0.000313181	-0.00119658	0.000930124	-5.48498e-05	0.000240656	0.000314449	0.000445184	-0.000385615	-0.000266899	0.000157036	6.37088e-05	0.000298348	0.000401567	0.000164168	0.00010759	-6.71811e-05	9.48363e-05	-0.000263721
FL-CAL-14-1-f-RV-#70	-0.0410924	-0.0168757	0.00844297	-0.012989	0.00293314	0.0048517	0.00229336	0.00197676	-0.0013913	0.00133205	-0.000123385	0.00116767	-0.00220111	0.00297901	0.000941327	0.00028656	0.0015515	0.0012542	-4.55359e-05	0.00113297	0.000484528	-0.000595037	0.000206227	-0.000270553	0.00113295	0.000216875	-9.66841e-05	-0.000149007	-0.000247637	-5.94043e-05	-0.000135997	-0.000502023	0.000211037	-0.000530096	0.000460504	0.000421716	1.55641e-05	-7.93729e-05	0.000140808	-0.000437227	-0.000418773	0.00012339	0.00033064	0.000524062	0.000143773	-0.00028767	-2.00552e-05	-0.000229867	-6.45471e-05
FL-CAL-14-1-f-RV-#67	-0.0169972	0.0160161	-0.000246879	-0.00830865	0.0129415	0.0102611	-0.0017156	0.00296165	0.00109912	0.00137913	-1.57318e-05	0.00230098	0.00478709	0.00384169	-0.00267471	3.03846e-05	-0.000523359	0.000294024	-0.000102943	-0.00318184	-0.000605483	-0.00086169	0.000203235	0.00116628	0.00152121	0.000206453	-0.000584892	-0.00131204	-0.000693605	0.000217413	0.00116586	-0.000418348	-0.000159479	2.71121e-05	0.000480845	5.66568e-05	0.000259903	-0.000193798	0.000791257	0.000361121	0.000350627	-0.000116936	0.000185593	-0.000417561	2.82638e-05	-0.000324164	-8.82629e-05	0.000230218	2.27344e-05
MX-SiNo-1a-14-f-RV-#218	0.0388829	-0.00644773	-0.00550644	0.00484498	-0.00166081	0.0106488	-0.000770957	0.00149163	-0.00162417	0.00243869	-0.0105206	0.00128697	-0.00242763	-0.000608909	-0.00567557	1.12066e-06	0.00230704	-0.000991576	-0.00402377	-0.000851262	0.000990356	-0.0011524	-0.000660608	0.000631412	-0.000581476	-0.000532014	-0.000384581	-0.000458998	-0.001106	-0.00117257	0.000256997	-0.000483785	-4.29638e-05	-0.000648572	0.000144582	6.06429e-06	0.000188911	2.30512e-05	-0.000800655	0.000203662	-0.000297037	-0.000269308	-0.000147684	-0.000449035	-0.000175631	5.60874e-05	-0.000190151	8.07055e-05	0.000139578
MX-SiNo-1a-14-f-RV-#217	0.0299347	-0.0139595	-0.0389695	-0.0158812	0.00518824	0.000344303	0.000844679	0.000937507	0.00299772	0.000731814	0.00478284	-0.00284292	5.62765e-05	0.00394376	0.00203476	-0.00194619	-0.000258796	-0.00200706	0.00173475	0.0025948	0.0013004	-0.000630779	-0.000776276	-0.000240215	0.00104709	0.000157986	4.2352e-05	0.00021211	-0.00061499	0.000132839	-0.00044587	-0.000321272	0.000669564	0.000241518	-0.000700242	0.000795653	-0.000382122	0.000383374	-0.000533672	0.000575798	-0.000442761	-0.000106977	3.14606e-05	-8.59429e-05	-2.21837e-06	-0.000207223	0.000119392	0.000525757	-0.000125919
MX-SiNo-1a-14-f-RV-#204	0.00967654	-0.0362336	0.00942655	-0.00780327	-0.00783107	0.00571442	0.0219379	0.00190045	0.00196618	-0.0025078	0.00213813	-0.00213855	0.00267551	-0.000499505	-0.00793247	-0.00179048	0.00136311	0.000545347	-0.000628838	-0.000199862	-0.000690153	-0.00041812	-0.000185634	-0.000267689	-0.000454666	0.000583464	-0.000450844	7.94835e-05	0.000547269	0.000597169	0.000429725	-0.000152543	0.000253065	0.000255448	0.000134856	0.000120422	0.000659137	-0.00065866	0.000147495	-0.000217259	7.26784e-05	-0.000116672	-0.000364723	0.000369145	0.000224377	0.000291041	0.000315034	0.000424644	-7.55613e-05
MX-SiNo-1a-14-f-RV-#201	0.0190124	-0.00364696	0.0127697	-0.00603429	-0.00530013	-0.00465061	0.00525004	-0.000404624	-0.0012955	0.00172483	-0.00288706	0.00210169	-0.00059034	0.00128936	-0.00237541	-0.00357182	0.00283248	5.64521e-05	0.00176223	0.00207919	-0.00145871	-0.000172533	0.00128049	0.000162317	0.00091524	0.000158643	-4.56325e-05	-0.000524411	0.000634682	-0.000801681	-0.000398726	0.000991187	-0.000323188	0.000236748	-0.000818499	-0.000180904	0.000233534	-0.00036685	-2.9118e-06	-0.000225266	-0.000306853	0.000558437	9.0442e-05	-0.000478659	0.00040592	3.28791e-05	-0.00019077	-0.000130599	0.000192771
MX-SiNo-1a-14-f-RV-#199	0.0240462	-0.00588887	0.000747771	0.00117176	0.00180296	0.000858226	0.00188201	0.00450064	0.00277894	0.00707404	-0.00580828	-0.000916632	-0.0047253	0.00149978	0.00193947	-3.21494e-05	-0.000222208	0.00144051	0.00117637	0.000215527	0.00113581	-0.000620098	0.00161949	-0.000864765	-0.000602025	-0.000226137	0.00026213	-0.000128105	-0.000217289	0.00102815	-9.89878e-05	0.000601826	0.000102724	-0.000137542	-0.000340532	-0.000455727	5.24045e-05	-0.000583113	0.000201446	-7.09779e-05	-0.000196681	0.000410594	0.000237144	7.72786e-05	-0.000126852	-0.00018795	3.8142e-05	9.89353e-05	0.000225721
MX-Sil-1-14-f-RV-#276	0.0263624	0.011246	0.000550428	0.00351432	-0.00715603	-0.00858918	-0.00438704	-0.00345186	0.000926521	0.00945381	0.00440523	0.0017668	-0.00524175	0.000607166	-0.00117698	0.0021585	0.00345116	-0.000842154	-0.000270838	0.0025	-0.000356763	0.000274754	0.000828996	0.000440873	-0.0012602	-0.000829137	0.00062798	-0.000277595	0.000884159	0.000182567	9.39202e-05	-0.000955004	0.000117416	0.000750398	0.000459117	-0.000538913	-0.000122824	-0.000544051	8.77568e-05	-0.000157965	0.000343178	-0.000613236	0.000189614	0.000250498	2.79766e-05	-0.000306687	-0.000107045	0.000276122	-9.18646e-05
MX-Pul-1-14-f-RV-#171	-0.034194	-0.0132344	-0.000139966	-0.00318614	-0.00853651	0.000941977	0.00742672	0.00206086	-0.00122269	0.0036888	-0.00208431	0.00160936	-0.00112924	-0.00231392	-0.00125796	0.00342927	0.00102129	0.000367729	0.00393181	-0.00141173	-1.22691e-05	0.000779463	0.00137334	0.00158338	0.00188416	-7.1852e-05	0.000342441	0.00149721	7.86477e-05	-0.000396644	0.00032095	-0.000904196	-0.000195955	0.000141227	0.000175665	-0.000565463	-0.000423832	0.000697103	-0.000339734	-4.97948e-05	-0.00011288	-0.000282467	0.000532963	-0.000455058	-6.86526e-05	0.000396615	-9.00768e-05	4.44729e-05	-0.000188484
MX-Pul-1-14-f-RV-#168	0.0178657	0.000383458	-0.000997116	0.000127315	-0.00525328	-0.00373869	0.00667668	0.00384429	0.000325265	0.000383556	-0.00453651	-0.00357594	0.00127274	0.00295601	0.00254386	0.0016716	-0.00149296	-0.00176574	-0.000850666	-0.000539183	0.000385626	-0.000291975	0.000105233	-5.75284e-05	-0.000224017	0.000355249	-0.00054395	0.000266509	-0.000104818	-0.00141906	-0.00052404	0.00130439	0.000257432	2.15775e-05	0.00111014	0.000231263	-0.000514902	-0.000664059	0.000404213	-0.000549245	-0.000351147	-0.000523047	0.000118115	0.000510199	-0.000250151	-0.000386815	-0.000159693	-0.000186281	0.000236649
MX-Pul-1-14-f-RV-#156	-0.00746419	0.0132381	-0.00305634	-0.0120356	0.00456285	-0.00294728	0.0111899	0.0002448	0.000832856	-0.00599527	0.000110423	0.00175598	-0.00347312	0.00118929	0.000502707	0.00501348	-0.000204783	-0.00189768	-0.00378364	-0.000201323	-0.00137002	0.00154519	-0.00176272	-0.00143951	0.00179063	-0.000881138	-0.00103212	-0.000229223	0.00039606	0.000753121	0.000708248	0.000142925	-0.000504903	0.000198402	-0.000140252	-0.000176472	-0.000368739	0.000419829	-0.000693903	-0.000292495	3.74823e-05	-0.00031287	-0.000408814	0.000262854	0.000309701	-0.000184716	-0.000378411	8.41141e-05	-0.000182987
MX-Pul-1-14-f-RV-#151	0.00453553	0.0270567	-0.0079039	-0.00242701	-0.0107416	-0.00236	0.00192371	0.000270088	0.000218049	-0.0015794	0.00170862	-0.00414348	0.000427318	0.00114652	-0.00263697	0.0012295	-0.00269633	-0.000835438	-0.00233541	0.00220826	-0.00263406	0.00060225	0.00177251	-0.000214706	-0.00070473	0.00127309	-0.00069975	0.00106521	-0.00109023	-0.000121587	0.000716487	-0.000347306	0.000216348	0.000921582	0.000313117	-0.000233697	0.000187217	-4.77193e-05	4.47601e-05	0.000268009	-0.000245094	0.000850767	0.000164062	-6.08178e-05	-5.29574e-05	0.000170531	-3.44706e-05	0.000132119	8.68439e-05
MX-Pul-1-14-f-RV-#148	-0.00398749	0.0115627	-0.00759479	0.00398514	-0.00838015	0.0110996	0.000592986	1.03136e-05	-0.00281759	-0.00172781	0.00168705	-0.004061	0.000875278	-0.0051514	0.000341789	-0.00130543	4.27474e-05	0.00396701	-0.00167692	0.00118986	0.0012898	-0.00170996	0.00164451	-0.0012475	-0.000847229	-0.000787014	0.000329336	-4.03992e-05	0.00073189	-0.000638274	0.00153568	-0.000286065	0.000201353	-0.000206506	-0.00038377	0.00127487	-0.000681896	0.000366688	0.000349537	-0.000585877	0.000258922	0.000136037	-0.000178175	-0.000102443	-1.69612e-05	-0.000298383	7.92618e-05	6.41981e-05	7.83669e-07
MX-Pul-1-14-f-RV-#147	-0.0226509	-0.00160908	-0.0123756	-9.7926e-05	-0.00827597	-0.00172736	0.00283542	0.00349146	-0.000780294	-0.00250836	-0.00353876	0.00175147	-0.00198159	-0.00121587	0.00162556	-0.00152032	0.000580481	-6.16411e-05	0.00204984	-0.00194855	-0.000554893	-0.000462652	0.000358817	0.000233339	-0.000733405	-0.00191064	-0.000326384	0.000810582	0.00129125	0.000387971	-0.000481571	-6.71086e-05	0.00110329	0.000248374	0.00036681	-0.00051393	0.000458831	8.35801e-05	-5.14223e-06	8.14477e-05	3.37154e-05	-0.000349566	-5.33669e-05	-9.50321e-05	-0.000115557	7.18637e-05	-0.000550102	9.04293e-05	0.000319058
MX-Pul-1-14-f-RV-#146	-0.00477812	0.011501	-0.0112912	0.0147968	-0.000840833	-0.00228971	-0.000209671	-0.00660228	0.0107856	0.0052277	0.00128599	-0.00476312	0.00223926	-2.75308e-05	-0.00403515	0.00616055	0.00276002	0.00347336	-4.32017e-05	-0.000265989	-0.00155429	-0.00228538	-0.00289246	-0.00202724	0.000331773	-0.000438897	0.000230403	-0.000536757	0.000910309	0.000374588	-0.000191769	2.31469e-06	-0.00025119	-0.000596266	-0.000102455	-0.000227062	-4.41799e-09	0.000110506	5.45987e-05	5.5776e-05	-0.000350812	0.000243853	0.000120627	-4.26705e-05	-0.000340572	-2.25714e-05	2.88641e-05	-0.000173185	8.50301e-05
MX-Pul-1-14-f-RV-#145	-0.00643136	0.0104742	-0.0132747	0.00427112	-0.00425393	0.0076072	-0.0020184	0.00255304	-0.0011228	-0.00422487	-0.000216347	-0.00206948	-0.00414337	-0.0040942	-0.000861684	0.000384271	0.00153828	-0.00181629	0.000161661	0.000376718	-0.000719162	0.00154279	0.00170725	-0.00120182	0.001964	-0.000287465	0.000946133	0.00025519	1.0907e-05	0.000585173	-0.000940572	0.000783522	-1.80802e-05	-0.00102001	0.000450083	-0.000230116	0.000448398	0.000149914	0.0002277	0.000182133	0.000474077	0.000266701	-0.000102679	0.000291606	0.000213107	4.9627e-05	-5.42607e-05	0.000354609	0.000322335
MX-Pul-1-14-f-RV-#141	-0.0104294	0.0173573	-0.00300719	-0.00193198	-0.00379097	-9.12986e-05	-0.000141974	0.00432128	0.00145974	1.27348e-05	0.00421948	0.00447538	-0.00199928	-0.00228108	0.00161094	-0.000178364	-0.000963242	-0.00208218	-0.000258716	0.000390413	0.000382483	-0.00207539	-0.00022559	0.000120174	0.000354945	0.000637197	-2.82569e-05	-0.000184637	0.000222081	0.000130613	-0.000411387	-8.12303e-05	-0.000987728	0.000171812	-0.000920463	-0.000124193	0.000416623	-0.000745933	-3.90473e-05	0.000227546	0.000174831	-0.000619903	-0.000179728	-6.38414e-05	-0.00028163	2.04152e-05	-0.000176502	0.000230263	0.000198677
MX-Pul-1-14-f-RV-#138	-0.0299548	-0.00915306	0.000306356	-0.0184241	-0.00936688	-0.00300314	-0.003119	0.00411939	-0.000264337	-0.00052795	0.00310986	0.00446728	-0.000540127	-0.000168017	0.00013419	0.00285159	0.00106366	0.000632442	-0.0014272	-0.00135329	-0.0020353	-0.000913431	0.000373708	-0.00141353	-0.000358326	-0.00107007	0.000117363	-0.000634321	-0.00111222	-0.000514941	-0.000975213	0.000141088	-0.000817577	-7.17588e-05	-0.000218795	0.000265025	-0.000384547	-0.000301917	0.000232803	-1.06644e-05	-0.000341856	0.000173166	-1.69415e-05	-0.00027588	0.000105497	0.00039935	0.000574045	-0.000198893	-1.17267e-05
MX-Pul-1-14-f-RV-#136	-0.0171853	0.00694097	-0.0254858	0.00173068	-0.00906524	0.000763908	9.02106e-05	0.000385969	-0.00105437	-0.00563814	0.000593759	-0.000800894	-0.00290567	0.000410795	-0.00176961	-0.000630485	0.000429606	0.000747644	0.00251176	-5.92532e-05	-0.000133325	-0.000394146	9.7615e-05	0.000302207	-0.000501053	0.00115363	0.000852333	-0.000752918	0.000306644	-3.29729e-05	-0.000187944	-8.94131e-05	-0.000106292	0.000479219	0.000517299	0.000566194	-0.000261957	-8.28488e-05	0.000158708	0.00010021	-0.000459905	-9.99984e-05	-0.000137256	4.55801e-05	0.00019576	0.000393263	9.78484e-05	-0.000264085	0.000169077
MX-Pul-1-14-f-RV-#135	-0.0116148	0.0102284	-0.00631186	0.000751442	-0.00587354	0.00687679	0.00261425	0.00327608	-0.00155007	-0.000670096	0.000279762	0.000985323	-0.00339945	-0.000670182	-0.000323845	-0.000105914	7.62528e-05	0.00127882	0.00176754	9.94771e-05	-0.000313531	-0.000553518	0.00023134	-0.00149838	-0.000153254	-3.91823e-05	0.000709948	7.34726e-05	-0.00116582	-0.000580123	0.000210331	0.000125592	0.000448721	-0.000182102	-7.20529e-05	-0.000566347	0.00030388	-0.000417531	-0.000487327	-2.89628e-05	-0.000128744	-6.03083e-05	0.000210238	-2.11916e-05	-0.000128853	-0.000148415	0.00021995	0.000173353	-0.000532905
MX-Pul-1-14-f-RV-#130	-0.00361086	0.0150296	-0.00906798	-0.00253383	0.00158567	0.00664488	0.00308646	-0.000962603	-0.00448645	-0.000647957	-0.000986943	0.00193314	-0.000520633	2.53121e-05	5.71223e-05	0.00157664	-0.00135367	0.00238862	0.00108885	0.000353634	-0.000649214	0.000339463	0.00124971	-0.000398969	-0.000327394	0.000713167	-0.000345413	-0.000473326	-0.000456371	0.000469941	-0.000558724	-0.000478388	0.00017112	-0.00019738	-0.000494309	-0.000121743	-0.000244776	-0.000469015	-0.000519177	-0.000426597	0.000278594	0.000169411	-0.000466997	-0.000548554	-0.000120132	-0.000650956	-0.000314113	3.19617e-05	0.000313725
MX-LG-1-14-f-RV-#259	0.0239839	0.00803809	-0.00353348	0.00336453	-0.0114997	-0.0107683	-0.00148258	-0.00179792	0.000628295	-0.00124095	0.00673169	-0.00148929	0.00329379	0.00159451	0.00199125	-0.000897191	0.00431587	0.00114582	-0.0018446	-0.00180456	-0.000493076	0.00136281	0.000655555	0.00236576	0.000175379	-7.99923e-05	0.000467632	-0.000921564	7.3115e-05	-2.03152e-06	-0.000810013	0.000213521	9.63182e-05	-0.000353082	0.000200013	0.000839356	0.000504613	1.70337e-05	-0.000790332	-0.000834934	-1.99372e-05	-3.27601e-05	0.000296247	1.59069e-06	0.000207663	-5.77482e-05	-0.000242002	0.00016686	-0.000229007
MX-LG-1-14-f-RV-#262a	0.0207792	0.00845805	0.0073108	0.00843953	-0.00581765	-0.00472549	-0.00350811	0.00015676	-0.000533452	0.00483947	0.00247488	0.00239636	-0.00336622	-0.00447233	0.00108395	-0.00152032	-0.00148101	0.000918467	-0.00234532	-0.00196437	0.00207829	-0.000565322	-0.00114453	-0.00132601	0.00078161	0.000750111	-0.000871348	0.000344055	-0.000666724	0.000362421	0.00014572	0.000241169	0.000707791	0.000183776	0.000609355	0.000168471	0.000270681	0.000285187	0.000818624	-3.77874e-05	8.69632e-05	-5.31834e-05	-6.49389e-05	-0.000524833	0.000396643	0.0003835	-0.000261771	2.91525e-05	-3.23195e-05
MX-LG-1-14-f-RV-#262	0.0176616	-0.00530617	0.000693454	0.00831191	0.00580869	0.0055064	-0.0081567	-0.00521004	0.00131147	-0.000148538	-0.00139277	0.000907109	-0.00214793	0.00472065	0.00159916	-0.00135981	-0.000828231	0.000810112	-0.00162468	-0.000627138	-0.00120649	-0.000591048	0.00038398	-0.000573744	0.00132718	0.000706291	-0.000551278	-0.000265738	9.67131e-05	4.60116e-05	0.000124896	-0.00114175	0.000354031	0.000474843	0.000225887	0.000255481	0.000730052	2.02364e-05	0.000377086	-0.000177118	-2.38065e-05	-0.000387745	-8.79821e-05	0.000120367	0.000103291	0.000202085	-9.48672e-05	-4.44813e-05	0.000132034
MX-LG-1-14-f-RV-#261	0.0128019	0.0106213	0.00165913	0.00296134	0.00247441	-0.000752686	0.00481149	0.00628023	0.00421118	0.000784849	0.000415433	-0.00216831	-0.00107817	0.00393589	-0.00250944	0.000380252	0.00237	-0.000357077	4.47323e-05	-0.00330664	0.00215496	0.00180988	0.000519779	-0.00136687	-0.000710323	-0.000782392	0.000165965	0.000229524	0.000407518	0.000371626	-0.000715049	-0.000972169	-2.02645e-05	0.000418298	-1.17381e-06	0.000717102	3.41691e-05	7.0604e-05	0.000628533	0.000258769	-0.000186403	0.000474601	0.000242802	4.69349e-05	0.000115624	1.28002e-05	-0.000189651	-0.000335608	-0.000229496
MX-LG-1-14-f-RV-#260	0.0051061	-0.0112592	0.00205473	0.0074467	-0.0175383	-0.00501042	-0.00225357	0.000552236	-6.92607e-05	-0.000751711	0.00371697	0.00697389	-0.00153867	-0.00116193	0.00204109	6.36647e-05	0.00100663	0.0032152	-0.00222815	0.0004761	0.00118163	0.000835262	-0.000298616	0.000636915	0.0016944	0.000574382	-0.000487379	0.000815859	-0.000649875	3.88621e-05	0.000105221	-0.00038783	-0.000877711	-0.000433586	-0.000311063	0.00065786	0.000203157	-0.00062084	2.18624e-05	0.00100042	0.000129288	6.6962e-05	0.000136916	0.000201735	-8.89231e-05	-0.000175593	0.00016679	-0.000128097	-5.47586e-05
MX-CT-1-14-f-RV-#274	0.0140242	-0.00784268	0.00293956	0.00414039	-0.00471127	0.0112405	-0.00537239	0.00221433	0.00460951	0.00664302	-0.00398276	-0.000448673	0.00283768	-0.000485246	0.00550822	0.00186814	-0.00187101	-0.00058505	-1.18805e-05	-0.000743724	-0.00228014	-0.000970031	0.000652316	-0.000149429	0.00100659	-0.000437024	-0.00036899	0.000630917	0.000103766	0.000148042	7.75297e-05	0.000746176	0.000339661	0.000126127	-0.001002	0.000277837	0.000653124	5.97551e-05	6.6797e-05	-0.000159466	-0.000537528	1.92167e-05	8.28251e-05	0.00034482	0.000275761	-0.000130281	-0.000239225	1.02265e-05	-0.000402979
MX-CG-1-14-f-RV-#223	0.0205931	-0.00652781	-0.00565357	-0.00157601	0.00836793	0.000254816	0.000730764	-0.00306168	-0.00323442	0.00129397	-0.00328612	-0.0028901	-0.000119672	-0.00544717	0.000468779	-0.00538645	-6.71545e-05	-0.00187173	-0.00357412	0.000255281	0.000119144	-0.000166693	0.000657284	-0.00169265	0.000598909	-0.000479313	0.000659078	3.88532e-05	0.000408682	0.000273614	-0.000807134	-0.000819299	-0.000682449	-8.14529e-05	-4.92222e-05	-0.000179859	-0.000746228	5.28521e-05	-3.01387e-05	0.000402094	4.34776e-05	4.11919e-05	0.000117816	0.000295991	-2.96067e-05	0.000164434	-0.000120712	-0.000133158	-0.000165867
MX-CA-1_#32_f_RV	0.0275903	-0.00668851	0.000792884	-0.00338076	-0.00415472	0.00624212	-0.00561537	-0.000831087	0.0033153	-0.000325994	0.000325183	-0.00208342	0.00197644	0.0018679	-0.000775572	0.00117238	-0.00226569	0.000667018	-0.00101663	0.00155692	0.000273998	3.26059e-05	-0.000263186	1.07318e-05	0.00149413	-0.000937016	0.000934373	8.65224e-05	-0.000581744	-0.000802438	-0.000724461	0.000318208	-0.00031717	0.0011763	0.000760045	-0.000158002	0.000138536	0.000484084	0.000182372	-0.000308247	0.000415398	-0.000156368	0.000399832	-0.000143153	-0.000321083	0.000282161	0.000463868	0.000288377	0.000319627
MX-CA-1-14-f-RV-#247	0.0212772	0.00119148	-0.00975983	0.00202031	-0.0115244	-0.000109846	-0.00655768	-0.00367831	0.00120304	-0.00127831	-0.00227435	0.00220284	0.0017026	0.00163129	6.40314e-05	-0.000268956	-0.00268415	-0.000271168	0.00314198	-0.000310287	0.000359872	2.09397e-05	-0.000643608	0.000576978	-0.000463817	-0.00102727	0.000536984	-0.00012298	0.000889421	4.24943e-05	0.000621029	-0.000365449	-0.000525802	-0.00105876	4.22867e-05	-0.000314312	-0.000194217	4.09376e-06	0.000234804	-0.000150959	0.00029035	0.000481442	-0.000161975	5.50791e-05	0.000724321	-2.04909e-05	0.000412833	-0.000135764	-0.000282149
MX-CA-1-14-f-RV-#237	0.0277277	0.00166173	0.0254225	-0.000948355	0.00256582	0.00142925	-0.00154823	-0.00640425	0.000202785	0.00385784	0.000955115	0.000679643	-0.00239009	0.00240756	0.00293722	0.0022435	0.000464813	-0.00140327	0.000747874	-0.00235797	-0.00116906	-0.0012151	9.83121e-05	-0.000745178	8.8595e-05	0.000849928	-0.000633705	0.000302065	0.000546143	0.00021642	0.000399493	0.000845381	-0.000268631	0.000251918	0.00026495	0.000271829	-0.00130353	6.02008e-05	-0.000956425	3.90827e-05	0.000362611	0.00026629	-2.55396e-05	-0.000154504	7.29718e-05	0.000138553	0.000400074	0.000182211	0.000319991
MX-CA-1-14-f-RV-#233	0.015868	-0.00243896	-0.00170819	-0.00230634	-0.010903	-0.00595042	-0.00563862	0.00146462	-0.0031904	0.000375653	0.000827658	0.00172148	0.0010436	0.00268124	-0.0015851	0.00118784	-0.00136956	0.000658229	0.0015783	-0.000394675	0.000142347	0.000744752	-0.000241954	-0.00102402	-0.00096578	0.000815137	0.000576694	0.000332133	-0.00101502	-0.000209125	0.000753768	0.000244718	0.00111655	-0.000255347	0.000186301	0.000213583	-4.01171e-05	-0.000445521	-0.000609101	0.000298942	0.000636541	-4.11944e-05	0.00022215	-0.00011154	2.04242e-06	7.44741e-05	-0.000238624	-0.000444756	-8.20502e-05
MX-CA-1-14-f-RV-#232	0.0187137	-0.0127683	0.0050541	-0.00414991	0.00618462	0.007497	-0.00195346	0.0141818	0.00728249	0.000851653	0.00261824	-8.64363e-05	-0.00273596	-0.00221619	7.5384e-05	0.00109673	-0.00221426	0.000416838	0.00148829	-0.000367926	-0.00131169	-0.000391611	0.000431823	0.000308813	-0.000455875	-0.000304207	-0.00109589	5.6104e-05	-9.4429e-05	-0.000635541	4.97802e-05	-0.000244224	0.000154644	7.11951e-05	-0.000484245	0.000203694	0.000137075	3.84474e-05	-0.000335093	-0.000188185	0.000420342	0.000162185	-0.000445878	0.000250388	0.000110817	0.000262017	-6.35426e-05	-0.000455976	-4.63978e-05
MX-CA-1-14-f-RV-#230	0.0294489	-0.0129818	0.00396879	-0.00122366	0.00428798	-0.00342335	0.00483668	0.0050063	-0.00398981	0.00334666	0.00340685	0.000397084	0.00148593	-0.00589295	0.000790515	0.00319241	-0.00648588	0.000310967	-0.00230001	0.000870063	-0.00155659	0.00155117	-0.00012165	0.000725269	-0.000681208	6.07213e-06	0.000899592	0.000188426	0.001104	0.000343161	-0.000874991	-0.000727161	2.34555e-05	-0.000608246	0.000472543	0.000370333	0.000226503	0.000156702	-0.00020383	-0.000330219	-0.000236032	2.89027e-05	0.000310618	-0.000648779	7.23207e-05	2.40123e-05	4.77975e-05	-9.84177e-05	7.1299e-05
MX-CA-1-14-f-RV-#228	0.0301957	-0.00772156	0.00173148	-0.00971869	0.00725582	0.00474389	0.0014228	-0.00148365	0.00210068	-0.00139936	-0.000387216	-0.00216124	0.00128561	0.000409573	0.000569264	-0.000722509	-0.000665285	0.00307866	0.00148356	-5.36739e-05	0.000980233	-0.00118808	0.00140751	0.000938097	0.000452758	0.000477182	0.00090555	0.000622724	0.000357028	0.000960784	0.0004423	0.000842195	-0.00111879	0.000365834	0.000479258	9.12621e-05	-0.000467809	-0.000118661	4.0042e-05	0.000201349	0.00022093	-0.000114812	-0.000244696	-0.000139582	-0.000621945	0.000143952	-0.000474145	8.84951e-05	-0.000500626
MX-CA-1-14-f-RV-#227	0.019941	-0.0184996	-0.0058344	0.000571167	-0.00141888	0.00139917	-0.00530436	-0.000670837	-0.0012949	-0.00235345	-0.00341825	-0.000543934	0.000338095	0.00175165	-0.000961091	-0.0012437	-0.00191966	-0.00116393	-0.000701032	-0.00162847	-0.00166907	0.000931569	0.000298131	0.000214684	-0.0010012	-0.000643071	-0.000216659	0.000691523	0.000163672	0.000447234	0.000235264	-1.44558e-05	-0.000367463	-0.000355212	0.000378313	-9.10269e-05	-0.000579523	-0.000271236	-2.30241e-05	0.000469545	-5.46687e-05	-0.000166152	-0.000410318	0.000248371	0.000265544	-0.000128283	8.07012e-05	-7.39667e-05	-6.78417e-05
MX-BC-1_#12_f_RV	0.0261205	-0.00242278	-0.00988888	-0.0134149	-0.0020226	-0.0039882	0.00428615	0.000822533	-0.00766239	-0.00216636	-0.00511155	-0.00161622	0.00109072	0.000897433	0.00349324	0.00123661	-0.000558117	-0.000658325	0.000729996	-0.00111143	0.000158258	0.000449505	-0.00173925	-0.000439995	-0.00112716	0.000385177	-3.07245e-06	-0.00106141	-0.000238927	-0.000419858	0.000400146	-0.000290469	-0.000963817	-0.000831641	-0.000160772	-0.000397192	0.000946492	0.000413506	0.000294093	-0.000135815	0.00054332	2.37547e-06	0.000741658	0.000299916	-0.000127434	-0.000206309	0.000290742	0.000293135	0.000140957
MX-BC-1a-14-f-RV-#191	0.0339137	0.00490109	0.0138112	-0.00449171	-0.00155578	-0.00181524	-0.0020248	0.00578611	0.00345326	-0.00571192	0.00387597	0.00522584	0.00224374	-0.00205593	0.000474564	-0.000319756	0.000578891	-0.00190843	0.00351214	0.000636497	-0.000504071	-0.0003591	-0.00136054	-0.000187254	0.000253767	-0.000346597	4.79709e-05	0.000174807	0.000459046	-0.000331489	6.21612e-05	-0.000464488	0.000154985	-7.15482e-06	-5.06136e-05	0.000281602	-0.00031768	0.000184501	0.00085917	0.00022375	-0.000135364	0.000231651	0.0001238	0.000116454	-0.000426023	-0.000476542	-0.000152993	0.0001045	0.000499388
MX-BC-1a-14-f-RV-#185	0.0306266	0.00612975	0.00205541	-0.01339	-0.0042494	-0.00468637	0.00212749	0.00159967	0.00767191	-0.0026818	0.000811744	0.00180638	-0.00346842	-0.000633924	-0.000822128	-0.00276967	-0.000345459	0.000484464	3.34475e-05	0.000561491	0.00112451	-0.000204622	-0.00188572	0.000184992	-0.000679821	0.000714088	3.36874e-05	-8.36842e-06	-0.00039464	0.000610339	0.000677398	1.93358e-05	0.000115253	-0.00039582	-2.83354e-05	-0.000903023	-0.000395653	0.000389352	-1.53843e-05	6.2526e-05	-0.000170152	0.000136412	0.0004571	0.00018482	0.000139393	0.000183471	-0.000411134	-0.000276461	-9.11413e-05
MX-BC-1a-14-f-RV-#176	0.0274669	-0.00469996	0.00409317	-0.0090408	-0.00550011	0.0043125	-0.00333162	-0.00642211	-0.00248426	-0.00537453	0.000110567	0.00121913	0.00226646	-1.0439e-05	0.000212929	0.00210204	0.00179793	-0.00250719	-7.84424e-05	0.000363352	0.00110006	-6.98187e-05	-0.000209268	0.00129331	0.000509266	0.000879272	0.00124099	-8.4955e-05	0.000529505	0.00102074	7.66911e-05	-0.000215561	-3.36795e-05	0.000127349	-0.000363607	-0.000510914	8.03527e-05	-0.000236318	0.00038338	-0.000622868	-0.000483278	0.000309933	-0.000467581	-0.000164545	-0.000481719	0.000173821	-7.41305e-05	-0.00061398	9.86426e-05
MX-BC-1a-14-f-RV-#173	0.01682	-0.00578042	0.00542344	-0.0173782	-0.00399426	-0.000132338	-0.00644114	-0.0060367	0.00227333	0.00046401	0.000984891	0.000230995	0.00514068	-0.00350658	-0.000847618	-0.000656812	0.00454536	-0.00125459	-0.000267351	-0.000617447	-0.000447791	0.000781367	0.000576468	4.45655e-05	-0.00118459	-0.000846276	-0.000422594	-0.000391767	-0.000765468	-6.0586e-05	0.000122818	0.000126041	0.000995604	1.19593e-05	-0.000324439	8.24976e-05	-0.000259518	0.000613871	-0.000171679	0.000474783	0.00022469	-0.000455722	-0.000208652	-0.000203806	4.15962e-06	-4.47336e-05	8.3473e-05	-7.73042e-05	0.000243283
MX-BC-1a-14-f-RV-#172	0.0244252	0.00789006	0.00185013	-0.00492445	0.00325358	0.00497036	-0.00107796	-0.005233	0.000355576	0.00167882	-0.000618862	0.00243718	0.000441445	-0.00206061	-0.00036481	0.00101768	0.00147511	0.00147984	0.00261006	-0.000768666	-8.07281e-05	0.00249549	0.00144038	-0.000375178	0.000366859	-0.000303774	-0.000130047	-0.000666881	-0.000401352	-0.000574351	-0.000175604	-0.000480421	-0.000208389	0.000123607	-1.72166e-05	-0.000136233	0.000325149	5.27639e-05	0.000535155	-0.000270734	3.25443e-05	-0.000157456	-0.000498171	0.00031598	-0.0001453	6.24869e-06	0.000136433	0.0001651	-0.000125084
FL-PR-15b-14-f-RV-#118	-0.0142579	0.00465788	-0.00249303	-0.00110865	-0.00595009	0.00852702	-0.00330882	-0.00722292	-0.00359427	-0.00319129	-4.44501e-08	0.00258418	-0.00154981	0.00270169	0.000819814	-0.00300484	-0.000501395	-1.30923e-05	-0.00116093	-0.000649877	-0.000844555	-0.00061472	-0.000258674	-5.81148e-05	0.000395447	-0.00128166	0.000401372	-0.000289214	0.00122202	-0.000918937	4.99821e-05	-2.00678e-05	0.000301809	0.000801027	-8.05584e-05	-0.000282773	-0.000452493	-0.00056631	-0.000207329	0.000149191	0.00018834	5.57549e-05	0.000749989	-0.000103186	0.000233084	-9.53436e-05	3.22938e-05	-0.000309391	-0.000360596
FL-PG-3-13-f-RV-#14-#281	-0.00460058	0.0151884	-0.00523819	0.00499178	-0.00374243	-0.00393114	0.00409122	-0.00790432	-0.00333905	0.00260612	-0.00420633	0.000126487	-0.00172217	0.00111534	-0.000711772	-0.00361913	0.000562129	-0.0017026	0.00148404	-0.000460165	-0.00231838	-5.93086e-05	-5.60829e-05	-0.0001123	0.000143983	0.00181277	-0.000369665	0.000493389	0.000493736	0.000512533	-5.75864e-05	0.000122326	-0.000520665	-0.000188124	-3.5165e-05	0.000866281	7.29537e-05	0.000480967	0.000186062	0.000154903	-0.000162549	-0.000282708	-0.000136776	-1.21397e-05	0.000494936	5.65215e-05	8.21112e-05	-0.000110794	0.000334326
FL-PG-3-13-f-RV-#13-#280	-0.0382461	-0.0053861	0.00714581	-0.009361	-0.00844589	-0.00342938	0.0053508	-0.00458622	0.00471524	0.00872472	0.00200414	0.00386673	-0.00470654	0.00362921	-0.00156608	-0.00380981	-0.00304915	0.000811145	-0.00138107	-0.000462471	0.000250078	0.00179976	-0.000793927	1.39675e-05	-0.000651759	-7.50447e-06	0.00182313	-0.000213245	-0.000214352	-0.000809213	0.00014783	0.000904654	-8.71682e-05	-0.000198306	0.000176101	0.000152884	0.000281648	0.00112368	-1.54202e-05	-0.000113489	-3.22057e-05	0.000433208	-0.000778801	1.49365e-05	-0.000438283	-0.00047655	-0.000159605	9.84417e-05	3.30497e-05
FL-PG-3-13-f-RV-#12-#279	-0.0136457	-0.00615543	0.00249442	0.000705486	-0.000203399	0.00907257	-0.00536471	0.00542673	-0.000883765	0.0026736	-0.000633761	0.000293692	-0.000315078	-3.7688e-05	0.000875047	0.000448764	0.00123506	0.00101507	-0.00164228	-0.00179986	0.00480021	0.000697339	-6.51575e-05	3.8051e-05	-0.000789802	0.00201934	-0.000154599	-2.35441e-05	0.00170892	-0.00013141	-0.00037851	-0.000207755	6.98123e-05	0.000652864	-0.00043701	-0.000547537	0.000113053	0.000565019	-0.000483234	0.000148096	-0.000417975	3.24981e-05	0.000110005	0.000218902	0.000185377	-0.000250906	0.000465225	0.000108957	0.000168053
FL-LX-6-14-f-RV-#39	-0.0164643	0.00568716	0.00141761	-0.00695861	0.00561656	0.000118075	0.00418476	0.00019697	-0.00233839	0.00111031	-0.00106482	0.00121027	0.0046073	0.00187819	0.000323084	0.00107811	-0.000631739	0.00158967	0.000328342	0.000449942	0.000694072	0.000481758	0.000656257	-0.000683322	-0.000141691	-1.23576e-05	-0.000251816	-0.000419976	0.000139658	-0.000119473	-0.000787891	-7.44393e-05	0.000172327	2.39027e-05	0.000382113	-0.000383815	-0.0010741	6.33423e-05	0.000278542	0.000268055	-2.4868e-05	0.000360126	0.000158377	0.000103506	0.000577176	0.000106299	-0.000177204	0.000386397	0.000195888
FL-LX-4-14-f-RV-#31	-0.00191235	0.00597307	0.00866984	0.00657724	0.00702334	0.00253154	-0.00117649	5.28858e-05	0.00218567	-0.0028423	0.00196717	-0.00088613	0.00168986	0.00214348	-0.000241832	0.000767245	-0.0008464	0.00074468	0.000595809	0.00116663	0.000203666	0.00111974	-0.00108853	-9.7962e-05	0.000973291	-0.000679432	0.000837804	0.000236287	0.000591187	-0.000289901	0.000102655	-0.000358391	0.000607076	-8.29683e-05	0.000322565	-0.000273704	0.00023787	-7.09989e-05	-0.000628869	0.000336726	-1.82997e-05	-8.49341e-05	-0.000449541	0.000301482	3.2724e-05	0.000170357	0.000104672	-5.81713e-05	-4.98976e-05
FL-LX-3_#38_f_RV	-0.00302518	-0.0114852	0.000307298	0.00349676	0.0152911	0.00153465	-0.00205118	-0.00371786	-0.00433771	0.000129238	0.00230113	-0.000929211	-0.00282809	-0.00408328	0.000603329	-0.00128225	0.00041847	0.000798366	0.000801026	0.000963895	-0.0010851	0.000498337	-0.00226789	-0.000986293	-0.000270238	0.000635598	-0.000554797	-0.000951773	0.000466548	-0.00114528	4.7586e-05	-0.000106926	0.000260276	0.000197656	-0.000132714	-0.000426743	-0.000297427	-0.000471736	0.000331575	-0.00025811	-0.000369205	1.61019e-05	-4.34521e-05	-0.000403732	-4.83877e-05	1.08813e-05	-1.88211e-05	0.00018051	-0.000198893
FL-LX-3_#38_f_RV	0.00259151	-0.0120199	0.00560528	0.00256175	0.0167728	0.00498788	-0.0022434	-0.00236663	-0.00351105	0.000317485	0.00394909	-0.00362916	-0.00325339	-0.00278086	-0.000125094	-0.000380634	0.00235675	0.00164181	0.00109539	0.000663499	-0.000616999	0.00159922	-0.00127441	0.000389402	0.000350698	0.00109785	0.000458464	-0.000258191	-0.00104013	-0.000502065	1.87166e-05	0.00084325	-1.7457e-05	-0.000233743	0.000476812	-0.000523258	-1.64982e-05	-0.0003824	0.000118443	0.000275993	4.00038e-05	-2.16797e-05	4.85343e-05	0.000200085	0.000232604	-4.17122e-07	-0.000103594	-0.000104245	-7.25235e-06
FL-LX-3-14-f-RV-#23	-0.00356774	-0.00320839	0.0110657	0.00240393	0.00727441	-0.000177279	-0.00177738	0.00173233	-0.00204303	-0.00311631	0.00113088	-0.0017891	-0.000157656	0.000599597	-0.000405098	0.00136817	-0.000707001	0.00136052	-0.000445457	0.00194001	0.000692096	0.000176636	-0.000159665	0.00015878	0.000118507	-4.09942e-05	0.000631012	0.000495793	-7.82538e-06	0.000310457	0.000242128	-0.000545453	-0.000216874	0.000347281	0.00072408	0.000247101	0.000394398	-0.000331281	-0.000209205	0.000247977	2.8771e-05	-9.74165e-05	-5.63295e-05	1.25795e-05	0.000460207	-0.000718444	4.65737e-05	-0.000369882	5.29605e-05
FL-LX-1-14-f-RV-#7	-0.0235614	0.00657201	0.00485218	-0.003775	0.000980226	0.0106921	0.00105727	0.000276348	0.000671538	-0.00156888	0.00211467	-0.00132025	0.00388891	0.000918481	-0.00178798	-0.00347997	-0.00050623	0.00076817	-0.00126828	0.000377723	-0.000367927	-0.00129137	-0.00161254	0.00093373	-0.000849044	-0.000267531	0.000100745	0.00123435	0.000371899	7.37556e-05	-0.000422713	0.000285057	-0.0005435	-0.000347006	-8.25992e-06	-0.00021547	0.000125911	5.55032e-05	-9.00249e-05	0.000108954	0.000166685	0.000198943	0.000618404	-0.000265346	8.31672e-06	-0.000163005	-0.00057116	8.8315e-05	3.6139e-05
FL-LX-1-14-f-RV-#15	-0.0048146	-0.00965603	0.0195811	0.00803581	0.00173407	0.0023055	0.00314719	-0.00492253	-0.00493047	-0.00194013	-0.000254108	-0.00468535	0.00154394	0.00473497	0.00174702	0.000785164	-0.000169306	0.000439052	0.000447361	4.51042e-05	0.000213208	0.00285139	-0.000566091	-0.00169	-0.000624335	-0.000677874	-0.000133363	0.000590313	-0.000594329	0.00084397	-0.000399915	-0.000459872	4.92129e-05	0.000413472	-0.00117281	-4.6413e-05	0.000487014	-9.84746e-05	7.44448e-06	0.000223379	2.02519e-05	7.76679e-05	0.000126398	-0.000627957	-5.90481e-05	-3.21328e-05	-5.36548e-05	0.000107385	0.000142691
FL-LX-1-14-f-RV-#12	-0.0284414	0.0119008	-0.0067825	-0.00284298	-0.00151285	0.00939016	0.010189	-0.00980227	0.0136172	0.000643914	-0.0039779	0.00195528	0.0034389	-0.00467127	0.00262803	0.00274691	2.9818e-05	-0.00433552	-0.000958812	0.00117367	0.0022091	0.00277987	0.00036782	0.00023118	-0.000430779	0.00127692	-0.000465347	0.000373832	0.000343063	-0.000560469	0.000319811	0.000283109	0.000347037	-0.000266569	2.58934e-05	0.000284159	5.88241e-06	-0.00076134	9.68e-05	2.37458e-05	0.00029551	-1.53924e-07	0.000316063	-0.000206195	-2.66089e-05	7.28449e-05	0.000166355	-0.000112613	-0.000176889
FL-LX-1-14-f-RV-#11	-3.77778e-05	-0.00547313	0.00650612	0.00655026	0.0121608	-0.00302864	0.00375685	-0.00670091	-0.000718398	-0.00247824	-0.00375358	0.00531863	0.00106634	-0.000165161	0.0012465	0.0014694	-0.000527408	0.00361706	0.00228188	0.00235132	0.000449624	0.000480194	-2.55231e-05	0.000142717	-0.00019149	-0.00019501	-0.000524143	0.000151607	-0.000522313	-0.00067718	0.000281264	-0.000646069	3.84553e-05	-0.000290486	-0.000113072	0.000650033	-0.000373566	0.000518579	9.3014e-05	-0.000193926	-0.000478227	-0.000420605	0.000120384	0.000266468	0.000159342	0.00034797	-0.000460331	0.000147545	0.000146978
FL-EG-3a-14-f-RV-#42	-0.00359468	0.0197966	0.00360582	-0.00624669	0.00438115	-0.000393681	0.00924849	-0.00274732	-0.00113718	-0.000469372	0.0015942	-0.00244136	0.000493794	-0.00208214	0.00643509	-0.00186287	-0.000600097	0.00265889	-0.000241499	-0.00123563	-0.000702413	0.000390453	0.000614831	0.000491278	-0.000658973	-0.00104456	-0.000371454	-0.00115295	0.000443812	-0.000620336	0.000283574	-6.34587e-05	8.26321e-05	0.00028561	0.00039351	-0.000122312	0.000636612	-6.04587e-05	-0.000408965	0.00109247	-0.000349044	0.000339928	-0.000220652	0.000375	-0.000572034	0.000450589	0.000105155	-0.000294052	0.000241445
FL-EG-3a-14-f-RV-#43	0.000895532	0.00758365	-0.00223303	-0.000635631	-0.00841837	-0.00405616	0.00668995	0.0057097	-0.00271813	-0.0010608	-0.000298592	-0.000613007	0.00526173	0.000285579	0.00529964	-0.000831763	0.00123305	0.00147304	-0.000290537	-0.000355543	-8.32653e-05	-0.00107577	-0.000207808	-0.00112944	-0.00011678	0.000701424	0.00111211	3.18043e-05	-1.44095e-05	0.00025044	0.000257337	0.000450119	-0.000140624	0.000248469	0.000498836	-0.000780689	0.000152161	0.000231053	0.000192736	8.23421e-05	-0.000457423	-0.000855001	-0.000684799	-0.000661135	0.000320902	-0.000190976	0.000268676	-7.02823e-05	-0.000362441
FL-CL-14-5-f-RV-#111	-0.0268176	-0.000372619	-0.0100071	-0.0213272	0.00960264	-0.017395	-0.0176273	0.00935948	-0.00445814	0.00496007	-0.00652018	1.343e-05	0.00439419	0.000429919	-0.00149487	0.000555265	0.00242525	0.00202876	-0.00155398	0.00179216	-0.000820866	0.00117055	-0.000165025	-0.00124472	0.000364362	0.00108549	-0.000696147	0.000602606	0.00153243	2.97548e-05	0.000328449	0.000311622	0.000274717	-5.41961e-05	-2.86415e-05	0.000221756	0.000215896	-0.00012925	4.62952e-05	-3.81294e-05	0.000429451	0.000110308	-9.90708e-05	8.18326e-05	-0.000396578	0.000303828	-0.000117743	-6.45603e-05	-0.000171328
FL-BiC-1-13-f-RV-#30-#288	-0.0301231	-0.0102185	0.0082229	-0.0245556	-0.0100671	-0.00347298	-0.00835236	-0.0121562	-0.00200171	-0.00123951	-0.000779989	-0.00882014	-0.00566379	-0.00330519	0.00108664	0.00340143	-0.00102094	-0.000662517	0.000785199	-0.000517243	0.000726008	-0.00282481	-0.000724729	0.00175711	-0.000250102	-3.9394e-05	-0.00104532	0.000507387	-0.000445843	0.000285693	-0.000549487	-0.000487602	0.000320585	0.000163074	0.000165154	0.000184154	0.000518397	0.000129836	0.00028661	4.07983e-05	8.16997e-05	0.000167554	-0.000122019	1.61173e-05	0.000161024	-0.000211521	-5.49683e-05	-5.73235e-06	-7.35756e-05
BR-ITA-4-15-f-RV-#281a	0.00525767	0.01038	0.0129545	0.0109743	-0.00402086	-0.0113804	0.000573288	0.00396045	-0.00117402	-0.00182035	-0.000341571	-0.00352565	0.00176222	-1.8154e-05	-0.00161565	0.00145042	8.8554e-05	-0.00326163	0.0018255	0.000590358	0.00197178	-0.000911088	-5.86799e-05	-0.00148208	0.000553472	-0.000271755	0.00037023	0.000881154	-0.000871333	-0.00122032	-0.000325681	0.000413437	-0.000357852	2.79865e-05	-0.000215854	1.31728e-05	0.00013019	0.000418795	0.000228358	0.000179154	-7.39898e-05	-6.64206e-05	-0.000109676	-0.00010866	0.000151228	0.000101199	-0.000127701	-4.28902e-05	-0.000297694
BR-ITA-4-15-f-RV-#1-#287a	-0.00525909	-0.00632154	0.00482083	0.0113754	-0.00464197	-0.00812202	-0.000843311	-0.00106847	0.000981483	-0.00071871	-0.000300247	-0.00168021	0.000373147	0.00345777	-0.000821012	-0.000716166	-0.00194992	-0.00193075	-0.000108744	0.000622341	-0.000880109	-0.000973986	0.000228429	0.00103886	0.000825076	0.000521421	-0.000254259	8.69679e-05	0.00176532	-0.0014902	0.000315132	-0.0005687	0.00028248	-0.000856831	-0.000196756	-0.000132308	0.000333761	-0.000223109	-7.74913e-05	0.000479057	-0.000200459	5.16713e-05	-0.000267158	-0.000192431	-0.000249472	9.2242e-05	6.80685e-05	0.000282049	3.43632e-05
BR-ITA-4-15-f-RV-#2-#289	-0.0303523	-0.0273287	0.00899374	0.0135208	-0.0134813	0.00443353	0.00214006	0.00344201	-0.00247194	-0.00584313	-0.00233591	0.00240892	-0.00132301	0.000540029	0.00204366	0.000948181	0.00221621	-0.00178046	-0.00103663	0.00242198	-0.000283142	-0.000277694	-0.000929036	-0.00102656	-0.00107823	-0.000487113	0.000215189	-0.000427756	0.000370905	0.000556301	0.000547432	0.000823995	-9.58266e-05	0.000555005	9.10291e-05	0.000645415	-4.1999e-05	0.000293303	0.000227058	0.000162	0.000544912	-0.00016361	0.000190567	-3.17537e-05	-0.000337001	6.96389e-05	-8.5038e-05	-1.5926e-05	0.000144376
BR-ITA-4-15-f-RV-#3-#290	-0.00212762	-0.0331606	-0.0376096	0.0155995	0.0150597	-0.00474693	0.0106428	-0.00548559	-0.00301093	0.00570733	0.0062517	0.00413605	0.00205734	0.00187928	0.00197673	0.00281537	0.000785604	-0.00110463	-0.000660198	-0.000302435	0.000315035	-0.00169163	0.000923955	0.000286651	-0.000757419	2.22436e-05	-0.000375983	0.000313627	-0.000395682	-0.000209554	0.000262948	0.000266347	-0.000183299	0.00035426	3.33949e-06	-0.000551046	0.000310115	0.000367966	0.000302913	-3.8369e-06	0.000621855	0.000429284	-9.42448e-05	2.75848e-05	9.86838e-05	7.95417e-05	-0.000155459	-0.000420589	0.000180065
BR-ITA-4-15-f-RV-#4-292	0.00182294	0.00631282	0.00425295	0.00362497	0.0110692	-0.00651882	0.000361456	0.000324108	0.00126793	-0.00500597	0.000155646	0.000749283	0.00170099	-0.00355705	-0.00329543	0.00109193	-0.000721974	0.000376201	0.00173532	-0.000601746	-6.06811e-05	-0.00133808	0.000344598	0.000147858	-0.000491408	0.000335037	-0.000250631	0.000130242	0.000250548	-0.00048313	-0.000597174	0.000687218	0.000449135	0.000507679	-0.000467109	-0.000178707	0.000337505	0.000348403	-0.000211788	0.000288452	0.000467311	-0.000155439	-0.000166304	0.00024792	0.000491886	-0.000562929	0.000204685	-0.000147385	-6.51856e-05
BR-ITA-4-15-f-RV-#5-#294	-0.0069177	0.000165941	-0.00128575	0.00764798	0.00417909	0.00365123	-0.0115935	-0.00199969	0.00932828	-0.00821649	-0.00333863	0.0043339	0.00125702	0.00133741	0.001639	-0.00108719	0.00119783	0.00264613	-0.000810026	0.00194462	0.000503051	-0.000615514	0.000389609	0.000295193	-0.00163448	0.000153661	-0.00119175	0.000484796	-0.000418508	0.000119972	-0.00137372	0.000306556	-0.000702067	1.79485e-05	0.000723252	-0.000311935	0.000470989	0.000259769	-0.000451786	-0.000293768	7.29898e-05	0.000334948	-0.000252688	-0.000146404	0.000215213	0.000191287	5.17517e-06	0.000278378	-9.71092e-05
BR-ITA-4-15-f-RV-#7-#298	-0.0116543	-0.00692106	0.00135355	0.00735826	0.00539843	-0.0075922	0.00097241	-0.00564715	0.00282378	0.00106551	-0.00489438	-0.000903049	0.000507456	-0.00278965	-0.00359437	-0.000570905	-0.00271057	0.00176411	0.00229092	-0.00199146	-0.00026325	-8.71944e-05	0.000154719	-0.000395696	0.000764871	0.000569003	0.00116225	-0.000565193	-3.95085e-05	0.000585625	-0.000986025	0.000374245	-4.87074e-05	0.000176853	-0.000191413	0.000717414	-3.34171e-05	-0.000194432	-0.000444936	0.000244728	0.000472436	-0.000420822	0.000303237	9.82663e-05	-0.00041765	-0.000157267	8.65774e-05	-6.97091e-05	-6.44259e-05
BR-ITA-4-15-f-RV-#8-#301	-0.0263125	-0.00993935	0.0145736	0.00388233	0.00179699	-0.00521473	-0.00601906	0.000567581	0.000722912	-0.00107661	0.000133846	0.000255955	0.00153048	0.000625011	0.000824463	0.00146447	-0.00211522	-0.00455777	0.00035907	0.000464969	0.00184998	-0.00177209	0.0017252	-0.00115643	-0.000266901	0.000378243	0.00130163	-0.00299382	-0.000222217	0.000429199	0.000352103	-0.000744859	0.000211842	-0.000238397	0.000294289	4.6513e-05	7.02777e-05	-9.28996e-05	-0.00037325	1.84863e-05	5.64496e-05	0.000345942	-0.00017302	7.35763e-05	0.000139918	0.000370503	-0.00043639	0.000359534	-0.000179375
BR-ITA-4-15-f-RV-#12-#308	-0.0210706	-0.0102386	-0.0140172	0.00205934	-0.00484359	-0.003489	-0.0110471	0.000759454	0.00295055	-0.000406965	0.00489239	-0.00587881	-0.0006841	0.000558057	-0.00230442	-0.00179112	-0.00336817	-0.000283431	0.00189427	-0.00104824	0.0024698	0.00286546	-0.000109636	-0.000259755	-0.000101365	-0.0010672	-0.00181273	-0.000687973	0.000161115	-0.000246378	0.000656001	0.000637992	-0.00127549	0.000197587	-0.000286911	-0.000104004	-0.000164657	-0.000546753	-8.95658e-05	-0.000434763	-0.00023015	-0.0005099	-0.00012118	-0.000281703	4.35714e-05	0.000130515	-0.000211693	-9.49061e-05	0.000342616
BR-ITA-4-15-f-RV-#13-#311	-0.0307725	-0.0180447	0.000602359	0.0101247	-0.00604912	-0.00598844	-0.0069046	0.000103618	0.00760615	0.00174852	-0.00119959	-0.000641202	0.00384805	-0.00265329	-4.76495e-05	-0.00299801	-0.0011578	-0.000433601	-0.00163933	0.000643896	-0.00252018	0.000902048	0.000928572	0.000563641	-6.18603e-06	1.92953e-05	0.000125192	-0.000894496	-0.00125225	0.00103507	0.000295278	-0.000174421	0.000359593	8.06902e-06	-0.000123591	-0.000719842	-0.000520838	0.000166149	0.000311579	0.000140278	-0.000590675	-0.000317074	0.000282924	0.000152911	-7.67062e-06	-0.000460246	0.000140086	-0.000120582	0.000111669
BR-ITA-4-15-f-RV-#14-#313	-0.00119661	-0.0083197	-0.00034982	0.0177912	-0.0178666	-0.00366516	0.000739395	0.00113391	-0.00378802	-0.00237736	0.000423344	-0.00158316	0.00155905	-0.000823964	0.00191863	-0.00223886	0.000906298	0.000774199	0.00118168	-0.00141227	-0.000158744	0.000536596	-0.000878659	7.57635e-05	0.00117844	0.000545791	-0.00199807	0.000229325	-0.000351245	0.000288988	-0.000152757	-0.00067077	0.00049842	-0.000136265	0.000249702	-0.000547822	-0.000762992	6.34864e-05	-9.69543e-05	-0.000449503	0.000312455	0.000675208	-0.000308277	0.000212536	-0.000656834	-0.000183345	0.000135068	0.000345996	-0.000308458
BR-ITA-4-15-f-RV-#15-#314	-0.00937642	0.00438053	-0.00420459	0.00783935	0.00959974	0.00343738	-0.00396985	0.00556954	-0.00276894	-0.0045767	0.00149567	0.00197764	0.000577297	-0.0017136	-0.0017499	-4.61719e-05	0.000714483	-0.00279587	0.00070154	-0.00197524	-0.000722162	-0.000536997	-2.85218e-05	-0.000266884	-0.0001497	0.000890239	0.000243021	0.000240952	-0.000534208	0.000151479	3.95762e-05	-0.000468883	-0.000169694	0.000280858	0.000348081	0.000172238	-2.93899e-05	0.000275045	-0.000769093	-0.00045304	-0.000568917	0.000175059	0.000312731	0.000151717	-0.000438185	-0.000198637	8.69851e-05	-0.000288574	0.000251354
BR-ITA-4-15-f-RV-#16-#318	-0.00552697	0.00235949	0.00419272	0.00557703	0.010567	-0.0172965	0.00824671	0.00649925	0.00703247	-0.0076923	-0.00351773	-0.00509168	-0.0051166	0.00178706	0.00226491	0.000898038	0.000948815	0.00261209	-0.00268307	-0.000694868	-0.000323595	-0.0003359	0.0010815	0.00249274	-0.000439754	0.000377338	0.00056814	-0.000450203	-0.000366533	-0.000292102	0.000222608	-0.000418459	8.84138e-05	-0.000160885	-0.000933246	-0.000188713	-0.00067231	4.97185e-05	0.000415073	-5.01664e-05	0.000386737	-0.000164954	0.000139313	-0.000225487	6.43102e-05	0.000106556	0.000199507	0.000115675	8.1208e-05
BR-EM-3-15-f-RV-#23-330	-8.80593e-05	0.0112285	0.000664577	-0.00391768	0.0121909	-0.0118309	-0.000526031	-0.00778578	-0.000334004	-0.00393019	-0.00141687	0.00549408	-0.0016476	0.000543854	-0.00268585	-0.00222948	-0.00260595	-0.000217556	-0.000665633	-7.07753e-05	0.000687499	-0.000598547	0.00116011	-0.0012792	-0.000543204	-0.000722804	-0.000124726	0.00146793	-0.000156913	0.000418336	0.000607374	-0.000259474	2.15325e-05	0.000221501	-0.000297122	-0.000197244	0.000435346	5.79962e-05	6.50741e-05	-0.000672326	-0.00024282	-0.000234394	0.000190649	0.000207913	-0.000399165	3.73526e-05	0.000591833	4.17619e-05	-0.000157876
#354 -BR-PTO-4-15-f-RV	-0.00884297	-0.00500854	-0.00152134	0.00180045	0.0183807	0.00205081	-0.0076851	0.0049753	0.00307605	-0.000611275	0.00367668	0.000743852	-0.00346523	-0.000714752	0.000463353	-0.000852587	0.00170644	-0.00232609	-0.000710004	-0.00125898	-0.00114074	0.000750278	6.56234e-05	0.000881551	9.51155e-05	-0.000165401	0.000757068	0.000859603	0.000837343	-7.76998e-05	0.000724459	0.000543215	0.000350304	-0.000126799	0.000212728	0.000148944	-7.59986e-05	4.8066e-05	0.000355335	-5.21764e-05	3.73174e-06	0.000252693	3.69187e-05	-0.000414416	7.21338e-05	-0.000103848	0.000318673	0.000411254	-5.69183e-06
#357-BR-PTO-4-15-f-RV_	0.00217175	-0.000263964	0.00212523	0.00532058	0.0132753	-0.00554576	0.000965972	-0.00358719	-0.00589321	-0.00207586	0.00128834	0.000361666	-0.000342305	-0.000640416	-0.00209089	0.000624383	0.00125798	-0.00277495	-0.00112057	-0.000141555	0.000704816	1.38414e-05	0.00149197	0.00100557	-1.21245e-05	-0.000934117	-0.00118434	-0.000234272	-7.3211e-05	-0.000296071	-0.000300804	0.00088714	-0.000295461	-0.00013563	8.55208e-05	0.000233982	6.62277e-05	0.000159544	0.000283851	0.000244033	-0.000363033	0.000353672	-3.04806e-05	-0.000132376	-0.000340125	-0.000390062	-9.72238e-05	-0.000106221	-0.000620288
#358 -BR-PTO-4-15-f-RV-#35	-1.70648e-05	0.00279647	-0.00377101	0.00385503	0.00709154	-0.00168891	-0.00395017	-0.00208523	-0.00302627	-0.00332692	0.000338794	-0.000841011	0.000312151	-0.00114574	0.00113285	0.000345843	0.000849301	0.000895703	-0.000188419	-0.00106745	0.00067909	0.000126886	-0.000463307	0.000496642	0.000536736	-0.000762423	0.00134703	0.000434169	-0.000488979	0.000584117	0.00158557	0.00134067	0.000623972	-0.000224071	-0.000441878	0.000215304	0.000434357	-0.000297325	-0.000262269	-0.000299269	-0.000411452	0.000191656	0.000322831	0.000182501	0.000171702	0.000395119	3.29062e-05	0.000224253	0.000269968
[truncated: 34 more columns]

## Sheet: RWs_Males_LV
Specimens	rw1	rw2	rw3	rw4	rw5	rw6	rw7	rw8	rw9	rw10	rw11	rw12	rw13	rw14	rw15	rw16	rw17	rw18	rw19	rw20	rw21	rw22	rw23	rw24	rw25	rw26	rw27	rw28	rw29	rw30	rw31	rw32	rw33	rw34	rw35	rw36	rw37	rw38	rw39	rw40	rw41	rw42	rw43	rw44	rw45	rw46	rw47	rw48	rw49
#437_FL-CAL-14-3-m-LV	-0.0112967	0.0171556	-0.00577722	0.0057927	-0.00654324	0.00656308	-0.00848015	0.00847723	-0.0048705	0.000796944	-0.00945772	7.06e-05	-0.000767118	0.00111214	-0.00332611	0.000504851	-0.00143853	0.000783266	-0.00315421	0.00025854	-7.90995e-05	0.00106018	-0.00275966	0.000464874	-0.000351542	0.000282541	-0.000958438	0.00116373	-0.000200914	0.00055143	-0.000402848	0.00105068	-7.22135e-05	0.000270006	-0.000343519	0.000344622	-0.000756814	8.90461e-05	-3.47629e-05	-1.32929e-05	0.000203186	8.73567e-05	0.00011123	0.000131899	6.951e-05	0.00013151	-9.88159e-06	4.75097e-05	-1.68319e-05
#441-FL-CAL-14-3-m-LV	-0.028872	0.0185505	-0.0171984	0.00607938	-0.00569606	-0.00450921	0.00591815	0.00171286	0.0036346	-0.000813276	-0.0042657	0.0018104	-0.000956726	0.00127093	-0.00215741	-0.00025573	0.000996079	0.00203535	0.00105028	-0.000165364	-0.00257829	-0.00092841	0.000517549	0.000481553	0.00126408	0.0010441	-0.00013757	0.000288923	-0.000988064	-0.000400197	0.000383827	-0.000178432	0.000156865	-0.00018132	0.000160057	4.79703e-05	0.000326628	6.59487e-05	0.00077676	-0.000160184	-0.000641153	-0.000346014	0.000254589	-0.000294306	-0.000138396	0.000101849	-0.000388841	0.000181826	-3.96851e-05
#441a-FL-CAL-14-3-m-LV	-0.0130371	0.0135152	-0.00208177	0.00864902	-0.00605208	-0.00834961	-0.00647039	-0.0039778	0.00834057	-0.00300007	-0.000109472	-0.00171344	-0.000863437	-0.000158842	-0.00418267	-0.00204414	-0.00305347	-0.00119033	0.00103205	-0.000978678	0.000911167	-0.000986965	-0.000534975	0.000945752	0.000355874	-0.000262358	0.000696755	0.000176097	0.000972295	-0.00135494	-0.000839221	-0.000332285	0.000482501	-0.000437563	-0.00043238	-6.98412e-05	3.9065e-05	-5.92723e-05	-2.92726e-05	-0.000200456	0.000190354	0.000306069	-4.41064e-05	0.000140349	-0.000261153	-0.000167085	6.85214e-05	-0.000274237	-0.000131757
#446-FL-CAL-14-3-m-LV	-0.0150157	-0.0129605	0.00544778	0.0045139	0.00214383	-0.00622705	0.00301597	0.00104286	0.0029423	-0.000651299	0.00457772	0.00108615	-0.00437399	0.000377952	-0.000214709	-0.000359561	-0.00159284	0.000137214	-0.000163347	-0.000420949	0.000349642	-0.00030262	-0.000761605	-0.000846441	-0.000662903	-0.000810904	-0.000313145	0.000621828	0.000516972	0.000722368	-0.000430034	0.000615742	-3.70059e-05	-0.000947055	-0.000583411	0.000315997	0.000324212	-7.03548e-05	-0.000134297	0.000924517	-0.000636722	-0.000157625	-0.000229466	-0.000189341	-8.63036e-05	0.000366134	6.4483e-05	-0.00020803	8.38686e-05
#460-FL-CAL-14-3-m-LV	-0.010589	-0.00515504	-0.0106391	0.000559431	-0.00243805	0.0021336	0.00863286	-0.0160907	-0.00392673	-0.00260253	-0.00480257	-0.000225912	0.0039189	0.00177441	0.00599827	-0.00060025	-0.00142441	-0.00099199	0.00140483	0.00302943	0.00038233	-0.000860738	-0.000991474	0.000229989	0.000322821	-0.000552082	-0.000361223	0.000609027	0.000488383	9.44409e-05	0.000129405	-0.000304237	0.000395604	0.000223341	-0.00056538	-0.00047022	-0.000685318	0.000255834	-0.000207201	-0.00012431	-0.00019411	-0.00027213	2.95995e-05	-0.000121326	-0.000133037	0.000203282	0.000201196	0.000162641	4.8873e-06
#461-FL-CAL-14-3-m-LV	-0.00654438	0.0207224	0.0334019	-0.0150909	-0.0213943	-0.00578638	-0.00423947	-0.00322611	-0.00493531	0.00210246	0.000932797	0.0090935	0.00253852	-0.00121824	0.00225006	-0.00027688	0.00234988	0.000606041	0.000648567	-0.00102607	-0.000512951	0.00143127	0.00100512	0.00121226	-0.000948716	-0.00106063	0.000814461	0.00030072	-0.000621503	-0.000509494	-0.000224569	0.000440581	0.000268556	0.000154277	-0.000142718	6.02998e-05	-0.000110316	0.000183317	-3.72346e-05	0.00017658	-0.000379754	0.000301678	7.2857e-05	-2.8159e-06	-7.24854e-05	4.41348e-05	2.99536e-06	6.56892e-06	-5.24965e-05
#462-FL-CAL-14-3-m-LV	-0.00970009	-0.0168263	0.0087582	0.00668228	-0.0174861	-0.00362973	0.000973475	-0.00559266	0.000120708	-0.00478495	0.00259129	-0.000679587	0.000689379	0.00222795	-0.00178066	-0.00208687	0.000903833	0.00215232	-0.00352822	-0.00182442	0.000552928	-0.000265239	0.00104726	-0.000849435	-0.00150827	0.000831812	-0.00073679	-0.00109048	0.000468066	8.6971e-05	0.000710592	-0.000187153	-0.000228798	0.000131131	0.000409479	-0.000545269	-0.000944235	-0.000238583	0.000345223	0.000137951	0.000165371	-0.000252245	-0.000118598	0.000129259	0.000141925	-2.56566e-05	-0.000129594	-9.0826e-05	-6.06554e-05
#464-FL-CAL-14-3-m-LV	-0.00566178	0.00657193	-0.00451154	-0.00589151	0.00122769	0.00749788	0.00499944	-0.00176152	-0.00368218	-0.00595372	0.00124175	0.00239955	-0.00473167	0.000383454	0.000544715	0.00210716	-0.00111733	0.00280498	-0.000986918	-0.0019727	0.000155229	-0.00155116	-0.000761447	0.000904248	-0.000755638	-0.000496221	0.000646823	-0.000789821	-9.97692e-05	-0.000804636	-0.000109357	-0.000115999	0.000682413	-0.000293644	-2.781e-05	0.000479955	-7.9319e-05	-0.000178677	-0.000379907	0.000213209	0.000402601	-0.000522032	0.000363319	-0.000136445	-6.59851e-05	-0.000307599	2.00981e-05	0.000162119	0.000331193
#466-FL-CAL-14-3-m-LV	-0.00556176	0.0186498	-0.00868164	-0.0101613	-0.00912017	-0.000621805	-0.0080048	7.77175e-05	0.00463826	-0.00297714	-0.00032951	-0.00435348	-0.00149586	-0.00109854	-0.00115467	-0.00101992	0.00197097	-0.00311241	-0.00114907	-0.00101391	0.00135259	-0.00112171	-0.000648985	0.00055498	0.000575645	-0.00055034	-0.000441944	0.000199557	-0.000928904	-0.000128706	-8.08156e-05	-0.000192093	-2.20305e-05	0.00108336	0.000676012	-0.000918927	0.000193833	0.000348049	-0.000154377	0.000249503	-0.00012283	9.47462e-05	-0.000174939	-0.000159032	-4.46219e-05	-2.56947e-05	0.000213343	-0.000122112	0.000320989
#467-FL-CAL-14-3-m-LV	-0.0163301	-0.0319344	-0.00480733	0.00617277	-0.0109124	0.00360626	-0.00146806	-0.00580465	-0.00362192	0.00429382	0.00653517	-0.00560365	-0.00250407	-0.00444102	-0.000636568	-0.0013081	0.0031259	0.000313125	-0.0027486	0.00125672	0.000815007	-1.55721e-06	0.000197967	-0.000301163	0.00135933	-0.000451235	0.00101887	0.000571383	-0.000850776	0.000216811	-0.00110021	-0.000605964	0.000144904	-0.00015074	5.6077e-05	0.000502845	-0.000163622	8.38422e-05	0.000147741	0.00012788	0.000208383	9.97892e-05	0.000201691	0.000118449	-0.000110884	0.000135139	-7.45849e-05	0.000252774	-0.000109458
FL-CAL-3_#56_m_LV	-0.00513338	-0.000312215	-0.00391691	-0.0091111	0.000483974	-0.000453237	0.00584035	-0.000723091	-0.00555516	-0.00243199	0.00783674	0.00120955	0.00274931	0.000365794	-0.00115423	0.00323443	0.00213184	0.00031585	-0.000884051	0.0023276	-0.00170922	-0.000400207	-0.00188087	-0.000278242	0.00125473	-0.00062562	-0.00066806	3.38497e-05	-0.000120311	-9.94501e-05	0.000983453	0.000436341	0.000309648	-4.64711e-05	0.00011816	0.000272726	0.000194657	-0.000120488	-0.000262185	-0.000162566	0.000385956	0.000212765	0.000152575	-4.50754e-05	-0.000151	-0.000225445	-0.000124299	-0.000538721	-4.43266e-05
FL-CAL-14-3-m-LV-#80	-0.0130562	-0.0158108	0.00923496	-0.017297	0.00970945	0.00898725	0.000903578	-0.00175487	0.00749689	-0.000117774	-0.00840867	-0.001149	-0.00140686	-0.00324648	0.00246894	0.00247544	0.000204962	0.00114449	0.00112863	-0.00160527	0.00167899	-0.000864894	0.000269955	-8.41394e-05	0.00076645	2.79624e-05	0.000524417	-0.000960771	-0.000920638	7.84041e-05	0.000301229	0.000939879	-0.000191378	-0.000557888	0.000204053	0.000138053	-0.000398002	0.000152323	0.000396064	-0.000253645	9.36735e-05	-0.000104622	-6.07654e-05	0.000385752	-0.000214861	0.000121832	0.000239895	-0.000219457	-0.000158225
FL-CAL-14-3-m-LV-#74	-0.00299204	-0.00835411	0.00132693	-0.00420137	-0.000540803	0.000653271	-0.00230464	-0.00607256	0.00185274	-0.00523458	-0.00141471	0.00144451	0.000603777	0.000910578	-0.0021824	0.000669733	-0.00388199	-0.00205713	-0.00132233	0.00342114	-0.000939493	0.00143291	-0.000971479	-2.09822e-05	-0.00112963	0.000227846	0.000934305	-0.000963742	-0.000201967	0.000536388	0.000131327	-9.22942e-05	0.000213686	-0.0004184	0.000358461	-0.000559109	0.000364936	-0.000131349	0.000302221	0.000139131	-0.000225965	0.000524239	0.000119534	0.000350097	-0.000184179	-0.000185401	-0.00022241	0.000201237	-4.68326e-05
MX-SiNo-1a-14-m-LV-#209	0.0161381	-0.00174467	0.00518775	-0.00224803	-0.000562143	-0.000174013	-0.00399695	0.00330341	-0.00741557	-0.000338058	0.00130859	-0.00320102	-0.00233047	0.00251795	0.00344607	-0.00247554	-0.00341543	-0.00193838	0.000112192	-0.000983824	-0.000713168	0.00139856	-0.000526671	-0.000272341	0.00106877	-0.000900379	0.000246848	-0.00152171	-0.000134909	-0.000452883	-0.000741356	-4.14984e-05	-7.87719e-05	0.000698909	-0.000229015	0.000450923	0.000226591	0.000195072	0.000254919	-0.000412459	-0.000163691	-0.000513054	-5.84007e-05	0.000308207	5.61094e-05	7.46241e-05	-0.000287303	-2.85303e-06	0.000117347
MX-SiNo-1a-14-m-LV-#203	0.00922773	0.0151207	-0.000760115	0.0026221	0.00623634	0.00416386	-0.0140477	-0.000172599	-0.00166376	0.00231647	0.00218369	-0.00237034	-0.00172731	0.00176911	0.00296157	-0.00340434	0.0004327	-0.000995095	0.00151253	-0.0010916	-0.00195152	-7.26536e-05	-0.000335598	-0.000732512	0.000188537	-0.000125032	0.000427353	-0.000182226	0.000188381	0.000877861	0.000152315	0.00028057	0.000808083	-0.000771871	0.00101014	4.62725e-05	-0.000831849	-3.7214e-05	-0.00010989	-9.99821e-06	-0.000250553	-0.000123309	-0.000279611	-0.000452308	-8.39533e-05	-0.000245514	-6.97901e-05	-8.00382e-05	-0.00013812
MX-SiNo-1_#11_m_LV	-0.00316273	-0.0140705	0.0408908	0.00929673	0.0219765	0.0107346	0.00518932	0.000373699	-0.00374521	-0.001313	-0.00476926	0.00496414	-0.00435549	0.00131942	-0.002571	-0.00445293	0.00126252	-0.000811691	2.65273e-05	0.00215739	-8.61173e-05	-0.00107712	8.72176e-05	0.000551743	0.000163226	0.000738016	-0.000678254	0.000229584	-0.000189501	-0.000528298	-0.00039558	-0.000528415	-2.41256e-05	0.000451427	0.00051086	-2.46427e-06	0.000142021	-8.41681e-05	-0.000319959	5.01919e-06	8.49142e-06	5.32006e-05	-1.6066e-05	-2.13275e-05	-9.91792e-05	3.38886e-05	-3.29544e-05	-0.000108792	-0.000100733
MX-Sil-1-14-m-LV-#277	0.0177698	0.00198387	0.00966523	0.00927711	0.000894483	-0.00428568	-0.00423309	-0.00558294	0.00222112	-0.00691358	-0.00510546	-0.00122454	0.00251808	-0.00472281	0.000783557	-0.00128633	-6.63491e-05	0.000895388	-0.000306555	-0.00166486	-3.37624e-05	0.00274688	-0.000470045	-0.0021375	0.000868746	0.000368951	-0.000249516	0.000580304	0.000297902	-0.00105346	0.000577152	6.86374e-05	1.06152e-05	6.03446e-05	-0.000129346	0.000117724	0.000504686	0.0003058	-0.000198981	0.000415036	0.000279971	-0.000351306	0.000323657	-0.000276193	0.000157726	-4.14664e-05	1.54617e-05	4.30158e-05	-0.000201035
MX-PuL-1-14-m-LV-#167	-0.0209194	0.00936097	-0.00553133	0.00143011	-0.00025747	0.000630125	-0.000288167	-0.00024221	0.00259213	0.00453603	-0.00218547	-0.000694213	-0.00183273	-0.000798362	0.00286352	0.0026284	0.000334558	-0.000695702	-0.000956821	0.00259556	0.0011945	-3.06191e-05	0.0018306	-9.07531e-05	-8.80562e-05	-0.000730669	-0.000287594	-0.000782597	0.00120897	-0.000598357	-0.000453996	0.000837503	-0.000351023	0.000390348	-5.75165e-06	-0.000206497	4.51666e-05	0.0001142	-5.44979e-06	5.25026e-05	0.000210821	-8.13652e-06	-3.60004e-05	-0.000251718	0.0002093	0.000128642	-0.00061208	-0.000312083	-8.35706e-05
MX-PuL-1-14-m-LV-#154	-0.028917	-0.00146859	0.00065647	-0.00184982	-0.00326279	-0.00217302	0.00179496	0.00795159	-0.0035123	0.00286092	-0.00124729	0.00243291	0.00116175	-0.00187495	4.67991e-05	-0.00097867	-0.000525446	-0.00345358	-6.21214e-05	0.000442962	0.00143071	0.00108809	0.000485611	-0.000454776	0.000750353	0.0004431	-0.00137501	-0.00149915	-0.000566069	-0.000289264	0.0006723	-0.000543001	0.000164575	-0.000362772	-0.000795587	0.000110422	-5.49053e-05	-0.000592988	7.12619e-05	0.000208758	0.000234092	5.41669e-05	-0.000475937	-0.000461138	-0.000160039	-7.59054e-05	0.00018299	0.00018989	0.000135674
MX-PuL-1-14-m-LV-#149	-0.0310402	0.00715134	-0.00300965	0.0113647	0.00635334	-0.00394149	-0.00365974	0.0019028	-0.000132737	0.0038858	0.00284152	0.000715954	-0.000503035	-0.00226242	0.00184164	-0.00108198	3.30132e-05	0.00229288	5.61944e-05	0.000594444	0.00249525	-0.000170286	-0.000162752	-0.00101202	-0.00132451	-0.000109226	-0.000147904	0.000571793	0.000637672	-1.95043e-05	0.000434687	-0.000279455	0.000580573	0.000722025	0.000148881	0.000424836	0.000193366	-0.000324751	6.73934e-05	-0.000876911	-0.000584859	-7.94035e-06	0.000125941	0.000145176	0.000155293	-0.000268311	0.000230835	-5.12951e-05	-2.14712e-05
MX-LG-1-14-m-LV-#271	0.011456	0.00710716	-0.00575862	0.0139545	0.00678021	-0.0097313	0.00598544	-0.000611299	0.00268097	-0.00106584	0.00170815	0.0031876	0.00206086	-0.000309128	0.00126569	-0.00103518	0.00160025	-0.00195498	-0.00192174	-0.00119893	-0.00196394	-0.000839203	-0.00113189	0.000517947	0.000114776	-0.000830713	-2.68927e-05	-0.000809744	-0.000590772	0.000458819	-0.000862322	7.51366e-05	-0.000913156	0.000112131	-1.58137e-05	-0.000335195	-1.02989e-05	-0.000533331	0.000107577	-0.000220546	2.86764e-05	-0.000256493	0.000300746	-0.000205577	3.12347e-05	0.000129296	0.000298109	-0.000184477	-0.000290399
MX-LG-1-14-m-LV-#267	0.0156475	-0.00255835	0.00546623	0.0119173	0.00707672	-0.0129999	0.00170377	-0.00195737	0.000594596	-0.00248984	0.00181904	-0.00358358	-0.000713968	-0.00239807	-0.000250726	0.00434904	-0.00122705	-0.00118324	0.000333544	-0.00166961	0.000858932	-2.20697e-05	-0.000210124	0.00145885	9.84543e-06	-0.000734358	-0.000580547	0.00029357	-0.000455991	-0.000303325	0.00105999	0.000153493	-0.000441045	0.000345615	0.00044358	0.000586475	-0.000423774	-0.000507559	-0.00055317	-0.000156809	-0.000318013	0.00026014	-0.000325499	0.000114402	-0.000277673	0.000135474	-0.000300953	0.000343628	-0.000143411
MX-LG-1_#11_m_LV	0.0144609	-0.00137319	-0.00776089	0.0055059	0.00800932	-0.00165451	-0.00745744	-0.000913229	0.00150374	-0.00587301	-0.00135483	0.0047259	0.00179982	-0.00551647	-0.00167654	0.000263481	0.000360503	-0.000192351	-0.00160926	0.00163015	-0.00226185	-0.000752663	0.00176993	-0.000447588	0.000633937	0.000357522	0.000672954	-6.78016e-05	0.000357472	0.000185722	0.000252856	-1.56497e-05	0.000717176	5.62664e-05	0.000141169	0.000372491	-0.000235429	0.000136456	-0.000167518	-0.000181586	-0.000104693	2.90479e-05	-0.000364744	0.000184746	0.000218547	0.000441156	3.43153e-05	-0.000108104	0.000454688
MX-CG-1-14-m-LV-#220	0.01696	-0.00386491	0.0119337	-0.0043931	-0.00154602	-0.00661464	0.0014016	0.00602859	-0.00335289	0.00281173	0.00206832	-0.000855125	-0.00101507	0.00227052	-0.00072421	0.0026704	-0.0019017	0.000297667	-0.00150723	-0.00034537	0.00107014	-0.000224806	-0.000757258	-0.00105781	0.00060824	0.000831232	0.000914279	0.000125722	-0.000824524	-0.000474029	0.000403703	-0.000716281	0.000753465	-0.000553835	-0.000504181	-0.000530849	-0.000222907	0.000534356	5.59061e-05	-0.00059279	-6.81626e-05	0.000297239	-4.44743e-05	-0.000275625	0.000276153	0.000273296	4.50545e-05	-0.000175894	-0.000159496
MX-CG-1-14-m-LV-#219	0.0140572	0.0257618	-0.00401604	0.00189691	0.00143399	0.00390908	-0.00869286	0.00221631	-0.00391877	0.00110553	-0.0020379	-0.000114505	-0.000615429	0.000474841	0.00217748	-0.00134552	0.0023227	-0.00109701	-0.0014485	0.00161202	0.000786765	-0.000844584	0.000681296	-0.000327974	0.000146854	0.000580968	0.00203403	0.00062371	0.000496936	-0.000454735	0.000685287	5.37721e-05	-0.001343	-0.00074457	-0.000519872	-0.000168371	-3.4366e-06	-0.000815968	-3.47901e-05	-7.0581e-05	0.000127663	-9.48727e-06	0.000150305	7.41067e-05	-0.000220082	-6.02127e-05	2.64959e-06	9.24719e-05	9.35408e-05
MX-CA-1-14-LV-m_#413	0.01053	0.019561	-0.0264408	0.00700717	0.0048873	0.00300702	-0.00359094	-0.000171418	-0.00230559	0.00108796	0.00246015	0.00592098	0.00235053	-0.000376836	-0.00228461	0.000641405	-0.000137452	0.00101312	0.00109905	0.000288217	0.00298074	0.000718037	0.000593888	0.000609357	-0.000780942	0.000925517	0.000383699	-0.00145769	-0.000568275	0.000722544	-0.000530067	-8.68185e-05	0.000483932	0.000108752	0.00023746	-2.73104e-05	0.000276898	0.000140385	-0.000619742	0.000143743	0.000156714	-0.00022096	0.000152909	-1.2491e-07	-5.16218e-05	0.000319494	3.59632e-05	2.86931e-05	-0.000278417
MX-CA-1-14-m-LV-#251	0.0284152	-0.00557056	0.00342216	-0.00753796	-0.00857134	-0.000287336	0.00111784	0.00209071	0.000126136	-0.00294277	0.00358713	0.0010166	0.00334256	-0.00176476	0.00285618	-0.00197527	-0.00126527	-0.00109983	0.000632546	0.000383197	0.00295802	-0.00225923	-0.000567714	0.000709845	0.000943656	0.00220446	-0.00108234	1.28437e-05	0.000375959	0.000214802	-0.000437735	0.000548596	-0.000261016	-0.000236781	0.000324801	0.000575979	-5.25919e-05	0.000134515	0.000289044	0.000205653	-0.000357661	0.000340584	0.000472724	-0.000138226	0.000189907	-0.000166139	-0.000149716	1.76307e-05	9.30065e-05
MX-CA-1-14-m-LV-#250	0.00333104	0.00575443	-0.00128413	0.00796233	0.00590173	0.00934228	-0.00351424	-0.00544207	0.00754028	0.00811584	0.000566677	0.00188577	0.00161249	0.00334766	0.00206497	-0.0020146	0.000204297	-0.000336398	-0.00032426	-0.00230659	0.000454504	0.00160137	0.000562434	0.000399561	0.000896688	-0.000650518	-0.0014294	0.000431739	-0.000216437	0.000605997	0.000718045	-0.00056548	0.000642585	-0.000369246	-8.08411e-05	3.96306e-05	0.000206125	-0.000149194	4.35879e-05	0.000107235	0.00035596	0.000285434	0.000451758	0.000404328	-0.000173782	0.000108483	-0.00019852	-0.000111635	0.000201172
MX-CA-1-14-m-LV-#242	0.0149844	0.011621	0.0182476	-0.00584704	-0.0117855	0.000862978	0.00577789	0.00319027	0.0116544	0.00254423	0.00181581	0.00245956	-0.00265852	-0.00210903	0.00165444	-5.88477e-05	-0.00418611	0.000335233	-0.00131463	0.00125628	-0.000854658	-0.00131637	0.000798278	-0.000452193	-0.000241664	-0.000531181	8.24557e-05	0.000782945	-0.000185507	0.00126292	6.19597e-05	5.95328e-06	0.000136082	0.000392319	-1.65648e-05	-8.42767e-05	0.000200051	-0.000169454	-8.15854e-05	-0.000384064	0.000679586	-0.000184399	1.68862e-05	-0.000352566	4.02884e-05	-3.96367e-05	-2.49513e-05	0.00027373	-3.94626e-05
MX-CA-1-14-m-LV-#229	0.014189	-0.000247488	0.00625031	0.00543812	-0.00140645	0.00328214	-0.00123198	0.00155354	0.000598941	0.00146148	0.00353147	0.00192744	0.000697538	-0.00476431	-0.000799922	0.00221874	-6.05819e-05	0.000193298	0.00149762	-8.97878e-05	-0.00111896	0.000994421	-0.000484337	0.00232174	-4.34832e-05	0.000529548	-0.000420816	0.000174543	0.000672381	0.000460662	-0.000165093	-0.000999517	-0.00038405	1.03987e-05	-0.000751846	-9.10366e-05	-0.000461218	4.59438e-05	0.000711048	-9.70184e-06	-1.51898e-05	-0.000459651	-0.000158088	0.000280599	4.87158e-05	-0.000154505	3.96793e-05	-0.000245383	7.06345e-05
MX-BC-1a-14-m-LV-#192	0.00641159	0.00495204	0.00472756	0.00477769	0.00127476	0.0174502	-0.00574866	0.00131441	-0.00181786	0.00110913	0.0027391	-0.00503546	0.00172493	0.00112118	-0.00220472	0.00204343	-0.00206798	0.00068814	-0.000495491	0.00170658	-0.000321432	8.04621e-05	0.00103932	0.00125507	-0.000241344	-0.00113524	4.71908e-05	-0.00032875	0.000641327	-0.000455355	0.000872682	-8.82676e-05	-0.00017679	0.000261918	0.000498109	0.000445436	0.000265981	0.000320916	0.000758495	0.000394963	-0.000106963	4.37283e-05	0.000121221	-0.000453715	-2.95348e-05	0.000149003	0.000454725	6.12468e-05	-0.00016824
MX-BC-1a-14-m-LV-#187	0.0148409	0.00255189	0.00696095	0.0076711	-0.000752251	0.0197021	0.00775021	0.00669267	0.00348271	-0.00188736	0.00438278	-0.00182051	0.00239803	-0.00224431	-0.0013574	-0.000638247	0.00223541	0.00161037	0.000274872	-0.000332251	0.00103016	0.000475101	-0.00134747	-0.00116993	-0.000398772	-0.000413855	0.000287585	-0.00029473	0.00014438	0.000138481	0.00011505	0.000495591	-8.94846e-05	0.000141472	-0.000545721	-0.000903355	0.000226563	0.000318436	-0.000160755	-0.000241377	-0.000523828	-0.000162859	-0.000164954	4.53778e-05	-0.000476271	-4.35077e-05	-0.000215576	0.000106405	0.000116639
MX-BC-1a-14-m-LV-#179	0.0199271	0.0113534	-0.00816653	-0.000278588	-0.00926502	0.0038978	0.0114256	0.0103433	0.000543416	-0.000510928	-5.40334e-05	-0.00244152	0.00178626	0.00298834	0.00216811	0.00109035	-0.00149738	0.0010209	0.00028404	0.00120938	-0.000209772	9.11835e-05	0.00177772	-0.000817978	0.000231333	7.1519e-05	-0.000233473	0.00103728	-0.000510805	-0.0010605	-0.000598307	-0.000400112	0.000508903	9.1174e-05	0.00050878	-0.000142964	-0.000329394	-0.000667872	-0.000158808	0.000583911	-0.000140742	-0.000136772	-0.000161915	0.000544896	-7.51426e-05	5.7184e-05	0.000121212	-0.000168631	-0.000108797
FL-PR-15a-14-m-LV-#124	-0.0106538	0.0191994	-0.010176	-0.00989972	0.0139907	0.00254088	0.0038279	-0.0101805	-0.00386587	-0.000845373	0.00783694	0.00152392	-0.00368923	0.000299481	0.000453044	-0.000740956	-0.00268451	0.000767736	0.00154697	-0.00107481	0.000364472	0.00148773	-0.000138044	-0.000721219	-0.000610638	0.00150326	0.000319997	0.00122087	-0.000774349	-0.000135648	3.4322e-05	9.44612e-05	-0.0010424	0.000497513	0.000156899	-7.67798e-05	-3.68574e-05	8.04702e-05	0.000433712	4.57473e-05	0.000365516	0.000158612	-0.000354813	-9.97076e-05	-5.64708e-05	0.000157207	-3.16084e-05	-0.000133004	9.76538e-05
FL-PG-3-13-m-LV-#62-#285	-0.0059452	0.00081208	-0.00767837	-0.0107607	-0.00503632	0.00568366	0.00369419	0.0022964	0.00426232	-0.000301818	-0.0026817	0.00269472	0.000678542	0.000929927	0.00174869	-0.000155819	0.00248258	-0.00281908	0.000295069	-0.00119194	-0.000328105	-0.00114122	-0.00262033	-0.00111053	-0.000999607	-6.31329e-05	0.00106143	-0.000118805	0.000522785	0.000157328	0.000590799	-0.000823712	0.000128873	0.000536894	0.000115229	0.000851839	0.000447103	-0.000156077	0.000309782	0.000372998	4.79412e-05	8.73956e-05	-0.00030732	0.000322998	0.000362742	0.00012682	-7.10964e-05	5.0115e-05	-0.000197535
FL-PG-3-13-m-LV-#27-#284	-0.0201447	-0.0284436	-0.000789694	0.00228026	-0.00279679	0.00615282	0.00477717	0.00279878	0.00043688	0.00409627	0.000539888	-0.00285056	0.00694792	-0.00252422	-0.00278126	-0.00160977	-0.00135285	-0.00209004	0.00352967	-0.0006558	-0.00112166	0.000854975	-0.000106581	0.000425455	-0.000706693	0.000486233	0.00121999	0.000577791	-0.00035511	-0.000300266	-0.000322248	0.000906677	0.000277393	0.00010007	0.000351479	-7.96395e-05	-0.000139933	-0.000507669	-0.000209074	-9.03148e-05	0.000318724	-0.000208042	-1.31248e-05	-0.000212474	0.000240222	-8.77184e-05	-8.98926e-05	-3.26358e-05	8.65509e-05
FL-LX-5-14-m-LV-#37	0.00900909	-0.0193596	-0.00405313	-0.000307795	0.017508	-0.00534884	0.00508933	-0.000309943	-0.00574593	-0.000302761	-0.00498032	0.00089372	0.00299238	0.0021418	-0.00112322	0.000716801	-0.00078486	-0.00036454	-0.00271799	-0.00232069	0.00229416	1.76737e-05	0.00110753	0.000853889	0.000266155	-0.00125617	0.00112962	0.000954707	-0.000175441	0.000691193	8.88747e-05	0.000160449	0.000314596	9.82712e-05	-4.72418e-05	-0.000442877	0.000345929	-0.000304054	0.000474649	0.000150501	-0.000226545	-5.95805e-05	4.33936e-05	-0.000192806	0.000292849	-0.000241168	-0.000102618	-9.8524e-05	0.000134578
FL-LX-3-14-m-LV-#27	-0.0167241	-0.00931159	0.00253565	-0.0082701	0.00667336	-0.00791531	0.00384206	0.00722665	0.00120136	0.00535131	-0.00171103	-0.00393914	-0.00044262	-0.000283079	0.0010732	0.000966684	-0.000662732	-0.000543616	-0.000259994	-0.00122235	-0.00154323	0.000393825	0.000194522	0.000493698	-0.000446336	0.00126514	0.00116465	-0.00028832	0.000890213	0.0004502	0.000500772	-0.000934996	-0.000406793	0.000560058	-7.99045e-06	-0.000101078	-0.000394711	0.000551749	-0.000731858	0.000390191	-0.000157786	7.33165e-05	0.000657776	-9.27e-05	-0.000270928	7.26404e-05	-2.62652e-05	-0.00011459	7.73662e-05
FL-LX-3_#37_m_LV	0.00485372	-0.0278569	-0.0113892	0.0307064	-0.0234376	0.00494987	0.00235016	0.000510412	-0.00551381	0.00246966	-0.00324961	0.00458208	-0.0037458	0.00103441	0.00306287	0.00163371	-0.000868881	3.86033e-05	0.00144866	-0.0019217	-0.000949981	-0.000591869	9.08863e-05	0.000142924	0.000141851	0.000279333	0.000207678	-8.53222e-05	0.000211808	-7.77063e-05	0.000346109	0.000335838	-0.000534623	-0.000134801	0.000463265	-0.000263926	0.000592352	0.000395022	-0.000177894	-0.000196183	0.000163504	0.000476712	-0.000180928	3.39845e-05	-1.72701e-05	-3.72946e-05	0.000192783	-7.59131e-05	0.000114235
FL-LX-2-14-maleLV-#22	-0.00246448	0.00276681	0.00281875	-0.000244806	0.0108108	-0.010613	1.96102e-06	0.00256228	-0.00160442	0.00174402	0.00202428	-0.00555315	0.00454867	0.00108884	0.00187566	-0.00495399	-0.00020898	0.00383368	-0.00046423	-0.00040925	-0.00184586	-0.00187394	2.95031e-05	0.000546919	-0.000632409	0.000240322	-0.000159732	-0.000773208	-7.42032e-05	-0.000259792	0.00011523	0.000876418	0.000215611	0.000286721	-0.000592003	-1.38327e-05	0.000388942	6.70431e-05	0.000179536	0.00010052	0.000365624	0.000509167	-0.000119278	0.000228686	-9.13251e-05	0.000226399	0.000125255	0.000163544	6.37083e-05
FL-EG-3b-14-m-LV-#52	-0.0121244	0.0164331	-0.0042304	0.010316	0.0120919	-0.00355501	0.00646805	0.00690834	-0.00218783	-0.0037526	0.00380015	0.00129311	-0.00179875	-0.00118015	-0.000791604	-0.000457864	0.000870768	-0.00344987	0.00198407	0.000178753	-9.48699e-05	-0.000773007	0.00134271	-0.000749648	-0.000463247	-0.00122385	-0.000348615	0.000258882	-0.000285377	-4.03287e-05	0.000300448	0.000319122	-8.95334e-05	-0.000458284	-0.000198295	-0.00026021	-0.000537333	0.00104335	0.000189	0.000201841	0.000277511	0.000126076	0.000297215	0.000441338	0.000371282	-0.00025751	1.90285e-05	0.000272425	-8.19693e-05
FL-CAL-14-5-m-LV-#117	-0.0106012	0.00495868	0.0031938	-0.0121674	-0.00279508	0.00495977	-0.00428009	-0.00175405	-0.00341188	0.00105476	0.000638344	0.000499023	-0.000366362	0.000153243	-0.00354167	-0.000815416	-0.00092025	0.00356529	0.00254788	-0.000910332	-2.13372e-05	-0.00114744	-0.000341539	0.000415407	0.00254446	-0.000733544	-3.83304e-05	-0.000210609	0.000835066	0.000551166	0.000286967	-0.00035785	-0.000539895	-2.2047e-05	-0.00013868	-0.000676792	7.0195e-05	-0.000352005	-0.000536457	0.000182698	-7.62116e-05	7.31232e-05	-0.000206776	0.000179533	0.000575497	5.08204e-05	-9.30346e-05	0.000203259	-0.000164593
FL-CAL-14-5-m-LV-#116	-0.0089173	-0.00779163	-0.00341278	-0.00596931	0.00294993	0.00536572	-0.00578205	0.000216097	0.00464399	-0.00067553	-0.000231426	-0.000491738	0.00274998	0.000105166	0.000681367	0.000627812	-0.00142179	0.0017189	-6.00085e-05	0.00076583	-0.00102416	0.000666928	-0.000114795	-0.000944372	-0.00104095	-0.00099289	-0.000966902	-0.000373081	-0.00104878	-0.000587221	-0.000608067	-0.000756337	-0.00130287	-0.000693548	0.000251958	0.000162135	-6.7336e-05	-0.000120033	-0.000428171	-0.000309453	-0.000400414	0.000269945	0.000309111	-7.67031e-05	0.000423553	-1.92385e-05	7.8544e-05	-3.00752e-05	0.000216865
FL-CAL-14-5-m-LV-#113	-0.00300832	-0.00496882	0.00316692	-0.00168599	-0.00677843	0.00554541	-0.00584299	-0.000787677	-0.000852072	-0.0103051	-0.000229024	-0.00813119	-0.00388172	0.00196046	0.00163623	0.000856003	0.00228972	-0.00131149	0.00163513	0.000259414	-0.000668733	0.000470173	0.00175114	0.00122094	-0.00113168	0.000972445	-0.000478203	0.000314771	-0.000714586	0.000938335	0.000232802	0.000122534	0.000417712	3.73207e-06	-0.000992114	5.21208e-05	0.000579976	-0.000340202	-0.00032267	-0.000244749	-4.02724e-05	-2.35766e-05	0.000137707	8.03871e-06	0.000276056	2.25175e-05	1.39877e-05	-0.000155304	-0.00013805
FL-CAL-14-4-m-LV-#107	-0.00761808	-0.00394093	0.00845579	0.00537885	0.00817116	0.00584188	-0.00366082	-0.00169834	0.00766841	-0.00225136	0.00296762	0.00157634	0.00482446	0.00782544	0.000145531	0.00459797	0.00269604	-0.000539356	-0.000743731	-0.0013082	-4.11679e-05	-7.26856e-05	0.000410974	-4.34325e-05	0.000417506	0.000778514	0.000268138	0.000251252	0.000430152	-0.000287467	-0.00104122	-6.30343e-05	-0.000151993	9.73295e-05	-0.000356282	0.000443109	-0.000187914	0.000390552	-0.00011183	-0.000171231	0.000142247	0.000111559	-0.000406303	-0.00023758	2.24791e-05	-9.33675e-05	-3.21266e-05	0.000279281	4.30628e-05
FL-CAL-4_#21_m_LV	-0.0136034	0.00578385	0.00934693	-0.0111423	-0.00210396	-0.00939863	0.00450792	0.00590148	-0.00422608	-0.00560154	9.16322e-05	-0.0017634	0.000405131	0.000939438	-0.000188366	0.00126721	0.00190357	-0.000450501	0.00109207	-0.000449531	0.000744563	0.00171049	-0.000205531	1.69252e-05	0.000171256	-0.00015127	-0.000548332	0.000364444	0.00160535	0.000481134	-0.000586841	-0.000119296	1.5221e-05	-0.000731994	0.00116951	-0.000249215	0.000400923	-0.000153391	0.000272342	-0.000564085	0.000363311	-0.000148213	0.00016161	8.42695e-05	-0.000186962	0.000402544	0.000151084	0.000187195	0.00014012
FL-CAL-14-1-m-LV-#68	-0.0192673	0.000380407	-9.1279e-05	-0.00377063	0.00182786	-0.00653345	-0.00430321	0.00113957	-0.00259062	-0.000470655	-0.00133379	0.000487722	0.00276215	-0.000626038	0.00171616	0.00139119	-0.0015835	0.00117054	-0.00211205	0.000417326	-0.000852599	0.000178516	0.00117147	-0.00048758	0.00107926	0.000717092	-0.000257074	0.00022412	-9.76071e-05	0.000932427	-0.000476459	-1.78911e-05	-0.000359212	7.85718e-05	0.000153787	0.000149385	0.000554876	0.00043243	-0.000275073	0.000162223	-9.24135e-05	-0.000270799	-0.000422013	0.000304543	-0.000291138	-0.000573181	0.000166169	-1.33166e-05	-0.000158288
BR-ITA-4-15-m-LV-#284a	0.0208292	0.0337854	-0.000676491	-0.00163084	0.000354242	0.00246177	0.0179373	-0.0088356	-0.00366386	0.00602036	-0.00665099	-0.00650979	-0.000891832	-0.00337861	-0.00173251	0.000457029	0.00165011	0.000371738	-0.000885478	-0.000930656	-0.000800141	0.000408646	0.000186541	-5.12936e-05	-0.000875171	0.000262956	-0.000478165	-0.00056317	0.000392671	0.00026818	-0.000759681	-0.000344145	0.000215986	-0.000523929	3.10668e-05	0.000286059	0.000139517	0.00010318	-5.74935e-05	-7.72434e-05	-0.000104608	0.000460127	-0.000323214	-0.000141033	0.000167285	-0.000201934	-9.0701e-06	-1.33343e-05	4.70452e-05
BR-ITA-4-15-m-LV-#9-302	0.0115269	0.00803468	0.0205439	0.00896795	-0.00321664	-0.0129039	-0.00389977	-0.00831854	0.000938618	0.00956987	-0.000237865	-0.00265981	-0.00101754	0.00327678	-0.00369016	0.00384438	0.0011694	-0.000782154	0.00220211	0.00212416	0.000378447	-0.000707281	-0.000758304	-0.00123078	7.3036e-05	0.000675371	4.60678e-05	-0.0005099	-0.00047833	7.05073e-05	0.000159826	0.000624905	2.24723e-05	0.000151171	6.95403e-05	-1.58834e-05	0.000164725	-0.000146478	6.59229e-05	0.000242143	-2.8247e-05	-0.000567066	0.000205231	0.0002862	0.000152339	-5.62393e-05	0.000188865	5.81043e-05	0.00025745
BR-ITA-4-15-m-LV-#11-#306	0.0201955	-0.0154269	-0.013941	-0.0176694	-0.00955582	-0.00305316	0.00174741	-0.00200925	-0.000800745	0.00300571	-0.00189211	0.000974655	0.00141947	0.00277872	-0.00568619	-0.0043148	9.99272e-05	-0.00125223	2.82918e-05	0.000214981	0.000571344	-0.000781054	0.00124973	5.86382e-05	-0.00101005	-0.000757394	-0.000478843	0.000565779	4.40652e-05	-8.72627e-05	0.000633687	-3.59453e-05	-0.00065024	-0.000355213	-0.00013432	0.000706184	0.000136877	0.000630324	-0.000311333	-0.000453539	1.00839e-05	-0.000501725	-0.000153876	3.06263e-05	-0.000251779	1.52593e-05	-4.96443e-05	-8.96774e-05	-6.23548e-05
BR-ITA-4-15-m-LV-#18-#320	0.0149866	-0.025123	-0.0123656	-0.0145452	0.0103369	-0.000561759	-0.0126419	3.7421e-05	-0.00237403	0.00649495	0.000516976	0.00180197	-0.00164701	-0.00274869	0.00176843	0.00253322	0.000936487	-0.000561074	-0.000731585	-0.000618191	-0.00144376	-0.00126086	-0.000578717	0.000250944	-0.00154878	0.000466884	-0.00152306	0.000665485	0.00028878	-0.00112331	-0.000337476	-3.41999e-05	0.000485674	-0.000262602	1.25266e-05	-0.000883213	0.000365583	-5.45174e-05	0.000123632	6.93545e-05	5.42275e-05	-0.000226339	-6.58303e-05	3.1652e-05	-5.56952e-05	3.87326e-06	-9.9149e-05	0.000236077	-0.000153389
BR-ITA-4-15-m-LV-#19-#322	0.0175254	-0.0158185	-0.0139584	-0.0125114	0.000357753	0.00120072	0.000137896	-0.00140096	-0.000437968	-0.000964548	-0.000681832	0.00322578	-0.00364435	0.000656325	-0.00364571	0.00107796	0.000524994	-0.000361682	0.00165089	-0.00121	-0.00116941	0.000548659	0.00144432	-0.00207333	0.000696176	-0.000221492	-0.000359708	-0.000331639	0.000765443	0.000192152	-0.000528294	0.000475975	0.000177845	0.000989231	-0.000562928	0.000100933	-0.000442197	-0.000529109	0.00024609	-9.31915e-05	-0.000226014	0.000543749	0.000413999	-0.000121963	-0.000273461	-0.000106583	0.000210088	8.94039e-05	-4.45165e-05
BR-ITA-4-15-m-LV-#20-#325	0.0130546	-0.0148064	-0.0147596	-0.00636975	0.00272842	-0.00688419	0.00722731	0.00202017	0.00932271	0.00169761	0.00187149	0.00155493	-0.00522904	0.00201662	0.0013242	-0.00297665	0.00225686	0.00150206	-0.00122446	0.0024513	0.000191451	0.00334058	-0.000730128	0.00198519	0.000764434	0.000360068	0.00040632	-0.000215675	0.000275753	-0.00059284	0.00041335	0.000698017	0.000104992	-6.14525e-05	0.000133977	-6.21889e-05	-0.00014767	0.000116416	-0.000173798	-1.23396e-05	-0.000125543	-1.2459e-05	-0.000202826	5.82373e-06	0.000325215	-0.000183368	0.000241417	0.000144542	7.25132e-06
BR-PTO-4-15-m-LV-#350	0.0185745	-0.0145001	-0.00377644	0.0046324	0.00112208	-0.0129198	-0.00619899	0.0055024	0.000692826	-0.00315989	-0.00559294	-0.00049441	-7.54069e-05	0.000606463	0.000961871	-0.000142657	0.00199781	0.00402756	0.0040286	0.00233227	0.00123722	4.57795e-05	-0.000745159	-0.000262743	-0.00073699	-0.00110241	0.000209975	-8.31851e-06	-0.000549764	0.000531728	-0.000317243	-0.000856514	-0.000145093	0.000211251	4.29544e-06	9.68972e-05	-0.000200397	0.000109781	0.000363629	0.000279799	0.000472753	0.00022687	-0.000177716	-0.000303514	-0.000199017	-0.000142818	-0.000212787	-9.63898e-05	8.45905e-05
[truncated: 4 more columns]

## Sheet: RWs_Males_RV
Supplementary Table 2. Relative warp scores from the four Relative Warps Analyses.
Specimens	rw1	rw2	rw3	rw4	rw5	rw6	rw7	rw8	rw9	rw10	rw11	rw12	rw13	rw14	rw15	rw16	rw17	rw18	rw19	rw20	rw21	rw22	rw23	rw24	rw25	rw26	rw27	rw28	rw29	rw30	rw31	rw32	rw33	rw34	rw35	rw36	rw37	rw38	rw39	rw40	rw41	rw42	rw43	rw44
#438-FL-CAL-14-3-m-RV	-0.0118138	0.012533	-0.00507724	-0.01089	-0.00193617	0.00201474	-0.0133245	0.00777282	-0.00385295	0.00115146	-0.000599346	0.0053106	-0.00185319	0.0048043	-0.000340706	0.000285808	-2.56882e-05	0.000113918	-0.000428218	0.000194022	-0.000341867	0.0024176	-0.000213504	0.000456045	-0.000963372	0.000741463	-0.000335696	0.000843989	-0.000377434	6.50177e-05	-0.000279348	0.000269922	-6.22995e-06	-4.86219e-05	0.000497928	-7.00615e-05	-0.000290929	-0.000544626	0.000231913	0.000150175	0.000170299	-2.0172e-05	0.000157671	3.23835e-05
#440-FL-CAL-14-3-m-RV	-0.0242014	-0.00798213	0.0173996	0.00678303	-0.00382707	0.00707946	0.00928045	-0.0021045	0.00191603	0.0056608	0.00112661	-0.00495694	0.00197071	0.00242403	-0.00111531	-0.00102227	4.60194e-05	2.3619e-05	0.000480065	-0.00143008	-0.00118553	0.000132446	-0.00162984	0.000121947	-0.00119028	0.000841415	4.53348e-05	0.000179195	-0.000462737	-0.000776192	-0.00011681	0.0003449	-0.000143789	0.000713714	0.000584629	9.28935e-05	1.26985e-05	0.00031502	3.82222e-05	-1.55683e-05	0.000128548	-0.000190984	5.03633e-06	-0.000103714
#449-FL-CAL-14-3-m-RV	-0.00658639	-0.00394677	-0.0110416	0.0172312	0.0160672	-0.000112669	-0.00154911	0.00588069	0.00431051	-0.000497632	0.00162939	-0.00139571	0.000440307	0.00335245	-0.00107156	0.0025236	0.00403642	0.00147527	-0.00173373	-0.00093543	-0.000547645	-0.00101653	-0.00128982	-5.65646e-05	0.000722572	0.000549092	-0.00135314	-0.00017009	0.000236073	-0.000371245	0.00011316	-0.000714447	0.000159963	-0.000159825	-8.98299e-06	-4.72611e-05	0.000119431	-3.57403e-05	0.000206737	0.000110143	-2.08388e-05	0.000265856	-0.000105237	0.000167663
#450-FL-CAL-14-3-m-RV	-0.0170383	0.0116689	0.0115929	0.0111926	-0.00937619	0.00220752	0.00160847	0.00735273	-0.00117541	0.00489005	-0.00313274	-0.000521627	-0.00569914	-0.00391918	0.00527706	0.00258667	0.000762141	0.000231968	0.000915701	-0.00128691	-0.00198248	-0.00125493	0.00188758	-0.00115404	-2.85811e-05	1.78484e-05	-0.000221977	-3.65434e-05	0.000106742	-1.10931e-05	-2.76986e-05	-8.81997e-05	0.000240867	-0.000489889	4.72832e-05	-0.000133838	-7.3244e-05	5.13164e-05	5.4491e-05	0.000174932	-6.56961e-05	-0.000163008	5.59046e-05	3.05668e-05
#455-FL-CAL-14-3-m-RV	-0.00102124	-0.00371883	-0.00192759	0.00185949	-0.00469396	0.0140954	-0.00360273	-0.00160103	0.00647174	-0.00323892	0.0026551	-0.000560327	0.00288869	-0.00124068	0.00192057	0.00380514	-0.00196781	-0.000742303	-6.69024e-05	0.00163273	-0.000712552	0.000368724	6.31202e-05	0.00135312	-0.000408668	8.87584e-06	-2.42246e-05	0.000513501	0.000729368	-0.000373642	-0.000477572	1.96458e-05	-0.000465396	-2.5135e-05	-0.000560469	0.000394767	-6.88717e-05	-0.00021362	-6.45956e-05	5.49992e-05	0.000105375	-0.000387434	-0.000136244	0.000286254
#469-FL-CAL-14-3-m-RV	-0.0219232	0.00217254	-0.0115245	-0.000342508	0.00674265	-0.0105625	0.00655741	0.0114825	-0.00072841	-0.00248232	0.00314331	-0.000389394	-0.00171309	-0.00343129	-0.000841512	0.00161942	-0.00111745	6.73773e-05	0.00225916	0.00223753	0.000769235	3.33594e-05	7.7088e-05	0.000793076	-3.48607e-05	0.00077737	9.57541e-05	-0.00148104	-0.00052403	-7.07863e-05	-0.000205077	0.000780617	0.000288651	0.000166264	1.45765e-05	0.000401116	0.000147948	-5.71365e-06	0.000130681	-8.25153e-05	0.0002566	1.59994e-05	-9.406e-05	-4.99792e-05
FL-CAL-14-3-m-RV-#81	-0.00780627	0.00984708	-0.00893827	-0.00317617	0.00963654	0.00464698	-0.0024291	-0.00559671	-0.00163934	0.00590007	-0.00155715	0.000975475	-0.000359338	-0.000297529	-0.00312636	0.0031642	0.000570442	-0.00113859	-0.00113671	0.000500512	0.000495549	-0.00190571	-0.000490948	0.000123719	-0.000278519	-0.000387223	0.000594776	0.000152264	-0.000257018	0.00016917	-0.000446019	-6.21641e-06	0.000414588	0.00028553	-0.000415502	-6.89777e-05	0.000626875	-3.79091e-05	-0.000405968	0.00029767	0.000117185	-9.00037e-05	0.000440666	-0.000153948
FL-CAL-3_#56_m_RV	-0.00576299	-0.0158821	-0.00199305	0.0161402	-0.00507538	0.000683249	-0.0135903	0.00288452	-0.00210275	-0.00239054	0.00301456	-0.000544889	-0.000593426	-0.00263393	-0.000479862	-0.00395527	-0.00317445	-0.00216619	-0.00118637	-0.000613898	-0.00077593	-0.00177527	-0.00140706	-0.00126	0.000611603	0.0011662	0.000189728	0.000507334	-0.00042503	0.000284963	0.000264819	0.000408509	0.000152911	-0.000164723	-0.000253066	0.000131387	-0.000104822	-0.00013352	-0.000248384	0.000220551	9.5762e-06	0.000139904	2.13018e-05	3.54407e-05
FL-CAL-4_#21_m_RV	-0.00678859	0.0136506	0.00371194	0.0135673	0.0137715	0.0119755	-0.0070311	-0.00482263	-0.0020698	-0.00149046	-0.00268972	-9.92743e-05	0.00239975	-0.00183795	0.000144318	-0.00116116	0.00187077	0.000894263	-0.000459937	-0.000167919	0.00107982	-0.000388453	0.00161833	2.06569e-06	-0.000461019	0.00020963	6.262e-05	0.000311431	-0.000171928	0.000983125	-0.000680744	0.000645268	-4.37897e-05	0.00018563	-1.067e-05	-0.000201605	-5.52021e-05	0.000109826	3.92109e-06	-0.000298349	0.000173871	0.000138736	-0.000513012	-0.000130412
FL-CAL-14-4-m-RV-#110	-0.00731981	0.0130932	-0.010109	-0.000952201	0.00432673	-0.0110628	-0.00936585	-3.80367e-05	0.00833694	-0.000228739	0.00160446	-0.00197601	-0.000752171	0.000113969	0.00117393	-0.000578695	-0.00077568	0.000531857	-0.000395036	-0.00150588	-0.000407945	8.93569e-05	0.00112423	0.000167413	0.000362253	8.43437e-05	-0.000227512	0.000392803	-0.000145993	-0.000164365	0.000863502	0.000396907	-0.000417549	0.000361191	-0.000123376	-0.000392871	9.82474e-05	6.70035e-05	-0.000226537	-0.00070954	-3.06541e-05	-0.000213711	0.000279807	-2.79926e-05
FL-CAL-14-4-m-RV-#108	-0.0135643	0.00667181	-0.00412549	-0.00226313	0.00639927	-0.00413795	0.00227336	-0.00680512	-0.00191392	-0.0033145	-5.91936e-05	-0.000312926	-0.00199093	-0.00100082	-0.00486846	-0.000593493	-0.0017682	-0.00027123	-0.000514905	-0.00164315	0.000420624	0.000733679	0.00139578	-0.000325943	0.00118569	8.79511e-06	-0.000691494	0.0005384	0.000812962	-0.000256337	0.000206556	-0.000478356	0.000232073	-0.000354468	0.000351357	0.000590578	-0.000167546	0.000192624	1.53995e-06	0.000221899	0.000141426	-0.000462808	-0.000153359	-0.000219591
FL-CAL-14-4-m-RV-#101	-0.00301538	0.00501404	-0.00683798	-0.00444431	0.00124892	-0.0010357	8.98437e-05	0.00565191	0.00147171	0.00404872	0.00161183	0.000287491	-0.000330923	0.00132473	-0.00107198	-0.00170566	0.00275537	0.00119071	-0.00150747	-4.16173e-05	0.00063534	-0.00168403	-0.000876755	-0.000302714	-0.000470929	-0.000808438	0.00159786	-0.000501014	0.0006923	0.000238479	0.000498372	0.00030655	-0.000428548	-7.97226e-05	-0.000335907	0.000230866	-0.000904358	9.7609e-05	0.000232599	0.000144258	-1.46274e-05	-0.000209578	-4.09079e-05	-4.46319e-05
FL-CAL-14-5-m-RV-#112	0.0136344	0.00653914	0.00408195	-0.0121871	-0.00662753	0.00255616	-0.00563237	0.00963312	0.000390058	-0.00355513	-0.00310603	-0.00146647	0.00423422	-0.00607451	-0.00366226	-0.00148615	0.00230169	-0.00166048	0.000440631	-0.000796529	-0.00203591	0.000502486	-0.000483096	-0.000337073	-0.000237422	-0.000626944	-9.73651e-05	-9.581e-05	-0.00054768	0.000122768	0.00010901	-0.000873471	-8.41954e-05	0.000364958	-0.000174063	1.30548e-05	0.000214874	6.22885e-05	0.00045379	-6.00785e-05	0.000167283	-6.28421e-05	5.32896e-05	2.15801e-05
FL-LX-3_#37_m_RV	0.0156868	-0.014225	-0.00308174	-0.00808071	-0.00858764	0.00150926	-0.00783761	-0.00495037	0.00447572	-0.000650078	-0.000664448	-0.00282446	-0.00644238	-0.00240055	-0.000791842	0.00196356	-0.00170719	0.00405483	-0.00109595	0.00115283	0.000867664	0.000745038	-0.0007338	-0.00155107	-0.000222287	0.000475774	0.000429121	-5.90317e-05	0.000632787	0.000234957	-0.000327886	-0.000152762	0.000186092	0.000377996	0.000202459	-0.000362363	0.00012034	0.000165386	0.000394017	3.0041e-05	0.000127205	0.000103642	-1.60855e-05	-0.000102673
MX-SiNo-1a-14-m-RV-#202	0.0175061	0.00712969	0.00661516	0.000608875	-0.00219999	-0.00258895	-0.00252423	-0.00389576	-0.00238258	0.0039246	0.00350952	0.000476846	-0.000418713	-0.00153338	-0.000244982	0.00076745	-0.000749175	0.0011587	0.000231798	-0.00328989	0.000283932	0.000445787	-0.00150934	0.00269333	0.000777271	0.000538465	0.00128517	-0.000511138	-0.000304393	0.000182505	0.00010327	-0.000313468	-3.22954e-06	-0.0006421	0.000165041	-0.000250986	0.000400219	-0.000251162	8.24686e-05	-6.45939e-05	-9.27501e-06	-9.86211e-05	-0.000240323	0.000107255
MX-Sil-1-14-m-RV-#278	-0.0141623	0.0121713	8.16594e-05	0.00779964	-0.000976012	0.000106125	-0.00263754	-0.0047787	0.00333145	0.000599665	-0.00168504	-0.00106481	0.0019084	-0.000387999	-0.00017208	-0.00332262	-0.00057027	0.00340303	0.00274093	-0.00012138	0.00109898	0.00156106	0.000629315	0.0002964	-0.000713593	-0.000164585	0.000210685	0.000142869	2.23746e-05	-4.14246e-05	0.000356569	-9.26711e-05	-6.60555e-05	-0.000371331	-0.000266584	0.000520946	0.000196686	0.000347306	-1.47491e-05	0.000379356	3.55003e-05	0.000395844	0.000281795	0.000271743
MX-Pul-1-1a-m-RV-#165	-0.0302816	0.00612649	0.00126934	0.000400089	-0.00808132	0.00148727	0.00118438	0.00129255	-0.00553737	-0.00230187	-0.00195416	0.00147814	-0.00223817	0.000221402	-0.00168444	-0.000804945	-0.000718996	0.00135243	-1.86005e-05	8.22893e-05	0.00157762	3.69037e-05	-0.000394999	0.000103085	0.00110826	-0.000427165	-4.45719e-05	-5.63265e-06	-0.000207072	-0.000667572	-0.000196133	-0.000129498	-0.000123003	0.000936384	-0.000394549	-0.000306125	6.28131e-05	-0.000115855	2.11154e-05	3.0723e-05	-0.000679819	-9.51513e-05	-0.000186326	0.000228124
MX-Pul-1-14-m-RV-#155	-0.0192597	-0.000261605	-0.000859734	0.00146282	-0.00208017	0.00650214	-0.00369841	0.00163343	0.00410684	-0.00145219	-0.00135816	0.00372131	0.000531818	-0.00116565	0.00165081	-0.00191341	-0.000570828	0.000613123	-0.000650326	0.00200793	-0.000268419	-0.000651414	-0.00107247	0.000730878	-0.000133174	-0.000229106	2.92663e-05	-0.00080228	0.000114597	6.78032e-05	-0.000349932	-0.00096576	-0.000586886	-0.00042129	0.000687084	0.000290893	0.000151445	-4.96323e-05	-0.000303214	-0.000213974	-0.000359999	6.65137e-05	7.82655e-05	-0.000391664
MX-Pul-1-14-m-RV-#152	-0.0334674	-0.00058638	0.00330961	-0.000395862	-0.00413657	0.00796726	0.0102161	-0.00611856	-0.00263703	-0.00330303	-0.000428372	0.00128981	0.000775586	-0.00241467	0.00212643	0.000774807	0.0012062	-0.00112223	-0.00140612	0.000514327	0.00111773	0.00153595	-0.00194436	-0.000362148	0.000543006	-0.000490954	9.85187e-05	4.62995e-05	0.000518547	0.000123863	0.00124521	5.62721e-05	0.00050522	-0.000198305	-2.70647e-05	-0.000294314	-9.37584e-05	-0.000268571	3.3694e-05	-0.000298289	0.000364095	0.000160893	0.00014464	2.97196e-05
MX-Pul-1-14-m-RV-#150	0.011441	0.00158471	0.0113568	0.0031575	0.00705121	-0.00505791	0.00783498	0.00642468	0.0039991	-0.00555924	0.00102991	0.00271531	0.00310313	-0.00141513	0.000412642	0.00127805	0.000588288	-0.000147926	0.000118982	-0.00219504	0.00190734	0.00150038	-0.00123192	-0.00185337	0.000470687	-2.03658e-05	0.00049295	0.000485227	9.68357e-05	-0.000173959	-0.00137045	0.000526776	-9.49136e-05	-0.000345044	2.67227e-05	-0.000187646	-0.000107666	0.00011227	-0.000138972	4.05628e-05	-0.000174342	-4.25037e-05	0.000255342	-5.01761e-05
MX-LG-1_#11_m_RV	0.0184927	-0.00467053	0.00923032	-2.64522e-06	-0.00518154	-0.00218583	0.00347647	0.00567335	0.00471161	0.00371152	-0.000726516	0.00285879	0.00109264	-0.00283438	-0.00355111	-0.000241459	-0.000366792	0.000294708	-0.000490976	0.000407788	0.00134632	-0.000413042	9.20004e-05	0.00098405	-0.00198933	-0.000153438	-0.00108275	0.000443726	0.000583218	5.1654e-05	0.000757657	0.000582647	0.000887099	-0.000199447	3.60357e-05	-0.000130237	4.47273e-05	-0.000190473	-0.000211238	-1.98011e-05	-0.00035575	-1.46701e-06	-0.000158282	-2.97637e-05
MX-LG-1-14-m-RV-#269	0.0166882	0.0163539	0.00898879	-0.00500331	-0.00800045	-0.00645096	0.00872184	-0.000981255	0.0036988	0.00298267	-0.000963421	0.00511312	-0.00151012	0.00039183	0.00108657	-0.00169208	-0.00166476	-3.15645e-05	-0.000966296	0.000670455	-0.000108779	-0.00218201	-0.00117686	0.000449073	0.00150317	-0.000504699	-0.00094433	0.00045633	0.000149208	0.000313689	-0.000371911	0.000277307	-0.000478709	0.00044446	0.000177899	0.000200231	7.55681e-05	8.94911e-05	6.8753e-05	6.6352e-05	0.000433139	0.000201151	-8.79246e-05	0.000138436
MX-LG-1-14-m-RV-#268	0.0134733	0.00672654	0.00542395	-0.00308193	-0.00664686	0.00418542	0.00604051	-0.00500024	0.0016976	0.00230127	-0.00178085	0.00217565	0.00191373	0.000783617	-0.00209731	0.00295083	-0.000499592	-0.00133378	0.000667548	0.000526815	0.00127863	-0.000305404	0.00122727	-0.000729776	0.000532361	0.0024454	-1.70926e-05	-0.000287938	-0.000703014	5.51703e-06	0.000577658	-0.000476974	-0.000485056	-6.99039e-05	-0.000427076	8.04924e-05	-0.000453669	-1.89208e-05	0.000166321	-0.0001039	-0.000151326	0.000203245	7.39473e-05	-0.000137735
MX-LG-1-14-m-RV-#265	-0.0166802	-0.0102737	0.015664	0.00585502	0.00689039	-0.0202063	-0.000598756	-0.00446884	-0.0033344	0.00385476	0.0017949	-0.000369249	0.00540657	-0.00134994	-0.000289329	0.00177115	-0.00133905	0.00077627	-0.00165187	0.00151806	-0.00115889	0.000381974	0.00113956	-0.00042823	-0.000369144	-0.000262891	0.000236012	7.43351e-05	0.000142891	0.00100833	-0.000289472	-0.000687916	-4.64464e-05	0.00028722	0.000205693	4.25382e-05	-0.000249712	-0.000264511	3.14508e-05	-6.30702e-05	-7.22339e-05	2.62345e-05	7.59773e-05	0.000198287
MX-CG-1-14-m-RV-#225	0.0143333	-0.00586398	0.0177477	0.00966065	0.0107689	-0.00204405	-0.00358767	9.59628e-05	-0.000770918	-0.00397668	-0.000437598	0.00252884	0.00171872	0.00304287	0.00330815	-0.000301577	-0.00062706	0.00130073	0.00197733	0.000936059	-0.00110531	-0.00019114	-0.000136059	0.00120287	0.000808885	-0.000224732	0.000135668	0.000264916	0.000190459	-6.67212e-05	0.000621171	0.000127953	0.000470044	0.0004071	-0.000459311	-5.53899e-05	0.000106834	-5.15733e-05	0.000471989	0.000246193	-4.67447e-05	-0.00014457	0.000108449	-0.000429543
MX-CA-1_#32_m_RV	0.00805881	-0.00696403	-0.00452025	0.00285652	0.00218976	0.00231399	0.00155167	-0.00221833	0.000421644	0.00388596	-0.00475885	-0.00489602	-3.49167e-05	0.00178158	0.000317021	-0.00134683	-0.00303793	0.000766996	0.000175478	-0.000638132	0.000982462	0.000320682	-0.000895285	-7.5046e-05	0.000136717	-0.0012037	-0.00116785	-0.000851637	-0.0011175	0.000128373	-0.000659046	-5.23394e-05	0.000256446	-0.000469131	-0.00046199	1.54286e-05	-0.000438595	-0.0004476	0.00013983	-0.000214708	9.16576e-05	-0.000164091	8.84195e-05	-5.05123e-05
MX-CA-1-14-m-RV-#249	0.00222602	-0.00881418	-0.00364944	-0.0132369	0.00292976	-0.000961123	-0.00224298	0.00106869	-0.00428767	0.00243605	-0.000570592	-0.00217058	0.00266526	0.00120538	0.0026463	0.000695472	0.00100867	-0.000209643	0.00148145	0.000716777	0.00230152	-0.000623427	-0.000920032	-0.00179484	2.99913e-05	3.88935e-05	-0.000617331	0.000414459	-0.000104261	0.000800729	0.000717403	0.000381314	-0.000801404	-0.000336509	0.000240301	0.000226056	0.000687542	4.37385e-05	0.000191988	7.78918e-05	-0.000157515	-0.000323723	-0.000113664	6.37781e-05
MX-CA-1-14-m-RV-#248	0.0146063	0.00132452	0.00464339	-0.00044521	0.0139334	-0.0066194	8.45995e-05	-0.00654778	0.00429363	-0.00335886	-0.00512061	-0.00195604	-0.00360381	-0.000629746	0.000673536	-0.00191876	0.00232639	-0.00185139	0.00241845	0.00176868	0.000341139	-0.000432896	-0.000525129	-0.000230895	-0.000323077	0.000464301	0.000552377	-0.000106823	-0.000180276	-0.000509406	0.000193045	-0.000352391	-1.78535e-05	0.000146615	0.000413337	-0.000350205	-0.000228981	-0.000515302	-0.000391399	0.000263697	9.08929e-05	-0.000168992	-0.000118142	0.000208436
MX-CA-1-14-m-RV-#239	0.0104244	-0.0192806	0.0034006	-0.00618224	0.0126946	0.0081393	0.00283482	0.00478612	-0.00225161	-0.00217289	-0.00572685	0.00068836	-0.00430769	0.00153628	-0.000824673	0.00110138	-0.000663306	-0.000481316	0.000565115	-0.00146188	-0.000684822	-0.00046644	0.000252753	0.00119993	0.000374077	8.75317e-05	0.000545869	0.000223778	0.000315928	0.00082319	0.000121555	0.000132556	0.000169418	0.00021435	0.000250894	0.000652535	-0.000110309	0.000272215	-7.73781e-05	-0.000425251	-0.000147488	0.000110893	0.000223481	0.000269997
MX-BC-1_#11_m_RV	0.00675203	-0.00175266	0.00877632	-0.00834452	0.00377786	-0.00226101	0.000351505	-0.00365538	0.00191849	0.00199802	0.000813965	-0.00233603	-0.00367142	-0.000469054	0.000928564	1.73401e-05	0.00196004	-0.00139925	-0.00281442	-0.000454243	-0.0014018	0.00236134	0.000858462	-0.000540983	0.000248699	-0.000577575	0.000179783	-0.000237777	-0.000288798	-0.000531539	0.000107367	0.000692474	-0.000343603	9.34066e-05	-0.000281807	0.000772513	0.000320886	-0.000474106	-4.43396e-05	0.000105866	-0.00021218	0.000343095	-0.00017463	-0.000158311
MX-BC-1a-14-m-RV-#197	-0.0131182	-0.00881263	0.0119226	-0.0116637	0.00572324	-0.00123857	0.00585727	0.00161441	-0.00145147	-0.00318474	-0.00110988	0.00211128	-0.00213355	0.00320184	-0.00323088	-0.000868341	-0.0011017	0.00108713	-0.000699751	0.00108121	-0.00272859	0.000145795	0.000333114	-0.000262728	-0.000620583	4.67262e-05	-4.47874e-05	-0.000290835	-0.000129817	-4.52271e-05	5.8886e-05	0.000186278	-0.000640236	-0.000828118	-0.000586654	-0.000732784	0.000261402	0.0003534	-0.000214279	3.96697e-06	0.000163778	-2.05605e-05	-0.000135007	4.31432e-05
MX-BC-1a-14-m-RV-#196	-0.00542233	-0.0172348	-0.00726831	-0.028918	0.00952111	-0.000188249	-0.0044209	-0.000720925	-0.00327421	0.00297804	0.000740106	0.00188879	0.00330441	-0.00372533	0.00339962	0.000534244	-0.000268334	0.00127926	0.00097535	-0.00168243	0.000324295	-0.000967993	0.000514064	0.000546034	7.57583e-05	-0.000115452	-0.00036715	0.000354436	-0.000125618	-0.0012485	-6.99984e-05	-0.000179134	9.58043e-06	0.000125648	-2.62122e-05	-0.000161051	-0.000402675	0.000183655	-0.000263906	0.00010801	0.000123599	0.000278523	-0.000111526	-7.72366e-05
MX-BC-1a-14-m-RV-#182	0.0101448	0.000432251	0.0113399	-0.00771789	-0.00259826	0.00054576	-0.00772035	-0.00859749	-0.00332936	0.000964875	0.00466451	0.000624647	-0.00123002	-0.000332491	0.000815019	-0.00275075	0.00382102	-0.00102944	-0.000836574	0.00209074	0.000261251	-0.000109938	0.000237238	0.000459223	0.000379859	0.000609441	-0.000732884	-0.000680785	0.000107071	-0.000445329	-0.000675844	0.000262043	0.000607545	-0.000314475	-5.79808e-05	8.79524e-05	-7.18471e-05	0.000493192	0.000185452	-0.000253441	-0.000129733	-0.000206741	0.000256071	0.000181944
MX-BC-1a-14-m-RV-#180	0.0152833	0.00339899	0.000796498	0.00245826	0.00574925	0.0108488	0.00302845	-0.00201814	-0.0010588	0.000102682	0.0109962	0.00236285	-0.00398641	9.80337e-05	-0.00102338	0.000435874	-0.000174664	6.73919e-05	0.00312603	-0.00043607	-0.000631217	0.000603042	3.36927e-05	-0.00125281	-0.000462726	-0.00114561	-0.00056273	-0.000214342	-0.000464714	0.000761516	0.000287621	-0.000477255	-0.000136542	0.000377051	6.71575e-05	-8.78046e-05	-0.000211884	-3.65858e-05	-0.000264953	2.8717e-06	-5.01233e-05	5.48944e-05	4.92115e-06	1.56403e-06
FL-LX-5-14-m-RV-#38	-0.00730537	-0.0150936	-0.0019122	0.00856196	-0.017259	-0.00924128	-0.00578802	-0.00160701	-0.000748078	-0.00128044	-0.00152809	-0.00108849	-0.00185186	0.00109164	-7.63623e-05	0.00136359	0.00252161	-0.00289827	0.00121388	-0.00154595	0.00135309	0.0010718	8.37783e-05	0.00189518	-0.000252899	-0.00030064	-0.000691541	-0.000539467	0.000630576	0.000787275	-0.000262688	4.99455e-05	-0.000621147	0.000239677	-0.000202713	-0.000262798	-0.000152017	0.000272118	-0.000229058	0.000249735	0.000115029	0.000106338	3.04065e-05	-0.000161944
FL-EG-3b-m-RV-#51a	-0.0162074	-0.00106074	0.00789651	-0.0170772	-0.00870287	0.00298962	-0.000182664	0.00227179	0.00454788	-0.00343109	0.00290236	-0.0023573	0.00197219	0.00558637	0.000206023	-0.00149279	-0.000762077	-0.00153753	0.000703985	-0.00153454	0.00123282	-0.0020983	0.00238122	-0.000650715	-2.33214e-05	-0.000165225	0.000491141	-0.000590113	0.000630569	0.000173232	-0.000356085	-0.000273822	0.00062446	-2.15555e-05	0.00010966	-0.000105807	0.000313952	-0.000435469	0.000142255	-1.17768e-05	8.18633e-05	0.000166473	-3.29655e-05	3.24894e-05
FL-EG-3a-14-m-RV-#50	-0.00427804	0.00351703	-0.00247904	0.00338489	-0.000421479	-0.00325419	-0.00637909	-0.00117965	0.00392144	0.000214902	-0.000261393	1.12925e-05	-0.000130875	0.00234958	0.000197722	0.00285001	-0.00198377	-0.00360523	-0.0002623	0.001362	0.000487398	0.000248121	-0.000222494	5.40963e-06	5.66215e-05	-0.0014183	0.000695992	0.000501767	-0.0011533	-0.000372934	0.000262058	-6.12619e-05	0.000456961	-0.000331464	0.000361934	-0.000125007	-0.000127414	0.000741436	0.00027414	3.06992e-05	-0.000138572	0.000165289	-0.000248538	5.03828e-05
BR-PL-1-15-m-RV-#279a	-0.00256411	0.00301441	-0.0218131	-0.00606903	-0.00924591	-0.0031285	0.00991364	-0.0102366	-0.000643117	-0.00497872	0.000675949	-0.00285687	0.00116689	-0.000830855	-0.000774736	0.000498168	0.00142421	0.000764207	0.0014203	9.56265e-05	-0.00295283	-0.00152352	-0.000337308	0.000805229	-0.000118663	-1.85271e-05	-4.59606e-05	0.000934108	-0.000214874	0.000463416	-0.000381199	0.000690258	4.64363e-05	-0.000318247	0.000232717	-0.000131198	-0.000165933	-0.000229511	0.000286946	4.7424e-05	-0.000350415	0.000147269	8.82512e-05	-7.33273e-05
BR-ITA-4-15-m-RV-#283a	0.0271121	0.0146984	0.00820987	0.00203959	-0.00701636	-0.000690461	0.000782508	0.00390857	-0.00794673	-0.00873008	0.000944108	-0.00603262	0.000660522	0.00145726	0.00119057	0.00194682	-0.000618018	0.00190577	-0.00281296	0.000380814	0.00109258	-0.00117804	0.000335877	0.00059137	-0.000924631	-0.000211272	-0.00014125	-0.000126221	-0.00045712	-0.000427719	0.00041532	-0.000104533	-0.000166096	3.18263e-05	0.000262255	0.000142283	-0.00011645	9.62398e-05	-0.000390544	8.02715e-05	9.55182e-05	5.891e-05	0.000122756	-2.27847e-05
BR-ITA-4-15-m-RV-#285a	0.0137362	-0.0185877	-0.0152662	0.0164148	-0.0104501	0.000431331	0.00232706	-0.00561421	4.41074e-05	-0.0020882	-0.00174547	0.0082038	0.00231134	0.000571903	-9.64888e-06	-8.23848e-05	0.00117201	0.00126489	-0.00108262	-0.00115136	-0.00027816	-0.000235676	0.00193907	-0.000872234	-0.000347432	-0.000467515	0.000328867	-0.000877216	-0.000780897	-0.000575959	0.000254319	0.000322654	-3.99413e-05	0.000167944	0.000341716	8.87571e-05	0.000226737	-7.89728e-05	6.3334e-05	2.56964e-05	0.000174987	-0.000223032	2.99759e-05	0.000120433
BR-ITA-15-m-RV-#11-307	0.0188791	0.00543148	-0.00284154	0.011815	-0.00292791	0.00193661	-0.00638924	0.00176423	-0.00586831	0.00450147	-0.00147369	-0.00172696	0.00309226	0.00115497	-0.00303247	0.00105767	-0.00111487	-0.000678755	0.00255432	0.00115675	-0.00124496	0.000227909	-8.74509e-05	-0.00103523	0.000943698	-0.000553485	0.000204795	-0.000437789	0.00155617	-0.00105886	-3.9018e-05	0.000508902	-0.000261828	-0.00014604	0.0002911	-0.000160047	1.35717e-05	-0.000145876	-9.37871e-05	-0.000276395	3.29133e-05	0.000223699	1.96387e-05	-1.25908e-05
BR-ITA-4-15-m-RV-#18-#321	0.0097289	0.00623178	-0.0139302	0.00654184	0.00167605	-0.00902342	0.00630869	-0.00243525	-0.00478667	-0.000271669	-0.000211532	0.00199288	-0.00233658	0.00136254	0.00291643	-0.00152231	-0.00115062	-0.00184639	0.000140462	-0.000902803	5.18296e-05	-8.01863e-05	-0.0010129	-0.000708134	-0.00241951	0.000441592	0.000205985	0.000459927	0.000711874	-0.000470005	-0.000391641	-0.000829833	9.67567e-05	0.000103655	-0.000528228	0.000250632	0.000242568	9.58068e-05	0.000215095	-0.000358384	1.16314e-05	5.44456e-05	-0.000136697	-4.81343e-05
BR-ITA-4-15-m-RV-#19-#323	0.00913418	-0.0140976	-0.00800051	0.010201	-0.000451022	0.00386138	0.0108174	0.00865802	-0.00121259	0.0041098	0.00267085	-0.002752	-0.00182789	-0.000906462	-0.000334083	-0.00287164	0.00107481	-0.000368694	-0.000671604	0.00204582	0.00163723	0.000642692	0.00228962	0.00123316	0.000835991	-0.000138629	0.000512166	0.001482	-0.000247904	-0.000274344	-0.00022391	-0.000478277	-0.000315525	-0.000163038	4.18602e-05	-0.000326844	0.000152078	-0.000104036	0.000130134	-4.35764e-05	0.000120958	1.98011e-05	0.000121628	-6.38904e-05
BR-ITA-4-15-m-RV-#20-#324	0.00805645	0.00104186	-0.00975418	-0.00570628	-0.0146389	-0.00269837	0.00215146	0.00455534	0.00076359	0.00215845	-0.00119882	-0.000720298	0.0026544	0.00338825	0.00146706	-0.000291468	0.00194769	0.00173735	0.000580121	0.00101108	-0.00140293	0.00165239	-0.000502478	-0.000716303	0.00116555	0.000477869	0.000408919	0.000318101	-0.000222711	0.000597394	-9.8753e-05	-0.000331157	0.000924615	0.000127611	-0.000245578	0.00024417	-4.94733e-06	0.000205069	-0.000727599	-9.05331e-05	5.67894e-05	-0.000127631	-0.00027052	-5.76493e-05
#349-BR-PTO-4-15-m-RV	0.0141901	0.00873584	-0.0165084	-0.00381152	0.0100402	0.00666701	0.00723969	0.00158712	0.000174611	0.00156217	-0.000679144	-0.00143996	0.00280506	-0.000413302	0.002857	-0.00206717	-0.00287554	-0.00183561	-0.00229745	-0.000255716	-0.000987812	0.00172584	0.000580717	0.00028822	0.00012131	0.000585453	-0.000217719	-0.00113768	0.000633577	0.000546196	0.000162696	0.000150044	8.82463e-05	0.000340154	0.000238145	-0.000524866	3.38754e-06	0.000282275	5.80216e-05	0.00043976	-0.000222388	-3.00225e-05	5.58081e-05	7.8584e-05
