# Supplementary material for: Significance of climate and hydrochemistry on shape variation – a case study on Neotropical cytheroidean Ostracoda
Source: Copernicus journal article supplement (doi:10.5194/bg-15-5489-2018), 2018-09-14
Supplement: Supplementary file 4 [file Supplementary_Table_3.xlsx]

## Sheet: PLS_results_Females_LV
Axis	Sing.val.	% covar	Perm.p
1	2.6846	77.545	0.02997
2	0.91566	9.021	0.97902
3	0.82337	7.2941	0.58641
4	0.45211	2.1992	0.96803
5	0.37557	1.5176	0.91009
6	0.31842	1.0909	0.81618
7	0.26641	0.76364	0.64336
8	0.19447	0.40692	0.68432
9	0.084256	0.076382	1
10	0.063438	0.0433	0.99201
11	0.045509	0.022283	0.96803
12	0.035267	0.013382	0.77722
13	0.019259	0.0039906	0.95005
14	0.015165	0.0024744	0.68032
15	0.0022078	5.2445e-05	0.94505

## Sheet: PLS_loadings_Females_LV
	Axis 1	Axis 2	Axis 3	Axis 4	Axis 5	Axis 6	Axis 7	Axis 8	Axis 9	Axis 10	Axis 11	Axis 12	Axis 13	Axis 14	Axis 15
rw1	-0.5637	0.4738	-0.4695	-0.07743	0.04815	-0.01058	0.1464	0.3425	0.1192	-0.1375	0.0389	-0.07298	0.1016	-0.05046	-0.1028
rw2	0.4798	-0.1049	-0.5887	0.1586	-0.2481	-0.03327	0.3603	0.1447	0.1374	0.1201	-0.0007515	0.1668	-0.2133	-0.1207	-0.155
rw3	-0.185	-0.1107	0.03678	-0.5599	-0.001585	-0.01336	0.04651	0.03488	0.1062	0.0777	-0.1328	0.03163	-0.3208	0.3612	-0.2638
rw4	0.1615	-0.06726	-0.1707	0.02893	-0.04051	-0.3403	-0.44	0.2889	-0.09153	-0.18	-0.1424	-0.2455	0.2316	0.1892	-0.1995
rw5	-0.2333	-0.2672	-0.2381	0.2711	0.1247	-0.2096	-0.4087	0.05258	-0.1391	0.2861	-0.05356	-0.02558	-0.2685	0.05052	0.04292
rw6	-0.1937	0.1478	0.03183	0.4104	0.02508	0.08802	0.02951	-0.192	-0.2099	-0.2014	0.06208	0.05442	-0.1898	-0.1567	-0.005256
rw7	-0.1083	-0.3397	0.171	0.1976	-0.2935	-0.1257	0.0229	0.307	-0.0607	-0.1466	0.1684	0.07447	-0.04703	0.1094	-0.277
rw8	0.2451	0.08568	-0.03226	-0.1098	-0.1763	0.5079	-0.297	0.1521	-0.03302	-0.07854	0.3337	-0.2114	0.3081	-0.04522	-0.1476
rw9	0.1222	0.3037	0.1241	0.2568	-0.1872	0.2568	0.05856	0.2428	0.02019	0.07464	-0.1025	-0.2676	-0.3567	0.5679	0.3049
rw10	0.1318	-0.002824	-0.06405	-0.0547	0.2596	-0.0652	0.06148	-0.1108	-0.0279	-0.4093	0.2883	0.3941	0.02717	0.4895	-0.09784
rw11	-0.1668	0.04715	-0.1171	0.3093	-0.0127	0.2774	-0.1665	-0.3044	0.04122	0.06507	0.2143	0.1837	-0.06274	0.1793	-0.3963
rw12	0.06629	-0.05006	0.08194	-0.1347	0.2227	0.3275	0.04703	0.3261	-0.5441	-0.1931	-0.2135	0.06796	-0.3403	-0.2617	-0.2385
rw13	-0.2332	-0.03898	0.044	-0.0398	-0.7016	-0.05705	0.159	-0.2655	-0.2788	-0.1389	-0.1871	-0.0788	0.1073	0.04755	-0.1269
rw14	-0.1035	-0.2121	-0.00678	-0.08736	-0.07719	0.03255	0.2687	0.1805	-0.1645	0.09669	0.1238	0.225	0.2375	0.1034	0.2678
rw15	0.03797	0.2456	0.2753	-0.09229	-0.1372	-0.01055	-0.1242	0.04801	0.2613	0.4238	0.02231	0.1789	-0.1074	-0.1315	-0.4008
rw16	0.05827	0.01603	-0.2599	-0.2179	-0.2307	0.1728	-0.4071	-0.2317	0.1779	-0.3328	-0.3185	0.2474	-0.197	-0.08197	0.2422
rw17	-0.03535	-0.2968	-0.07763	-0.09589	0.101	0.02905	0.1795	-0.2364	0.229	-0.2164	0.258	-0.6286	-0.2746	-0.08732	-0.1099
rw18	-0.2331	-0.3621	0.1841	0.1983	-0.02877	0.2732	-0.02262	0.3244	0.5331	-0.2181	-0.1303	0.1619	0.03525	-0.108	0.08879
rw19	0.06701	-0.06664	-0.03541	0.2119	0.2591	0.1851	0.2131	-0.1561	0.08153	0.01739	-0.624	-0.1218	0.3485	0.1905	-0.3105
rw20	0.1831	0.3225	0.2967	0.1417	-0.02129	-0.3987	0.04877	0.07208	0.1795	-0.3872	-0.0624	0.01674	-0.1352	-0.1423	-0.1248
conduct	0.2949	-0.2086	0.04228	-0.05317	0.2619	-0.1024	0.3807	-0.114	0.1038	-0.258	0.6169	-0.2353	0.1708	-0.2536	0.1451
temp	0.2904	0.2529	0.003582	0.2009	-0.2108	0.5767	0.01708	0.125	-0.5359	-0.3263	0.06832	-0.1058	0.07774	0.006633	-0.05187
pH	0.2901	0.1811	0.2065	0.1787	-0.08406	-0.6449	0.34	-0.0151	-0.4589	0.1326	-0.137	0.07268	-0.08816	0.04262	-0.08841
Na	0.183	-0.1348	-0.453	0.3823	0.2334	0.03485	0.01389	-0.008075	0.06859	0.2217	-0.142	-0.06796	0.2346	-0.2404	-0.5913
K	0.1584	0.02178	-0.3653	0.01722	-0.1196	-0.1425	-0.3151	-0.7692	-0.1184	-0.1672	-0.07708	0.0138	0.07955	0.02344	0.2451
Mg	0.2601	-0.318	0.07422	-0.2087	-0.0842	-0.2446	-0.2807	0.3441	0.0348	-0.4794	-0.4133	-0.0464	0.255	-0.2203	0.02181
Ca	0.3113	-0.01529	0.04722	-0.3488	0.2135	0.2451	0.3748	-0.1453	0.1007	0.08838	-0.2951	0.2843	0.3754	0.43	0.004754
Cl	0.1826	-0.1334	-0.5004	0.2641	0.234	-0.05296	0.02704	0.3908	-0.0255	0.01619	-0.02754	0.03557	-0.2367	0.3159	0.5089
SO4	0.1878	-0.4249	-0.08347	-0.5149	0.06449	0.06759	-0.2166	0.004565	-0.4248	0.3046	0.1724	-0.07899	-0.3208	0.04989	-0.2046
HCO3_mval	0.3078	0.1866	0.05258	-0.02611	0.2071	0.05588	0.004488	-0.1143	0.3017	-0.3733	-0.07663	0.2218	-0.665	-0.02976	-0.2816
bio_1	0.3268	0.04027	0.2706	0.1115	0.1263	0.206	-0.1673	-0.02354	0.02796	0.4236	-0.1062	0.2741	-0.02138	-0.5501	0.3864
bio_2	0.2729	0.376	-0.01155	-0.06616	-0.001838	-0.2017	-0.4835	0.2161	0.1322	0.08307	0.464	0.2629	0.2735	0.233	-0.1435
bio_4	-0.1589	0.5199	-0.4492	-0.4973	0.1245	-0.06957	0.1806	0.146	-0.1219	-0.01881	-0.07789	0.004899	0.02044	-0.3935	0.06717
bio_12	-0.2373	0.1211	0.256	0.0787	0.7897	-0.03152	-0.2671	-0.07382	-0.2969	-0.1379	-0.09948	-0.1474	0.09134	0.09271	0.01162
bio_15	0.3087	0.2802	0.09168	-0.08597	-0.03923	0.007377	-0.08405	-0.005985	0.2606	0.2377	-0.1819	-0.7859	-0.06701	0.136	0.06036

## Sheet: PLS_results_Females_RV
Axis	Sing.val.	% covar	Perm.p
1	2.7391	77.946	0.038961
2	0.90983	8.5998	0.94106
3	0.79379	6.546	0.62937
4	0.50102	2.6078	0.93606
5	0.39702	1.6375	0.93906
6	0.33843	1.1899	0.82917
7	0.25837	0.69349	0.84615
8	0.1977	0.40604	0.88811
9	0.15516	0.25011	0.76823
10	0.08396	0.073233	0.96404
11	0.05763	0.034504	0.93207
12	0.03181	0.010512	0.93307
13	0.019854	0.0040952	0.78422
14	0.0073401	0.00055971	0.95604
15	0.0034312	0.00012231	0.7982

## Sheet: PLS_loadings_Females_RV
	Axis 1	Axis 2	Axis 3	Axis 4	Axis 5	Axis 6	Axis 7	Axis 8	Axis 9	Axis 10	Axis 11	Axis 12	Axis 13	Axis 14	Axis 15
rw1	-0.3892	0.5527	-0.2897	0.2645	0.3476	0.01789	0.1507	0.2891	0.1262	0.2085	0.1816	0.08134	0.08925	0.05238	0.00724
rw2	-0.2373	-0.3346	0.1846	-0.2145	0.2223	0.3411	-0.1618	-0.2103	0.2153	0.3147	0.3479	-0.1488	0.1079	-0.2076	-0.12
rw3	0.1003	-0.2176	-0.2997	0.2888	0.05919	-0.09688	-0.2872	0.1414	0.2122	0.02922	0.06275	-0.1284	-0.3194	-0.3555	-0.09893
rw4	0.5743	-0.009982	0.04761	-0.1865	0.398	0.08968	0.4236	0.1152	0.2122	-0.01586	0.01763	0.009031	-0.1908	-0.08796	0.001894
rw5	0.3026	-0.2149	-0.009521	0.3437	-0.1905	0.09123	0.06183	0.3223	-0.2697	0.4074	-0.02923	-0.3041	0.3265	0.1999	0.1892
rw6	-0.4013	-0.1928	-0.02551	0.07212	-0.2979	0.08753	0.377	0.05287	0.01708	0.203	-0.09833	0.0312	-0.4777	-0.169	0.3077
rw7	-0.1461	0.006308	0.03704	-0.2303	-0.2679	0.3032	0.1669	0.1702	-0.2579	-0.3234	0.3015	-0.1043	-0.122	0.2165	-0.0849
rw8	-0.06978	0.02467	0.02502	-0.041	0.3796	0.1431	0.2139	-0.3267	-0.5092	0.09822	-0.1737	0.1821	0.0911	-0.06978	0.04069
rw9	0.08854	0.301	-0.0741	-0.1044	0.02069	-0.09386	-0.02108	0.05675	-0.1364	-0.3406	-3.545e-05	-0.469	-0.1083	-0.2648	0.1131
rw10	-0.3254	-0.4178	-0.09041	0.07625	0.3136	-0.3626	0.02214	0.003385	-0.03193	-0.2798	-0.3377	-0.1746	0.1846	0.1188	-0.04174
rw11	0.04124	-0.05212	-0.1026	-0.1823	0.2373	0.026	-0.1834	0.09947	-0.01728	0.2679	-0.1608	-0.05402	-0.4852	0.6094	-0.1128
rw12	-0.07065	0.06144	0.1994	0.09293	0.2004	-0.06389	-0.1266	0.01962	-0.1992	0.04231	0.4162	-0.3974	-0.003154	0.05888	-0.06364
rw13	0.1214	-0.07543	-0.2933	0.2825	0.1219	0.3907	-0.1639	-0.07435	-0.4278	-0.06978	-0.0487	0.1218	-0.1623	-0.2562	-0.0652
rw14	0.004854	-0.2597	-0.02995	0.04783	0.2217	-0.2974	0.09046	-0.006504	-0.1794	-0.1679	0.4577	0.07829	-0.1924	0.1051	0.4346
rw15	0.05253	-0.07941	-0.4737	-0.273	0.001019	0.2067	-0.2919	0.04085	0.1331	-0.1296	0.1248	0.219	0.2611	0.1306	0.4708
rw16	-0.04528	0.1403	-0.2027	-0.2168	0.02855	0.1164	0.07916	-0.2949	0.09863	0.1678	-0.2578	-0.5426	0.01941	-0.03506	0.3468
rw17	-0.146	0.03086	0.431	0.002141	0.2145	0.3509	-0.3225	0.4441	0.01112	-0.2153	-0.3192	-0.007817	-0.0788	-0.05309	0.2291
rw18	-0.1081	-0.167	-0.4056	-0.3743	-0.02898	0.02192	0.1354	0.3315	-0.1686	0.008884	-0.03135	-0.1088	0.08813	-0.1029	-0.4343
rw19	0.0114	0.1163	-0.1309	0.2518	-0.105	0.1504	-0.1628	-0.4255	0.04313	-0.1744	0.009184	-0.1254	-0.1874	0.3108	-0.1514
rw20	-0.01811	-0.1949	-0.05849	0.3493	0.09481	0.3858	0.3791	-0.02545	0.3407	-0.335	0.01625	-0.122	0.1472	0.189	-0.07754
conduct	-0.2872	0.1444	-0.0008847	0.01253	-0.2531	0.0904	-0.3039	0.1197	-0.1083	0.08494	-0.7874	0.2225	-0.1336	0.09436	0.04951
temp	-0.2497	-0.1801	-0.2183	0.05638	0.2855	0.7038	0.3193	0.1008	-0.3684	0.1415	0.02258	0.0709	-0.0183	-0.02727	-0.05632
pH	-0.271	0.03793	-0.1319	-0.3977	-0.1699	-0.2642	-0.2556	0.1178	-0.6809	-0.07565	0.2749	-0.1597	0.01122	-0.01749	-0.0299
Na	-0.2141	-0.07108	0.4569	-0.2981	-0.1736	0.1365	0.1254	0.2193	0.2118	-0.0898	0.1307	0.04897	-0.2014	0.3372	-0.5588
K	-0.2249	-0.1984	0.3811	0.08263	0.5175	-0.3697	0.04725	0.4656	-0.03607	0.2634	-0.0583	0.02826	0.02928	-0.001856	0.2424
Mg	-0.2776	0.2849	0.064	0.2128	-0.1064	-0.1853	0.212	-0.4524	-0.1016	0.5049	0.226	0.2276	-0.2142	0.2804	0.06642
Ca	-0.3018	-0.07424	-0.1693	0.3031	-0.2179	0.1524	-0.3524	0.232	0.2467	0.07855	0.2909	-0.01489	0.5096	0.3334	0.107
Cl	-0.2087	-0.1296	0.4408	-0.2368	-0.4075	0.1885	0.2321	-0.1477	0.05013	-0.01033	0.02671	-0.007392	0.2341	-0.353	0.4788
SO4	-0.2336	0.1679	0.2317	0.6845	-0.1231	-0.06822	0.09807	0.05724	-0.2024	-0.391	0.02858	-0.1634	-0.05607	-0.2975	-0.2222
HCO3_mval	-0.2894	-0.1203	-0.2236	-0.05867	-0.0673	-0.07963	-0.0278	-0.04248	0.2914	0.4607	-0.09146	-0.5121	-0.07388	-0.4143	-0.3001
bio_1	-0.3005	0.163	-0.2609	-0.07313	0.0371	0.02486	0.1443	0.1503	0.2762	-0.3357	0.08177	-0.2725	-0.5075	0.1808	0.4518
bio_2	-0.2702	-0.2849	-0.1902	-0.06222	0.08113	-0.3156	0.4135	-0.3039	-0.01087	-0.2901	-0.3141	-0.08884	0.3829	0.2944	-0.1105
bio_4	0.1435	-0.7842	0.006103	0.246	-0.2687	-0.05207	-0.1326	-0.09229	-0.1248	0.03272	0.02768	-0.02852	-0.3947	0.1373	0.09988
bio_12	0.2543	0.06426	-0.2708	0.05808	-0.449	-0.1907	0.5258	0.5366	-0.05455	0.1843	-0.0285	0.1116	0.04386	-0.008498	-0.004755
bio_15	-0.2946	-0.167	-0.2692	-0.06753	0.03743	-0.1673	-0.0573	0.007949	0.2197	-0.177	0.176	0.6931	-0.09734	-0.4044	-0.1076

## Sheet: PLS_results_Males_LV
Axis	Sing.val.	% covar	Perm.p
1	2.6133	68.744	0.12587
2	1.3142	17.386	0.42358
3	0.80272	6.4862	0.95205
4	0.54881	3.0318	0.88611
5	0.45325	2.068	0.83417
6	0.31235	0.98205	0.98102
7	0.24821	0.62016	0.97602
8	0.19115	0.36779	0.97403
9	0.13171	0.17461	0.99101
10	0.10353	0.1079	0.9011
11	0.042243	0.017962	1
12	0.028606	0.0082368	0.99301
13	0.020435	0.0042033	0.90609
14	0.0087323	0.00076757	0.94306
15	0.0013431	1.8158e-05	0.97003

## Sheet: PLS_loadings_Males_LV
	Axis 1	Axis 2	Axis 3	Axis 4	Axis 5	Axis 6	Axis 7	Axis 8	Axis 9	Axis 10	Axis 11	Axis 12	Axis 13	Axis 14	Axis 15
rw1	-0.4063	-0.584	0.02982	0.4873	-0.1404	-0.0765	0.2748	-0.2489	-0.02052	0.04855	0.09933	0.1468	-0.001615	0.03011	0.02664
rw2	0.2359	-0.1212	-0.0477	0.202	-0.2669	0.09952	-0.1933	0.1827	0.3881	0.3206	-0.3573	-0.08613	-0.2915	-0.08624	-0.03483
rw3	0.2792	-0.06306	0.1206	0.05886	-0.1778	0.02576	0.0194	-0.3418	-0.04487	0.07811	-0.2302	-0.06979	-0.008091	0.007351	-0.6355
rw4	0.2302	-0.2936	-0.2209	-0.07661	-0.2479	-0.1695	0.2511	0.2699	-0.1623	-0.2766	0.2972	-0.3058	0.1653	-0.1324	-0.144
rw5	-0.04793	-0.2702	-0.159	-0.38	-0.2024	-0.1001	0.05502	-0.1741	0.2162	0.3868	-0.03914	0.1367	0.1765	-0.2727	0.1724
rw6	0.4043	-0.1197	0.4277	0.3415	0.2521	0.08255	-0.06608	0.04807	-0.2007	0.2549	0.1411	-0.1679	0.3075	-0.1154	0.262
rw7	-0.124	-0.01459	-0.02341	0.02898	0.2082	-0.06848	0.1962	0.6495	-0.08463	0.2009	0.01056	0.2348	-0.09052	-0.3299	-0.3634
rw8	0.2394	-0.423	0.2247	-0.2882	0.1455	-0.2934	0.0936	0.1696	0.1511	-0.2019	-0.1175	-0.01512	-0.2894	0.4807	0.06731
rw9	-0.03959	-0.01502	-0.2032	0.3744	0.224	-0.132	-0.2274	-0.03531	0.1858	-0.2355	-0.06965	-0.2421	0.1435	0.0913	-0.285
rw10	-0.3407	-0.3709	0.1906	-0.1587	0.1858	0.3856	-0.2325	0.1853	-0.08778	-0.2075	-0.4576	-0.1228	0.1812	-0.1209	0.01375
rw11	0.2187	-0.1152	-0.08401	0.1302	0.06786	0.2086	0.02049	0.1836	0.4376	0.08525	0.2109	0.1911	0.2633	0.1172	-0.08362
rw12	0.003461	-0.07284	-0.3328	0.03246	0.05185	0.3131	-0.2395	-0.02997	0.1382	-0.2952	0.2143	0.3095	-0.008053	0.03633	-0.05732
rw13	0.2372	-0.07846	-0.1467	0.08008	0.4312	-0.4081	-0.05426	-0.2131	-0.132	-0.09514	-0.2507	0.4482	-0.06617	-0.274	0.02455
rw14	-0.02229	0.1214	0.4506	-0.1772	0.09733	0.1679	0.3556	-0.1358	0.2585	-0.09774	0.05533	0.2908	0.2332	0.06777	-0.2789
rw15	0.2978	-0.1784	-0.07026	-0.2262	-0.01006	0.1969	-0.001407	-0.2047	-0.001993	-0.2631	-0.008919	-0.1008	0.09312	-0.4364	-0.003098
rw16	-0.008771	0.1454	-0.009595	0.09491	-0.06989	-0.3087	0.05136	0.1224	0.4193	-0.2099	-0.2153	0.003908	0.4159	-0.05113	0.2779
rw17	-0.2622	0.1013	0.137	-0.09567	-0.0951	-0.4081	-0.154	-0.007964	0.04878	0.03661	-0.05864	-0.1912	0.2835	-0.09552	-0.2475
rw18	-0.05123	0.1623	0.2245	0.2053	-0.03701	0.05572	0.3238	-0.0363	0.2759	-0.3335	-0.02249	-0.1612	-0.4162	-0.4217	0.1391
rw19	-0.1654	-0.116	0.004987	-0.1866	0.4856	-0.0758	-0.1381	-0.1801	0.3345	0.2185	0.3902	-0.3556	-0.1961	-0.1331	-0.09416
rw20	-0.0149	-0.08507	0.4244	0.006135	-0.3292	-0.1882	-0.5709	0.0841	0.01879	-0.1773	0.3354	0.2826	-0.1214	-0.1764	-0.04155
conduct	0.2726	-0.2928	0.2239	-0.186	0.2386	-0.3299	0.2113	-0.1054	0.2605	-0.06613	0.02191	-0.3842	0.5018	-0.2105	0.1314
temp	0.2877	0.1809	-0.1368	-0.002135	-0.5012	0.2404	0.4667	0.07602	0.5488	-0.06007	-0.1297	-0.03171	-0.03926	0.07423	-0.05979
pH	0.2234	-0.3746	-0.2428	-0.3061	0.08316	-0.265	-0.2196	-0.3455	0.3064	0.1651	-0.2128	0.32	-0.3471	0.1217	-0.09106
Na	0.2067	0.1058	0.1565	-0.487	-0.2851	-0.02557	-0.07997	0.08168	-0.2706	0.08989	0.1347	0.08952	0.1223	-0.2931	-0.6173
K	0.2151	0.3332	-0.01521	0.1122	-0.2777	-0.2912	0.01177	-0.6062	-0.1818	-0.2517	0.3372	0.1338	-0.0127	-0.06621	0.2603
Mg	0.2576	-0.1678	0.2994	0.2794	0.05839	0.3647	-0.4372	0.06181	0.3387	-0.2558	0.2564	0.2311	-0.0355	-0.325	-0.01325
Ca	0.3331	-0.00922	0.1062	0.05676	0.3002	-0.1451	0.3842	0.2542	-0.1078	0.1099	0.3884	-0.09941	-0.6025	-0.05859	-0.01466
Cl	0.2121	0.1534	0.2791	-0.5563	-0.08062	0.188	-0.251	0.1907	-0.06684	-0.03051	-0.02958	-0.08155	-0.09483	0.2996	0.5397
SO4	0.2214	0.003921	0.5883	0.2223	0.1267	0.2021	0.2081	-0.334	-0.1805	0.1963	-0.3369	0.1584	0.0512	0.3182	-0.1733
HCO3_mval	0.3187	0.00197	-0.2184	0.02947	0.2074	-0.09745	0.002376	0.2183	-0.2004	-0.717	-0.2045	0.09773	0.09351	0.3037	-0.2075
bio_1	0.2858	-0.3035	-0.2119	0.08972	-0.1652	0.147	0.1591	0.1074	-0.4197	0.1078	-0.3389	0.2031	0.04124	-0.4578	0.3637
bio_2	0.2895	0.1647	-0.3199	0.04631	0.1711	0.3633	-0.2537	-0.3099	-0.09431	0.09734	-0.1138	-0.6268	-0.1133	-0.08193	-0.1385
bio_4	-0.03286	0.5909	-0.06995	-0.196	0.5176	0.05828	0.1223	-0.02819	0.1834	0.02975	-0.2102	0.3339	0.06596	-0.3463	0.07008
bio_12	-0.2481	-0.3123	-0.1142	-0.3494	0.1612	0.5202	0.3614	-0.3189	-0.09124	-0.2411	0.3127	0.1043	0.01849	0.03844	-0.00126
bio_15	0.3209	0.035	-0.3312	0.1014	0.1303	0.1015	-0.05006	0.1243	-0.01557	0.4268	0.4037	0.2492	0.4551	0.3392	0.0303

## Sheet: PLS_results_Males_RV
Axis	Sing.val.	% covar	Perm.p
1	2.7688	71.546	0.13487
2	1.1021	11.335	0.91708
3	1.0338	9.9741	0.51449
4	0.62562	3.6527	0.51748
5	0.35608	1.1832	0.99101
6	0.32586	0.99093	0.89411
7	0.26742	0.6674	0.80819
8	0.20237	0.38218	0.72927
9	0.1326	0.16408	0.67433
10	0.072643	0.049247	0.97702
11	0.067029	0.041929	0.53247
12	0.025352	0.005998	0.99001
13	0.02007	0.0037591	0.6963
14	0.016734	0.0026133	0.17483
15	0.00084139	6.6067e-06	0.85415

## Sheet: PLS_loadings_Males_RV
Supplementary Table 3. Summary statistics and loading values of the four PLS analyses.
	Axis 1	Axis 2	Axis 3	Axis 4	Axis 5	Axis 6	Axis 7	Axis 8	Axis 9	Axis 10	Axis 11	Axis 12	Axis 13	Axis 14	Axis 15
rw1	-0.3798	-0.3538	0.2319	-0.1531	-0.2324	0.08401	-0.07028	-0.4464	0.03427	-0.008397	0.3901	-0.07912	-0.06037	-0.259	-0.1668
rw2	0.01565	0.09902	-0.2995	0.339	0.3109	0.2229	-0.2238	-0.06921	0.06185	-0.01134	0.05779	-0.09842	-0.2384	-0.2108	0.1025
rw3	0.5502	-0.1255	0.3002	0.262	-0.2589	-0.09244	-0.02975	0.1216	0.1381	0.0196	0.2998	-0.1844	0.1436	-0.1062	0.08936
rw4	-0.2507	0.1625	-0.3631	0.1378	-0.2787	0.2206	0.08428	0.2787	0.2266	0.2334	0.1704	0.0009505	-0.08274	0.3379	-0.2144
rw5	0.4247	-0.129	0.02511	-0.2379	0.1586	0.5108	0.09842	0.01262	-0.3213	0.115	0.03089	-0.2025	-0.369	0.007287	-0.3527
rw6	0.09539	-0.03628	-0.1616	-0.2492	0.1105	0.04851	0.1361	0.3175	-0.1199	-0.2533	0.02013	0.2045	0.06491	-0.3784	0.2119
rw7	-0.2217	-0.385	0.08399	0.3641	0.05994	0.1203	0.1875	0.1067	-0.285	0.1138	-0.3956	-0.04244	-0.02397	-0.0654	0.285
rw8	-0.05453	0.2056	-0.2962	-0.07488	-0.1108	0.1088	0.1026	0.2212	-0.1724	-0.1527	0.3648	-0.2287	0.3496	-0.2977	0.03239
rw9	0.2003	0.4452	0.1261	0.2405	-0.02646	-0.1699	-0.08129	-0.16	-0.07391	-0.1995	-0.05719	0.2378	-0.1916	0.01255	-0.276
rw10	0.07774	-0.001605	-0.1271	-0.02592	-0.3892	0.2014	-0.4426	-0.08516	-0.4674	0.1854	0.1132	0.2459	0.03124	0.2491	0.3392
rw11	0.1264	-0.3271	-0.3703	-0.1548	0.1942	-0.458	-0.4503	0.07294	0.004147	0.2547	0.03366	0.1462	-0.05266	-0.1574	-0.1791
rw12	0.2443	-0.361	-0.1071	0.3525	-0.08698	-0.1154	0.08254	0.1303	0.06509	-0.005913	0.09267	-0.1393	0.09279	0.1949	-0.03586
rw13	-0.168	-0.02612	-0.01205	0.4762	0.2255	0.1913	-0.1307	-0.01222	-0.02235	0.1203	0.1491	0.09198	0.1755	-0.2561	-0.2965
rw14	-0.2677	0.1014	0.3104	-0.05488	0.1798	-0.2008	-0.2831	0.4467	-0.08536	0.004421	0.2164	-0.4327	-0.362	0.1325	0.1397
rw15	-0.06609	-0.244	0.09468	-0.0777	0.02821	-0.0573	0.3196	0.338	0.008083	0.08441	0.2124	0.4786	-0.1254	0.1184	-0.2173
rw16	0.01276	0.1895	-0.1265	-0.01477	-0.3465	-0.2839	0.2734	-0.03671	-0.1198	0.5275	-0.2179	-0.2462	-0.1783	-0.3717	-0.07648
rw17	0.05378	-0.07831	-0.0965	-0.2469	0.192	0.1059	-0.08545	-0.08792	0.1949	0.1244	-0.2208	-0.3326	0.4318	0.2626	-0.1299
rw18	0.03521	-0.1915	-0.1635	-0.04587	-0.3694	0.2089	-0.1889	0.1074	0.481	-0.3061	-0.2577	-0.02299	-0.3517	-0.1809	0.06441
rw19	0.01818	0.152	0.4155	-0.09028	-0.02972	0.2875	-0.2855	0.307	0.2305	0.3837	-0.1807	0.2112	0.2239	-0.254	-0.03164
rw20	-0.1331	-0.08131	0.04741	0.05534	-0.2752	-0.07495	-0.2289	0.2413	-0.351	-0.3687	-0.3152	-0.1194	0.1735	-0.01956	-0.4991
conduct	0.2854	-0.2262	0.1473	-0.08797	0.1954	-0.1264	0.05134	-0.5204	0.1342	-0.6707	0.1023	-0.05403	-0.1577	0.03335	-0.05627
temp	0.2975	0.3471	-0.02417	0.01657	0.006613	-0.258	-0.1551	-0.02702	0.416	0.1382	-0.3436	-0.545	-0.08747	-0.2839	0.05676
pH	0.1849	-0.02102	0.3917	0.4619	0.6499	0.2233	0.01855	-0.0851	0.03077	0.3254	0.0355	0.01835	0.05742	0.0823	0.0144
Na	0.2492	-0.1879	-0.3323	0.3696	-0.1248	-0.2644	0.1826	0.008491	0.0539	0.09644	0.09387	0.1428	-0.2527	0.1614	0.6367
K	0.2353	-0.02207	-0.364	0.2983	-0.3006	0.4348	-0.2554	-0.477	-0.1673	0.1508	-0.09035	0.0446	-0.07029	-0.1279	-0.2614
Mg	0.2576	-0.2709	0.05361	-0.3227	0.07776	0.3408	0.3306	0.2334	-0.3073	0.0717	-0.28	-0.196	-0.4793	-0.14	0.03908
Ca	0.3154	0.05554	0.08943	-0.3464	0.1171	-0.3607	-0.1466	-0.1643	-0.218	0.2697	-0.0292	0.5388	0.06009	-0.4001	0.04439
Cl	0.2419	-0.1332	-0.3596	0.1643	0.1072	-0.2512	0.5163	0.1932	0.06513	0.02885	0.1045	-0.009082	0.2396	-0.1219	-0.5483
SO4	0.2318	-0.2993	-0.1555	-0.4905	0.02237	0.2432	-0.07116	-0.0943	0.3889	0.3157	0.2691	-0.126	0.3155	0.2554	0.1199
HCO3_mval	0.2975	0.1845	0.1395	-0.02426	-0.1668	-0.07144	0.1913	-0.1226	-0.4322	-0.06313	-0.3429	-0.1536	0.5041	0.4101	0.1365
bio_1	0.279	-0.008015	0.3414	0.0333	-0.3369	-0.1144	-0.1049	0.1778	0.27	0.1134	-0.1138	0.2821	-0.3224	0.4643	-0.3708
bio_2	0.2458	0.397	0.06808	0.02152	-0.1261	0.468	0.2652	0.1849	0.3232	-0.2927	0.02	0.3547	0.1635	-0.2376	0.1947
bio_4	-0.0869	0.5762	-0.3782	-0.2416	0.3477	0.02148	0.1634	-0.1966	-0.0273	0.06968	0.02776	0.1065	-0.3146	0.3865	-0.07938
bio_12	-0.288	0.04184	0.3232	-0.02446	-0.309	-0.04302	0.5681	-0.4815	0.1351	0.3271	0.08549	-0.05303	-0.07583	-0.1306	0.01438
bio_15	0.288	0.2879	0.17	0.0118	-0.1676	-0.02379	-0.0682	0.1211	-0.3105	0.02195	0.7427	-0.2991	-0.1251	-0.05228	-0.02656
