# Supplementary material for: Significance of climate and hydrochemistry on shape variation – a case study on Neotropical cytheroidean Ostracoda
Source: Copernicus journal article supplement (doi:10.5194/bg-15-5489-2018), 2018-09-14
Supplement: Supplementary file 5 [file Supplementary_Table_4.xlsx]

## Sheet: MR_results_Females_LV_RW1
Supplementary Table 4. Summary statistics of the multiple regression analyses, with results of Shapiro-Wilk normality tests, calculation of variance inflation factors and individual variable contributions resulting from hierarchical partitioning.
Results of multiple regression analysis with RW 1, incl. VIF selection and backward stepwise variable selection
Residuals:
Min	1Q	Median	3Q	Max
-0.035964	-0.005046	-9.9e-05	0.005498	0.023507
Coefficients:
	Estimate	Std. Error	t value	Pr(>|t|)
(Intercept)	0.323873	0.194693	1.664	0.1002
temp	-0.04668	0.019829	-2.354	0.021	*
pH	-0.087755	0.043942	-1.997	0.0493	*
Cl	0.016465	0.003425	4.808	7.15e-06	***
SO4	-0.011538	0.002325	-4.962	3.92e-06	***
bio_4	0.063503	0.010042	6.324	1.42e-08	***
bio_12	-0.11124	0.056724	-1.961	0.0534	.
---
Signif. codes: 0 ‘***’ 0.001 ‘**’ 0.01 ‘*’ 0.05 ‘.’ 0.1 ‘ ’ 1
Residual standard error: 0.01032 on 79 degrees of freedom
Multiple R-squared: 0.6576
Adjusted R-squared: 0.6316
F-statistic: 25.29 on 6 and 79 degrees of freedom
p-value: < 2.2e-16
Shapiro-Wilk normality test of residuals:
W = 0.96508
p-value = 0.02
(but see QQplot)
VIF
temp	2.66237
pH	2.42427
Cl	2.48092
SO4	3.54284
bio_4	1.54394
bio_12	3.40157
hier.part
variable	%I
bio_4	46.231
SO4	19.2871
pH	13.0389
Cl	9.42506
temp	7.33846
bio_12	4.67946

## Sheet: MR_results_Females_LV_RW2
Results of multiple regression analysis with RW 2, incl. VIF selection and backward stepwise variable selection
Residuals:
Min	1Q	Median	3Q	Max
-0.033764	-0.005263	0.000411	0.005104	0.018276
Coefficients:
	Estimate	Std. Error	t value	Pr(>|t|)
(Intercept)	0.927773	0.145501	6.376	1.09e-08	***
K	-0.017236	0.004777	-3.608	0.000536	***
Cl	0.018895	0.00332	5.691	2.01e-07	***
SO4	-0.006289	0.002015	-3.121	0.00251	**
bio_4	0.015201	0.008336	1.824	0.071936	.
bio_12	-0.315153	0.047059	-6.697	2.69e-09	***
---
Signif. codes: 0 ‘***’ 0.001 ‘**’ 0.01 ‘*’ 0.05 ‘.’ 0.1 ‘ ’ 1
Residual standard error: 0.009002 on 80 degrees of freedom
Multiple R-squared: 0.5389
Adjusted R-squared: 0.5101
F-statistic: 18.7 on 5 and 80 degrees of freedom
p-value: 2.891e-12
Shapiro-Wilk normality test of residuals:
W = 0.95736
p-value = 0.006328
(but see QQplot)
VIF
K	4.70196
Cl	3.06729
SO4	3.50047
bio_4	1.39902
bio_12	3.07889
hier.part
variable	%I
bio_12	43.8859
Cl	32.9153
K	11.6781
SO4	9.52356
bio_4	1.9971

## Sheet: MR_results_Females_LV_RW3
Results of multiple regression analysis with RW 2, incl. VIF selection and backward stepwise variable selection
Residuals:
Min	1Q	Median	3Q	Max
-0.0219553	-0.0057627	0.0001378	0.0048481	0.0282242
Coefficients:
	Estimate	Std. Error	t value	Pr(>|t|)
(Intercept)	0.003618	0.024875	0.145	0.88473
temp	-0.024667	0.011577	-2.131	0.03615	*
Cl	-0.007226	0.002828	-2.555	0.01248	*
SO4	0.005666	0.001666	3.401	0.00104	**
bio_4	0.015354	0.007711	1.991	0.04984	*
---
Signif. codes: 0 ‘***’ 0.001 ‘**’ 0.01 ‘*’ 0.05 ‘.’ 0.1 ‘ ’ 1
Residual standard error: 0.008948 on 81 degrees of freedom
Multiple R-squared: 0.1826
Adjusted R-squared: 0.1423
F-statistic: 4.524 on 4 and 81 degrees of freedom
p-value: 0.002384
Shapiro-Wilk normality test of residuals:
W = 0.98331
p-value = 0.3338
VIF
temp	1.20806
Cl	2.25166
SO4	2.41996
bio_4	1.21186
hier.part
variable	%I
SO4	33.343
temp	27.5225
Cl	24.5717
bio_4	14.5628

## Sheet: MR_results_Females_RV_RW1
Results of multiple regression analysis with RW 1, incl. VIF selection and backward stepwise variable selection
Residuals:
Min	1Q	Median	3Q	Max
-0.028977	-0.005391	0.001499	0.007386	0.024734
Coefficients:
	Estimate	Std. Error	t value	Pr(>|t|)
(Intercept)	-0.534862	0.242783	-2.203	0.03058	*
temp	0.056749	0.01927	2.945	0.00427	**
K	0.019937	0.00667	2.989	0.00376	**
Cl	-0.03009	0.004434	-6.787	2.1e-09	***
SO4	0.012716	0.002833	4.488	2.48e-05	***
bio_4	-0.079424	0.011025	-7.204	3.41e-10	***
bio_12	0.215246	0.07513	2.865	0.00537	**
---
Signif. codes: 0 ‘***’ 0.001 ‘**’ 0.01 ‘*’ 0.05 ‘.’ 0.1 ‘ ’ 1
Residual standard error: 0.01228 on 77 degrees of freedom
Multiple R-squared: 0.6223
Adjusted R-squared: 0.5929
F-statistic: 21.15 on 6 and 77 degrees of freedom
p-value: 1.675e-14
Shapiro-Wilk normality test of residuals:
W = 0.95799
p-value = 0.007869
(but see QQplot)
VIF
temp	1.56138
K	4.26636
Cl	2.90735
SO4	3.04966
bio_4	1.32564
bio_12	3.5569
hier.part
variable	%I
bio_4	44.4746
Cl	20.4399
SO4	18.0734
temp	8.66933
K	4.68177
bio_12	3.66102

## Sheet: MR_results_Females_RV_RW2
Results of multiple regression analysis with RW 2, incl. VIF selection and backward stepwise variable selection
Residuals:
Min	1Q	Median	3Q	Max
-0.0291595	-0.0048661	0.0009899	0.0061757	0.0206544
Coefficients:
	Estimate	Std. Error	t value	Pr(>|t|)
(Intercept)	0.63188	0.161072	3.923	0.000185	***
Cl	0.007419	0.003213	2.309	0.023574	*
SO4	-0.008533	0.002278	-3.746	0.00034	***
bio_4	0.013459	0.008667	1.553	0.124468
bio_12	-0.213977	0.05061	-4.228	6.29e-05	***
---
Signif. codes: 0 ‘***’ 0.001 ‘**’ 0.01 ‘*’ 0.05 ‘.’ 0.1 ‘ ’ 1
Residual standard error: 0.01007 on 79 degrees of freedom
Multiple R-squared: 0.2927
Adjusted R-squared: 0.2569
F-statistic: 8.174 on 4 and 79 degrees of freedom
p-value: 1.438e-05
Shapiro-Wilk normality test of residuals:
W = 0.95329
p-value = 0.004048
(but see QQplot)
VIF
Cl	2.26903
SO4	2.92937
bio_4	1.21734
bio_12	2.39823
hier.part
variable	%I
bio_12	48.3988
SO4	23.4615
Cl	20.1207
bio_4	8.01895

## Sheet: MR_results_Males_LV_RW1
Results of multiple regression analysis with RW 1, incl. VIF selection and backward stepwise variable selection
Residuals:
Min	1Q	Median	3Q	Max
-0.0198519	-0.0042698	-0.0003839	0.0061699	0.0175182
Coefficients:
	Estimate	Std. Error	t value	Pr(>|t|)
(Intercept)	-0.198353	0.189616	-1.046	0.300764
pH	-0.087113	0.040299	-2.162	0.035661	*
Cl	-0.023717	0.004552	-5.21	3.93e-06	***
SO4	0.010711	0.003014	3.554	0.000864	***
bio_4	-0.050963	0.010718	-4.755	1.85e-05	***
bio_12	0.136697	0.055119	2.48	0.016697	*
---
Signif. codes: 0 ‘***’ 0.001 ‘**’ 0.01 ‘*’ 0.05 ‘.’ 0.1 ‘ ’ 1
Residual standard error: 0.009082 on 48 degrees of freedom
Multiple R-squared: 0.6718
Adjusted R-squared: 0.6376
F-statistic: 19.65 on 5 and 48 degrees of freedom
p-value: 1.319e-10
Shapiro-Wilk normality test of residuals:
W = 0.97734
p-value = 0.3948
VIF
pH	1.49448
Cl	2.79553
SO4	3.4818
bio_4	1.64016
bio_12	2.09811
hier.part
variable	%I
bio_4	35.3478
Cl	34.4935
bio_12	14.9972
SO4	10.7764
pH	4.3851

## Sheet: MR_results_Males_LV_RW3
Results of multiple regression analysis with RW 3, incl. VIF selection and backward stepwise variable selection
Residuals:
Min	1Q	Median	3Q	Max
-0.02553	-0.006602	-0.001586	0.004618	0.037129
Coefficients:
	Estimate	Std. Error	t value	Pr(>|t|)
(Intercept)	-0.005215	0.003239	-1.61	0.1135
SO4	0.003639	0.001994	1.825	0.0738	.
---
Signif. codes: 0 ‘***’ 0.001 ‘**’ 0.01 ‘*’ 0.05 ‘.’ 0.1 ‘ ’ 1
Residual standard error: 0.01121 on 52 degrees of freedom
Multiple R-squared: 0.06019
Adjusted R-squared: 0.04212
F-statistic: 3.33 on 1 and 52 degrees of freedom
p-value: 0.07376
Shapiro-Wilk normality test of residuals:
W = 0.92132
p-value = 0.001677

## Sheet: MR_results_Males_RV_RW1
Results of multiple regression analysis with RW 1, incl. VIF selection and backward stepwise variable selection
Residuals:
Min	1Q	Median	3Q	Max
-0.027253	-0.005569	0.001825	0.007459	0.020427
Coefficients:
	Estimate	Std. Error	t value	Pr(>|t|)
(Intercept)	-0.452704	0.288343	-1.57	0.1245
pH	-0.126094	0.058606	-2.152	0.0377	*
K	0.015279	0.007661	1.994	0.0531	.
Cl	-0.010481	0.006359	-1.648	0.1073
bio_4	-0.053295	0.015604	-3.415	0.0015	**
bio_12	0.225661	0.087424	2.581	0.0137	*
---
Signif. codes: 0 ‘***’ 0.001 ‘**’ 0.01 ‘*’ 0.05 ‘.’ 0.1 ‘ ’ 1
Residual standard error: 0.01229 on 39 degrees of freedom
Multiple R-squared: 0.3952
Adjusted R-squared: 0.3177
F-statistic: 5.097 on 5 and 39 degrees of freedom
p-value: 0.001087
Shapiro-Wilk normality test of residuals:
W = 0.96687
p-value = 0.2221
VIF
pH	1.52462
K	3.92477
Cl	2.90979
bio_4	1.55128
bio_12	2.96852
hier.part
variable	%I
bio_12	31.7762
bio_4	28.7309
Cl	15.8122
pH	12.5173
K	11.1634

## Sheet: MR_results_Males_RV_RW3
Results of multiple regression analysis with RW 3, incl. VIF selection and backward stepwise variable selection
Residuals:
Min	1Q	Median	3Q	Max
-0.0131363	-0.0059539	-2.42e-05	0.0049426	0.019944
Coefficients:
	Estimate	Std. Error	t value	Pr(>|t|)
(Intercept)	0.02517	0.02329	1.08	0.28609
bio_2	0.04259	0.01399	3.044	0.00402	**
bio_4	-0.02835	0.00815	-3.478	0.00119	**
---
Signif. codes: 0 ‘***’ 0.001 ‘**’ 0.01 ‘*’ 0.05 ‘.’ 0.1 ‘ ’ 1
Residual standard error: 0.007959 on 42 degrees of freedom
Multiple R-squared: 0.3183, Adjusted R-squared: 0.2859
F-statistic: 9.807 on 2 and 42 degrees of freedom, p-value: 0.0003199
Shapiro-Wilk normality test of residuals:
W = 0.97034
p-value = 0.2978
VIF
bio_2	1.00819
bio_4	1.00819
hier.part
variable	%I
bio_4	57.2142
bio_2	42.7858
